# Supplementary material for: Neuroendocrine Carcinomas of the Gastroenteropancreatic System: A Comprehensive Review
Source: PubMed Central journal article supplement (PMC4665594; doi:10.3390/diagnostics5020119), 2015-04-08
Supplement: diagnostics-05-00119-s001.pdf [file diagnostics-05-00119-s001.pdf]

# Supplementary Information

**Table S1.** Overview of Studies with Mixed Primary Site Gastroenteropancreatic Neuroendocrine Carciomas.

| Author (Year, Country)                        | Time Period | P  | CR | S  | O  | GB | SI | A  | L  | Other | UK              | GEP-NECs (M:W) | Age (range)                 | LD: ED <sup>g</sup> (n) | Lymph Met. (n) | Distant Met. (n) | Ki-67% (Range) | SC: LC (n)         | N Positive: Syn/CgA/NSE/CD56/p53 | OS Months (Range)     |
|-----------------------------------------------|-------------|----|----|----|----|----|----|----|----|-------|-----------------|----------------|-----------------------------|-------------------------|----------------|------------------|----------------|--------------------|----------------------------------|-----------------------|
| Van der Gaast A. [91] (1990, The Netherlands) | NA          | 2  | 0  | 1  | 2  | 0  | 0  | 0  | 0  | 0     | 1               | 6 (NA)         | NA                          | 2:4                     | NA             | 4                | NA             | 6 <sup>h</sup> :0  | NA                               | (10–22)               |
| Moertel C.G. [114] (1991, USA)                | 1987–1990   | 6  | 3  | 3  | 0  | 0  | 2  | 0  | 0  | 0     | 3               | 17 (NA)        | NA                          | NA                      | NA             | 17 <sup>h</sup>  | NA             | NA                 | NA                               | NA                    |
| Galanis E. [9] (1997, USA)                    | 1974–1994   | 7  | 13 | 0  | 8  | 1  | 0  | 0  | 0  | 0     | 0               | 29 (15:14)     | NA                          | 12:17                   | NA             | 17               | NA             | 29 <sup>h</sup> :0 | NA                               | M <sup>1</sup> : 5 mo |
| Kimura H. [14] (1999, Toyama, Japan)          | 1981–1994   | 0  | 2  | 8  | 4  | 0  | 0  | 0  | 0  | 0     | 0               | 14 (12:2)      | M <sup>2</sup> : 61 (44–75) | NA                      | NA             | 13               | NA             | 14 <sup>h</sup> :0 | p53: 8/14                        | M <sup>1</sup> : 8.4  |
| Mitry E. [88] (1999, France)                  | 1988–1997   | 13 | 2  | 3  | 0  | 2  | 0  | 0  | 0  | 0     | NA <sup>d</sup> | 20 (NA)        | NA                          | 3:17                    | NA             | 17               | NA             | NA                 | NA                               | NA                    |
| Moyana T.N. [44] (2000, Canada)               | 1964–NA     | NA | NA | NA | NA | NA | NA | NA | NA | NA    | NA              | 5 (NA)         | NA                          | NA                      | NA             | 3                | NA             | NA                 | NA                               | NA                    |
| Ordóñez N.G. [36] (2000, USA)                 | NA          | 1  | 11 | 0  | 1  | 0  | 0  | 0  | 0  | 0     | 0               | 13 (NA)        | NA                          | NA                      | NA             | NA               | NA             | 13 <sup>h</sup> :0 | NA                               | NA                    |

Table S1. Cont.

| Author (Year, Country)               | Time Period | P  | CR | S  | O  | GB | SI | A  | L  | Other | UK | GEP-NECs (M:W) | Age (range)                         | LD: ED <sup>g</sup> (n) | Lymph Met. (n) | Distant Met. (n) | Ki-67% (Range) | SC: LC (n)         | N Positive: Syn/CgA/ NSE/CD56/ p53 | OS Months (Range)           |
|--------------------------------------|-------------|----|----|----|----|----|----|----|----|-------|----|----------------|-------------------------------------|-------------------------|----------------|------------------|----------------|--------------------|------------------------------------|-----------------------------|
| Cheuk W. [35] (2001, Hong Kong, USA) | NA          | 1  | 2  | 4  | 7  | 0  | 1  | 0  | 0  | 0     | 0  | 15 (NA)        | NA                                  | NA                      | NA             | NA               | NA             | 15 <sup>h</sup> :0 | NA                                 | NA                          |
| Fjällskog M.L. [83] (2001, Sweden)   | NA          | 4  | 0  | 0  | 0  | 0  | 0  | 0  | 0  | 0     | 0  | 4 (NA)         | NA                                  | NA                      | NA             | 4                | NA             | NA                 | NA                                 | NA                          |
| Dacic S. [41] (2002, USA)            | NA          | 1  | 2  | 2  | 0  | 0  | 0  | 0  | 0  | 0     | 0  | 5 (3:2)        | M <sup>2</sup> :<br>M: 62,<br>W: 60 | NA                      | NA             | NA               | NA             | 5 <sup>h</sup> :0  | p53: 5/5                           | NA                          |
| Papotti M. [72] (2002, Italy)        | NA          | 2  | 2  | 0  | 0  | 0  | 0  | 1  | 0  | 0     | 0  | 5 (3:2)        | (20–76)                             | NA                      | 4              | 1                | NA             | NA                 | NA                                 | (6–72)<br>1: NA             |
| Cimitan M. [80] (2003, Italy)        | NA          | NA | 4  | 1  | NA | NA | NA | NA | NA | 4     | 0  | 9 (6:3)        | (45–73)                             | NA                      | NA             | 7                | NA             | 9 <sup>h</sup> :0  | NA                                 | NA                          |
| Fjällskog M.L. [69] (2003, Sweden)   | NA          | NA | NA | NA | NA | NA | NA | NA | NA | NA    | NA | 5 (2:3)        | (25–64)                             | NA                      | NA             | 5                | NA             | NA                 | NA                                 | NA                          |
| Pizzi S. [38] (2003, Italy)          | NA          | 0  | 9  | 15 | 0  | 0  | 0  | 0  | 0  | 0     | 0  | 24 (19:5)      | (40–91)                             | NA                      | 16 (4 NA)      | 2                | (5–80)         | NA                 | p53: 14/24                         | NA                          |
| Brenner B. [7] (2004, USA)           | 1980–2002   | 6  | 25 | 5  | 19 | 5  | 2  | 0  | 0  | 0     | 2  | 64 (31:33)     | M <sup>1</sup> : 61 (37–86)         | 33:30                   | 34             | 35               | NA             | 64 <sup>h</sup> :0 | NA                                 | M <sup>1</sup> : 11 (1–107) |
| Furlan D. [39] (2004, Italy)         | NA          | 1  | 7  | 6  | 0  | 0  | 0  |    | 0  | 0     | 0  | 14 (11:3)      | (37–77)                             | NA                      | 16 (2 NA)      | 4 (2 NA)         | (25–70)        | NA                 | NA                                 | (1–72)                      |

Table S1. Cont.

| Author (Year, Country)            | Time Period | P  | CR | S  | O  | GB | SI | A  | L  | Other | UK | GEP-NECs (M:W) | Age (range)                         | LD: ED <sup>g</sup> (n) | Lymph Met. (n) | Distant Met. (n) | Ki-67% (Range)             | SC: LC (n)         | N Positive: Syn/CgA/ NSE/CD56/ p53 | OS Months (Range)                  |
|-----------------------------------|-------------|----|----|----|----|----|----|----|----|-------|----|----------------|-------------------------------------|-------------------------|----------------|------------------|----------------------------|--------------------|------------------------------------|------------------------------------|
| La Rosa S. [58] (2004, Italy)     | NA          | 2  | 10 | 7  | 8  | 0  | 0  | 0  | 0  | 0     | 0  | 27 (22:5)      | M <sup>2</sup> : 56–70 <sup>i</sup> | NA                      | NA             | 26               | NA                         | NA                 | NA                                 | NA                                 |
| Pape U.F. [18] (2004, Germany)    | 1980–2001   | NA | NA | NA | NA | NA | NA | NA | NA | NA    | NA | 15 (NA)        | NA                                  | NA                      | NA             | NA               | NA                         | NA                 | NA                                 | M <sup>2</sup> : 15 (95% CI: 7–22) |
| Artale S. [107] (2005, Italy)     | 2000–2003   | 5  | 0  | 0  | 0  | 0  | 0  | 0  | 0  | 0     | 3  | 8 (4:4)        | M <sup>1</sup> : 54 (40–77)         | NA                      | NA             | 8 <sup>h</sup>   | M <sup>2</sup> : 30 (7–90) | NA                 | NA                                 | 2-year survival: 66%               |
| Furlan D. [43] (2005, Italy)      | NA          | 1  | 10 | 7  | 2  | 1  | 0  | 0  | 0  | 0     | 0  | 21 (15:6)      | NA                                  | NA                      | 16             | 7                | (26–70)                    | 1:6 (14 mixed )    | p53: 11/14                         | NA                                 |
| Grabowski P. [45] (2005, Germany) | 1981–2001   | 0  | 8  | 2  | 0  | 0  | 0  | 0  | 0  | 0     | 0  | 10 (9:1)       | M <sup>1</sup> : 56 (29–81)         | NA                      | NA             | 10               | (15–NA)                    | NA                 | NA                                 | M <sup>1</sup> : 13                |
| Pizzi S. [55] (2005, Italy)       | NA          | 0  | 3  | 8  | 0  | 0  | 0  | 0  | 0  | 0     | 0  | 11 (9:2)       | (44–87)                             | NA                      | 8              | 3                | NA                         | NA                 | NA                                 | NA                                 |
| Shida T. [50] (2005, Japan)       | 1999–2004   | 0  | 6  | 3  | 1  | 0  | 0  | 0  | 0  | 0     | 0  | 10 (5:5)       | (45–83)                             | NA                      | NA             | 5                | NA                         | 6:4                | Syn: 7/10, CgA: 4/10               | (1–24)                             |
| Haider K. [12] (2006, Canada)     | 1971–2002   | 7  | 8  | 3  | 2  | 0  | 0  | 0  | 0  | 0     | 0  | 20 (13:7)      | NA                                  | 7:13                    | NA             | NA               | NA                         | 20 <sup>h</sup> :0 | NA                                 | M <sup>1</sup> : 4.4 (0.1–23.5)    |

Table S1. Cont.

| Author (Year, Country)                      | Time Period | P  | CR | S  | O  | GB | SI | A  | L  | Other | UK              | GEP-NECs (M:W) | Age (range)                          | LD: ED <sup>g</sup> (n) | Lymph Met. (n) | Distant Met. (n) | Ki-67% (Range) | SC: LC (n)         | N Positive: Syn/CgA/ NSE/CD56/ p53 | OS Months (Range)                   |
|---------------------------------------------|-------------|----|----|----|----|----|----|----|----|-------|-----------------|----------------|--------------------------------------|-------------------------|----------------|------------------|----------------|--------------------|------------------------------------|-------------------------------------|
| Hainsworth J.D. [84] (2006, USA)            | 1999–2005   | 3  | 9  | 1  | 1  | 1  | 0  | 0  | 0  | 0     | NA <sup>d</sup> | 15 (NA)        | NA                                   | NA                      | NA             | 15               | NA             | NA                 | NA                                 | NA                                  |
| Ishikubo T. [54] (2006, Japan)              | NA          | 0  | 4  | 16 | 1  | 0  | 2  | 0  | 0  | 0     | 0               | 23 (19:4)      | Average: 60                          | NA                      | NA             | NA               | NA             | NA                 | NA                                 | NA                                  |
| Kim K.O. [13] (2006, Korea)                 | 1998–2005   | 5  | 1  | 5  | 6  | 0  | 0  | 0  | 1  | 0     | 0               | 18 (NA)        | NA                                   | 11:7                    | NA             | NA               | NA             | 18 <sup>h</sup> :0 | NA                                 | M <sup>1</sup> : 8 (95% CI: 6.2–10) |
| Li A.F.Y. [42] (2006, Taiwan)               | 1985–2004   | 0  | 6  | 9  | 6  | 0  | 1  | 0  | 0  | 0     | 0               | 22 (18:4)      | M <sup>2</sup> : 66.1 ± 16.9 (32–88) | NA                      | 18             | 7                | NA             | NA                 | p53: 16/22                         | M <sup>2</sup> : 20.3 ± 23.1 (1–91) |
| Uccella S. [37] (2006, Italy)               | 1982–2004   | 0  | 11 | 11 | 6  | 0  | 0  | 0  | 0  | 0     | 0               | 28 (22:6)      | (41–85)                              | NA                      | NA             | (28 “malignant”) | NA             | NA                 | NA                                 | NA                                  |
| Bajetta E. [120] (2007, Italy)              | 2000–2005   | 4  | NA | 0  | NA | NA | 1  | NA | NA | NA    | 0               | 5 (NA)         | NA                                   | NA                      | NA             | NA               | NA             | NA                 | NA                                 | NA                                  |
| Cho C.S. [283] (2007, USA)                  | 1990–2006   | NA | NA | NA | NA | NA | NA | NA | NA | NA    | NA              | 3–7 (NA)       | NA                                   | NA                      | NA             | 3–7 <sup>h</sup> | NA             | NA                 | NA                                 | M <sup>1</sup> : 6                  |
| Cicin I. [75] (2007, Turkey)                | 1999–2006   | 2  | 1  | 0  | 0  | 2  | 0  | 0  | 0  | 0     | 0               | 5 (3:2)        | (40–73)                              | 2:3                     | NA             | 3                | NA             | 5 <sup>h</sup> :0  | NA                                 | (2–68)                              |
| Correale P. [59] (2007, Italy) <sup>a</sup> | 1999–2003   | 2  | NA | NA | NA | NA | NA | NA | NA | 8     | NA <sup>d</sup> | 10 (NA)        | NA                                   | NA                      | NA             | 10               | NA             | NA                 | NA                                 | NA                                  |



Table S1. Cont.

| Author (Year, Country)             | Time Period | P  | CR | S  | O  | GB | SI | A  | L  | Other | UK | GEP-NECs (M:W) | Age (range)                 | LD: ED <sup>g</sup> (n) | Lymph Met. (n) | Distant Met. (n)   | Ki-67% (Range) | SC: LC (n)          | N Positive: Syn/CgA/ NSE/CD56/ p53  | OS Months (Range)                         |
|------------------------------------|-------------|----|----|----|----|----|----|----|----|-------|----|----------------|-----------------------------|-------------------------|----------------|--------------------|----------------|---------------------|-------------------------------------|-------------------------------------------|
| Ceppi P. [47] (2008, Italy)        | 1992–2006   | NA | NA | NA | NA | NA | NA | NA | NA | NA    | NA | 8 (4:4)        | M <sup>2</sup> : 45 (30–85) | NA                      | NA             | NA                 | NA             | NA                  | NA                                  | NA                                        |
| Grabowski P. [46] (2008, Germany)  | 1981–2001   | 0  | 8  | 2  | 0  | 0  | 0  | 0  | 0  | 0     | 0  | 10 (9:1)       | M <sup>1</sup> : 56 (29–81) | NA                      | NA             | 10                 | NA             | NA                  | NA                                  | M <sup>1</sup> : 8 (1–15)                 |
| Le Treut Y.P. [130] (2008, France) | 1989–2005   | NA | NA | NA | NA | NA | NA | NA | NA | NA    | NA | 0–11 (NA)      | NA                          | NA                      | NA             | 0–11 <sup>h</sup>  | NA             | NA                  | NA                                  | M <sup>1</sup> : 10                       |
| Shia, J. [29] (2008, USA)          | NA          | 0  | 40 | 18 | 6  | 0  | 0  | 1  | 0  | 0     | 0  | 65 (36:29)     | M <sup>1</sup> : 64 (30–91) | NA                      | NA             | 22 (7 NA)          | NA             | 23:33 (+ 11 mixed ) | Syn: 57/65, CgA: 42/65, CD56: 47/65 | M <sup>2</sup> : 15.7 (95% CI: 11.3–19.7) |
| Yao J.C. [19] (2008, USA)          | 1973–2004   | NA | NA | NA | NA | NA | NA | NA | NA | NA    | NA | 4054 (NA)      | NA                          | NA                      | NA             | 50%                | NA             | NA                  | NA                                  | M <sup>1</sup> : 10 (95% CI: 9–11)        |
| Frilling A. [128] (2009, Germany)  | 1992–2006   | NA | NA | NA | NA | NA | NA | NA | NA | NA    | NA | 58–82 (NA)     | NA                          | NA                      | NA             | 58–82 <sup>h</sup> | NA             | NA                  | NA                                  | NA                                        |

Table S1. Cont.

| Author (Year, Country)                   | Time Period | P   | CR  | S   | O   | GB              | SI | A  | L  | Other | UK              | GEP-NECs (M:W) | Age (range) | LD: ED <sup>g</sup> (n) | Lymph Met. (n) | Distant Met. (n) | Ki-67% (Range) | SC: LC (n)           | N Positive: Syn/CgA/ NSE/CD56/p53 | OS Months (Range)                                 |
|------------------------------------------|-------------|-----|-----|-----|-----|-----------------|----|----|----|-------|-----------------|----------------|-------------|-------------------------|----------------|------------------|----------------|----------------------|-----------------------------------|---------------------------------------------------|
| Lepage C. [79] (2009, EUROCARE database) | 1985–1994   | 109 | 114 | 123 | 419 | 48 <sup>j</sup> | 7  | 0  | 0  | 0     | 0               | 820 (NA)       | NA          | NA                      | NA             | NA               | NA             | 820 <sup>h</sup> : 0 | NA                                | 5-year survival relative survival: 8.1 (7.4–11.3) |
| Lombard-Bohas C. [71] (2009, France)     | NA          | NA  | NA  | NA  | NA  | NA              | NA | NA | NA | NA    | NA              | 68 (NA)        | NA          | NA                      | NA             | NA               | NA             | NA                   | NA                                | NA                                                |
| Shida T. [51] (2009, Japan)              | 1999–2007   | 2   | 6   | 3   | 1   | 1               | 1  | 0  | 0  | 0     | 0               | 14 (6:8)       | (19–83)     | NA                      | NA             | 10               | (18–82)        | 8:6                  | Syn: 10/14, CgA: 7/14             | (1–48)                                            |
| Shida T. [56] (2009, Japan)              | 1999–2007   | 3   | 6   | 0   | 0   | 0               | 0  | 0  | 0  | 0     | 0               | 9 (4:5)        | (19–84)     | NA                      | NA             | 5                | NA             | 3:6                  | NA                                | (2–65)                                            |
| Srirajaskanthan R. [105] (2009, UK)      | NA          | 3   | 1   | 1   | 0   | 0               | 1  | 0  | 0  | 0     | NA <sup>d</sup> | 6 (NA)         | NA          | NA                      | NA             | NA               | NA             | NA                   | NA                                | NA                                                |
| Wong Y.N. [65] (2009, England)           | 1970–2004   | 55  | 60  | 92  | 293 | 15              | NA | NA | NA | 17    | NA              | 532 (231:301)  | NA          | 181: 159 (192 NA)       | NA             | 159 (192 NA)     | NA             | 532 <sup>h</sup> : 0 | NA                                | 3-year survival: 7%                               |

Table S1. Cont.

| Author (Year, Country)                 | Time Period | P  | CR | S  | O  | GB | SI | A  | L  | Other | UK              | GEP-NECs (M:W)        | Age (range)                           | LD:ED <sup>g</sup> (n) | Lymph Met. (n) | Distant Met. (n) | Ki-67% (Range) | SC:LC (n)         | N Positive: Syn/CgA/NSE/CD56/p53                | OS Months (Range)                                |
|----------------------------------------|-------------|----|----|----|----|----|----|----|----|-------|-----------------|-----------------------|---------------------------------------|------------------------|----------------|------------------|----------------|-------------------|-------------------------------------------------|--------------------------------------------------|
| Binderup T. [111] (2010, Denmark)      | 2007–2008   | NA | NA | NA | NA | NA | NA | NA | NA | NA    | NA              | 14 <sup>c*</sup> (NA) | NA                                    | NA                     | NA             | NA               | NA             | NA                | NA                                              | NA                                               |
| Brennan S.M. [6] (2010, Australia)     | 1985–2007   | NA | NA | NA | 20 | NA | NA | NA | NA | 8     | NA              | 28 (NA)               | NA                                    | 16:12                  | NA             | NA               | NA             | 28 <sup>h:0</sup> | NA                                              | M <sup>1</sup> : 8.4                             |
| Catena L. [57] (2010, Italy)           | 1984–2009   | 12 | 6  | 0  | 0  | 0  | 4  | 0  | 0  | 0     | NA <sup>d</sup> | 30 (NA)               | M <sup>1</sup> : 59 (17–75)           | NA                     | NA             | 30               | NA             | NA                | NA                                              | NA                                               |
| Garcia-Carbonero R. [10] (2010, Spain) | 2001–2008   | NA | NA | NA | NA | NA | NA | NA | NA | NA    | NA              | 54 (34:20)            | NA                                    | NA                     | NA             | 32               | NA             | NA                | NA                                              | M <sup>1</sup> : 14.4                            |
| Gregory D.L. [77] (2010, Australia)    | 1996–2007   | 0  | 1  | 1  | 5  | 0  | 0  | 0  | 0  | 0     | 0               | 7 (NA)                | NA                                    | 6:1                    | NA             | 1                | NA             | 7 <sup>h:0</sup>  | NA                                              | NA                                               |
| Li A.F.Y. [16] (2010, Taiwan)          | 1989–2008   | 0  | 13 | 8  | 17 | 0  | 1  | 0  | 0  | 0     | NA <sup>d</sup> | 39 (35:5)             | M <sup>2</sup> : 61.8–84 <sup>i</sup> | 14:23 (2 NA)           | NA             | 23               | NA             | 39 <sup>h:0</sup> | NA                                              | M <sup>1</sup> : 6–15 (±4.46–49.97) <sup>i</sup> |
| Li A.F.Y. [34] (2010, Taiwan)          | 1989–2009   | 0  | 15 | 15 | 11 | 1  | 0  | 0  | 0  | 0     | 0               | 42 (37:5)             | M <sup>1</sup> : 64 (32–84)           | 15:27                  | NA             | 27               | NA             | 42 <sup>h:0</sup> | Syn: 42/42, CgA: 26/42, NSE: 42/42, CD56: 38/42 | M <sup>1</sup> : 16 ± 21 mo                      |



Table S1. Cont.

| Author (Year, Country)                          | Time Period | P  | CR  | S   | O   | GB | SI | A  | L  | Other | UK | GEP-NECs (M:W) | Age (range)                 | LD: ED <sup>g</sup> (n) | Lymph Met. (n) | Distant Met. (n) | Ki-67% (Range) | SC: LC (n)           | N Positive: Syn/CgA/ NSE/CD56/ p53 | OS Months (Range)           |
|-------------------------------------------------|-------------|----|-----|-----|-----|----|----|----|----|-------|----|----------------|-----------------------------|-------------------------|----------------|------------------|----------------|----------------------|------------------------------------|-----------------------------|
| Niederle M.B. [66] (2010, Austria) <sup>a</sup> | 2004–2005   | 5  | 8   | 2   | 0   | 0  | 2  | 1  | 1  | 0     | 0  | 19 (NA)        | M <sup>1</sup> : 73         | NA                      | NA             | NA               | NA             | NA                   | NA                                 | NA                          |
| O'Toole D. [40] (2010, Ireland)                 | NA          | NA | NA  | NA  | NA  | NA | NA | NA | NA | NA    | NA | 13 (NA)        | NA                          | NA                      | NA             | NA               | NA             | NA                   | NA                                 | M <sup>1</sup> : 13 (0–112) |
| Saxena A. [129] (2010, Australia) <sup>a</sup>  | 2003–2009   | NA | NA  | NA  | NA  | NA | NA | NA | NA | NA    | NA | (5–8) (NA)     | NA                          | NA                      | NA             | 5–8 <sup>h</sup> | NA             | NA                   | NA                                 | NA                          |
| Turner N.C. [119] (2010, UK) <sup>a</sup>       | 1999–2008   | 5  | 0   | 0   | 0   | 0  | 0  | 0  | 0  | NA    | 0  | 5 (NA)         | NA                          | NA                      | NA             | NA               | NA             | NA                   | NA                                 | NA                          |
| Deutschbein T. [116] (2011, Germany)            | 2005–2009   | 2  | 2   | 4   | 1   | 0  | 0  | 0  | 0  | 0     | 3  | 12 (7:5)       | (39–75)                     | NA                      | 7              | 11               | (25–85)        | NA                   | NA                                 | NA                          |
| Ezziddin S. [109] (2011, Germany)               | NA          | 3  | NA  | NA  | NA  | NA | NA | NA | NA | 4     | 0  | 7 (4:3)        | NA                          | NA                      | NA             | 7                | NA             | NA                   | NA                                 | NA                          |
| Grossman R.A. [11] (2011, USA)                  | 1973–2006   | NA | 342 | 147 | 274 | NA | 13 | NA | NA | 456   | 0  | 1232 (NA)      | NA                          | NA                      | NA             | 722              | NA             | 1232 <sup>h</sup> :0 | NA                                 | M <sup>1</sup> : 4          |
| Hentic O. [100] (2011, France)                  | 1997–2006   | 8  | 0   | 1   | 0   | 0  | 1  | 0  | 0  | 0     | 8  | 18 (7:11)      | M <sup>1</sup> : 58 (33–71) | NA                      | NA             | 18 <sup>h</sup>  | (25–90)        | NA                   | NA                                 | M <sup>1</sup> : 14         |

Table S1. Cont.

| Author (Year, Country)                | Time Period | P  | CR | S  | O  | GB | SI | A  | L  | Other | UK              | GEP-NECs (M:W) | Age (range) | LD: ED <sup>g</sup> (n) | Lymph Met. (n) | Distant Met. (n) | Ki-67% (Range)               | SC: LC (n)        | N Positive: Syn/CgA/ NSE/CD56/ p53 | OS Months (Range)            |
|---------------------------------------|-------------|----|----|----|----|----|----|----|----|-------|-----------------|----------------|-------------|-------------------------|----------------|------------------|------------------------------|-------------------|------------------------------------|------------------------------|
| Jin S. [86] (2011, China)             | 2004–2008   | 1  | 2  | 2  | 4  | 0  | 0  | 0  | 0  | 0     | 0               | 9 (NA)         | NA          | NA                      | NA             | 9                | NA                           | 9 <sup>h</sup> :0 | NA                                 | NA                           |
| Oh S. [110] (2011, Korea)             | NA          | NA | NA | NA | NA | NA | NA | NA | NA | NA    | NA              | 6 (NA)         | NA          | NA                      | NA             | 6                | NA                           | NA                | NA                                 | NA                           |
| Sclafani F. [74] (2011, Italy)        | 1997–2007   | 2  | 2  | 1  | 0  | 0  | 1  | 0  | 0  | 0     | 0               | 6 (3:3)        | (34–78)     | NA                      | NA             | NA               | NA                           | NA                | NA                                 | NA                           |
| Welin S. [108] (2011, Sweden, Norway) | 2004–2009   | 10 | 5  | 2  | 0  | 0  | 0  | 0  | 0  | 0     | NA <sup>d</sup> | 17 (NA)        | NA          | NA                      | NA             | 17               | NA                           | NA                | NA                                 | NA                           |
| Cho M.Y. [2] (2012, Korea)            | 2000–2009   | NA | NA | NA | NA | NA | NA | NA | NA | NA    | NA              | 72 (NA)        | NA          | NA                      | NA             | NA               | NA                           | NA                | NA                                 | 5-year survival: 42.96%      |
| Faggiano A. [68] (2012, Italy)        | 1990–2007   | 19 | 7  | 7  | 0  | 0  | 2  | 0  | 0  | 0     | NA <sup>d</sup> | 35 (NA)        | NA          | NA                      | NA             | NA               | NA                           | NA                | NA                                 | NA                           |
| Hentic O. [85] (2012, France)         | 2000–2010   | 10 | 2  | 0  | 0  | 0  | 0  | 0  | 6  | 1     | 0               | 19 (7:12)      | NA          | NA                      | NA             | 18               | M <sup>1</sup> : 50 (21–100) | 11:6 (2NA)        | CgA: 14/17                         | M <sup>1</sup> : 14 (1.6–30) |
| Knösel T. [53] (2012, Germany)        | NA          | NA | NA | NA | NA | NA | NA | NA | NA | NA    | NA              | 29 (NA)        | NA          | NA                      | NA             | NA               | NA                           | NA                | NA                                 | 5-year survival: 31% ± 9%    |

Table S1. Cont.

| Author (Year, Country)                  | Time Period | P  | CR | S  | O  | GB | SI | A  | L  | Other | UK              | GEP-NECs (M:W) | Age (range)                                     | LD:ED <sup>g</sup> (n) | Lymph Met. (n) | Distant Met. (n)     | Ki-67% (Range) | SC:LC (n)               | N Positive: Syn/CgA/NSE/CD56/p53 | OS Months (Range)                                   |
|-----------------------------------------|-------------|----|----|----|----|----|----|----|----|-------|-----------------|----------------|-------------------------------------------------|------------------------|----------------|----------------------|----------------|-------------------------|----------------------------------|-----------------------------------------------------|
| Korse C.M. [95] (2012, The Netherlands) | 1994–2009   | 9  | 5  | 0  | 0  | 0  | 0  | 0  | 0  | 0     | NA <sup>d</sup> | 14 (NA)        | NA                                              | NA                     | NA             | NA                   | NA             | 2:12                    | NA                               | NA                                                  |
| Nakano K. [118] (2012, Japan)           | 2005–2011   | NA | NA | NA | NA | NA | NA | NA | NA | NA    | NA <sup>d</sup> | 9 (NA)         | NA                                              | NA                     | NA             | NA                   | NA             | NA                      | NA                               | NA                                                  |
| Olsen I.H. [117] (2012, Denmark)        | 2007–2009   | 4  | 6  | 0  | 3  | 0  | 2  | 0  | 0  | 0     | NA <sup>d</sup> | 15 (NA)        | NA                                              | NA                     | NA             | 15                   | (20–100)       | NA                      | NA                               | NA                                                  |
| Olsen I.H. [122] (2012, Denmark)        | NA          | 7  | 5  | 3  | 3  | 0  | 0  | 0  | 0  | 0     | NA <sup>d</sup> | 18 (NA)        | NA                                              | NA                     | NA             | 18                   | (20–NA)        | NA                      | NA                               | NA                                                  |
| Quinn A.M. [78] (2012, Manchester, UK)  | 1994–2003   | 0  | 1  | 2  | 3  | 0  | 0  | 0  | 0  | 0     | 0               | 6 (NA)         | NA                                              | NA                     | NA             | NA                   | NA             | 5 <sup>h</sup> :0, 1 NA | Syn: 5/6                         | NA                                                  |
| Terashima T. [115] (2012, Japan)        | 2000–2008   | 9  | 0  | 10 | 8  | 4  | 0  | 0  | 3  | 0     | NA <sup>d</sup> | 34 (23:11)     | M <sup>1</sup> : 46.5–63.5 (27–79) <sup>i</sup> | 0:34 <sup>h</sup>      | 18             | 34 <sup>h</sup> (ED) | NA             | 34 <sup>h</sup> :0      | NA                               | M <sup>1</sup> : 7.8–14.9 (±1.49–14.9) <sup>i</sup> |





Table S1. Cont.

| Author (Year, Country)           | Time Period | P        | CR        | S        | O         | GB              | SI       | A      | L       | Other    | UK              | GEP-NECs (M:W)            | Age (range)                   | LD: ED <sup>g</sup> (n) | Lymph Met. (n) | Distant Met. (n) | Ki-67% (Range)                | SC: LC (n) | N Positive: Syn/CgA/NSE/CD56/p53 | OS Months (Range)     |
|----------------------------------|-------------|----------|-----------|----------|-----------|-----------------|----------|--------|---------|----------|-----------------|---------------------------|-------------------------------|-------------------------|----------------|------------------|-------------------------------|------------|----------------------------------|-----------------------|
| Olsen I.H. [124] (2014, Denmark) | NA          | 2        | 1         | 0        | 8         | 0               | 2        | 0      | 0       | 0        | NA <sup>d</sup> | 13 (NA)                   | NA                            | NA                      | NA             | 13               | NA                            | NA         | NA                               | NA                    |
| Yamaguchi T. [92] (2014, Japan)  | 2000–2011   | 35       | 31        | 70       | 85        | 31 <sup>k</sup> | 6        | 0      | NA      | 0        | 0               | 258 <sup>f</sup> (182:76) | M <sup>1</sup> : 62.5 (26–81) | NA                      | 131            | 219              | (43 >55%, 27:20–54%) (188 NA) | 122: NA    | Syn: 204/258, CgA: 172/258       | M <sup>1</sup> : 11.5 |
| TOTAL <sup>c</sup>               | -           | 744/4904 | 1122/4904 | 702/4904 | 1368/4904 | 66/4904         | 154/4904 | 4/4904 | 41/4904 | 601/4904 | 102/4904        | 7988 (989:890 /1879)      | -                             | -                       | -              | -                | -                             | -          | -                                | -                     |

<sup>a</sup> Prospective study, all other studies are retrospective or not stated; <sup>b</sup> Might not be exact numbers: extrapolated from incidence rates; <sup>c</sup> Total after removal of possible overlapping cohorts (*i.e.*, if cohorts are from the same hospital and if it is not clearly stated in the article that patients have not been used in previous studies); <sup>d</sup> Can have a number of unknown NECs in a mixed location cohort but without specification of gastroenteropancreatic metastases; <sup>e</sup> Only information for 16 patients; <sup>f</sup> 21 MANECs included; <sup>g</sup> LD (Limited Disease): confined to a localized anatomic region/organ of origin with locoregional lymph node involvement, (encompassable within one (tolerable) radiation therapy treatment port/radiation field), ED (Extensive Disease): beyond LD; <sup>h</sup> Part of inclusion criteria; <sup>i</sup> Variation due to no group value, range of values from different primary sites; <sup>j</sup> includes liver and gallbladder (distribution NA); <sup>k</sup> hepatobiliary system (distribution NA); GEP-NEC: Gastroenteropancreatic neuroendocrine carcinoma (includes WHO 2010 definition, WHO 2000/2004 definition; poorly differentiated endocrine carcinomas (PDEC), small cell carcinomas, large cell carcinomas and anaplastic/high grade carcinomas); Other NEC: neuroendocrine carcinoma/poorly differentiated carcinoma/small cell carcinoma of sites other than the gastroenteropancreatic system; NET: neuroendocrine tumour/well differentiated endocrine tumour/well differentiated carcinoma/low grade tumour; NA: Not Available (if the study has a larger cohort with locations other than the GEP-system, with values for the whole group but none specific for GEP-NECs, these values are marked as NA); P: N Pancreas, CR: N Colorectum, S: N Stomach, O: N Oesophagus, GB: N Gallbladder, SI: N Small Intestine, A: N Appendix, L: N Liver, UK: N Unknown; M: N Men, W: N Women; M<sup>1</sup>: Median, M<sup>2</sup>: Mean; LC: Large Cell, SC: Small Cell; Syn: Synaptophysin, CgA: Chromogranin A, NSE: Neuron Specific Enolase; OS: Overall Survival; Met.: Metastases.

**Table S2.** Overview of Immunohistochemistry and Molecular Markers.

| Author<br>(Year,<br>Country)                     | Time<br>Period | n GEP-<br>NEC (°)     | Ki-67%<br>(Range)                     | n SC:<br>n LC      | IHC: n<br>syn<br>Positive | IHC: n<br>CgA<br>Positive | IHC: n<br>NSE<br>Positive | IHC: n<br>CD56<br>Positive | IHC: n<br>p53<br>Positive  | IHC: n<br>p16<br>Positive | IHC: n<br>TTF-1<br>Positive | IHC: n<br>TS<br>Positive | IHC: n<br>mTOR<br>Positive | Other n<br>IHC<br>Positive | MA: n<br>LOH<br>or AI<br>p53 | MA: n<br>LOH or<br>AI p3 | MA: n<br>LOH<br>or AI<br>MEN-1 | MA: n<br>LOH<br>or AI<br>other | Other |
|--------------------------------------------------|----------------|-----------------------|---------------------------------------|--------------------|---------------------------|---------------------------|---------------------------|----------------------------|----------------------------|---------------------------|-----------------------------|--------------------------|----------------------------|----------------------------|------------------------------|--------------------------|--------------------------------|--------------------------------|-------|
| Moertel<br>C.G. [114]<br>(1991,<br>USA)          | 1987–<br>1990  | 17 (18 <sup>b</sup> ) | NA                                    | NA:NA              | 2/4 <sup>b</sup><br>(50%) | 2/4 <sup>b</sup><br>(50%) | 2/4 <sup>b</sup><br>(50%) | -                          | -                          | -                         | -                           | -                        | -                          | -                          | -                            | -                        | -                              | -                              | -     |
| Kimura H.<br>[14] (1999,<br>Japan)               | 1981–<br>1994  | 14                    | PCNA: 72 ±<br>11.6 (53–91)            | 14 <sup>d</sup> :0 | -                         | -                         | -                         | -                          | 8/14<br>(57%)              | -                         | -                           | -                        | -                          | -                          | -                            | -                        | -                              | -                              | -     |
| Moyana<br>T.N. [44]<br>(2000,<br>Canada)         | 1964–<br>NA    | 5 (58 <sup>°</sup> )  | “extensive<br>areas of<br>positivity” | NA:NA              | -                         | -                         | -                         | -                          | 7/58 <sup>c</sup><br>(12%) | -                         | -                           | -                        | -                          | -                          | -                            | -                        | -                              | -                              | -     |
| Ordóñez<br>N.G. [36]<br>(2000,<br>USA)           | NA             | 13                    | NA                                    | 13 <sup>d</sup> :0 | -                         | -                         | -                         | -                          | -                          | -                         | 3/13<br>(23%)               | -                        | -                          | CK-20:<br>0/13<br>(0%)     | -                            | -                        | -                              | -                              | -     |
| Cheuk W.<br>[35] (2001,<br>Hong<br>Kong,<br>USA) | NA             | 15                    | NA                                    | 15 <sup>d</sup> :0 | -                         | -                         | -                         | -                          | -                          | -                         | 8/15<br>(53%)               | -                        | -                          | CK-20:<br>0/15<br>(0%)     | -                            | -                        | -                              | -                              | -     |

Table S2. Cont.

| Author<br>(Year,<br>Country)        | Time<br>Period | n GEP-<br>NEC (%) | Ki-67%<br>(Range) | n SC:<br>n LC      | IHC: n<br>syn<br>Positive | IHC: n<br>CgA<br>Positive | IHC: n<br>NSE<br>Positive | IHC: n<br>CD56<br>Positive | IHC: n<br>p53<br>Positive | IHC: n<br>p16<br>Positive | IHC: n<br>TTF-1<br>Positive | IHC: n<br>TS<br>Positive | IHC: n<br>mTOR<br>Positive | Other n<br>IHC<br>Positive        | MA: n<br>LOH<br>or AI<br>p53 | MA: n<br>LOH or<br>AI p3 | MA: n<br>LOH<br>or AI<br>MEN-1 | MA: n<br>LOH<br>or AI<br>other                                       | Other |
|-------------------------------------|----------------|-------------------|-------------------|--------------------|---------------------------|---------------------------|---------------------------|----------------------------|---------------------------|---------------------------|-----------------------------|--------------------------|----------------------------|-----------------------------------|------------------------------|--------------------------|--------------------------------|----------------------------------------------------------------------|-------|
| Dacic S.<br>[41] (2002,<br>USA)     | NA             | 5                 | NA                | 5:0                | -                         | -                         | -                         | -                          | -                         | -                         | -                           | -                        | -                          | -                                 | 4/4<br>(100%)                | -                        | -                              | P16:<br>4/7 <sup>i</sup><br>(57%),<br>L-myc:<br>5/5,<br>PTEN:<br>4/4 | -     |
| Pizzi S.<br>[38] (2003,<br>Italy)   | NA             | 24                | (5–80)            | NA:NA              | -                         | -                         | -                         | -                          | 14/24<br>(58%)            | 14/24<br>(58%)            | -                           | -                        | -                          | Loss of<br>Rb:<br>13/24<br>(54%)  | 18/22<br>(82%)               | 13/23<br>(57%)           | 11/23<br>(48%)                 | 11q:<br>9/14,<br>18q:<br>11/23                                       | -     |
| Brenner B.<br>[7] (2004,<br>USA)    | 1980–<br>2002  | 64                | NA                | 64 <sup>d</sup> :0 | -                         | -                         | -                         | -                          | -                         | -                         | -                           | -                        | -                          | -                                 | -                            | -                        | -                              | -                                                                    | -     |
| Furlan D.<br>[39] (2004,<br>Italy)  | NA             | 14                | (25–70)           | NA:NA              | -                         | -                         | -                         | -                          | -                         | -                         | -                           | -                        | -                          | -                                 | 12/13<br>(92%)               | 5/13<br>(38%)            | 5/10<br>(50%)                  | -                                                                    | -     |
| La Rosa S.<br>[58] (2004,<br>Italy) | NA             | 27                | NA                | NA:NA              | -                         | -                         | -                         | -                          | -                         | -                         | -                           | -                        | -                          | Nuclear<br>CDX2:<br>3/27<br>(11%) | -                            | -                        | -                              | -                                                                    | -     |



Table S2. Cont.

| Author<br>(Year,<br>Country)               | Time<br>Period | n GEP-<br>NEC (#)     | Ki-67%<br>(Range) | n SC:<br>n LC     | IHC: n<br>syn<br>Positive | IHC: n<br>CgA<br>Positive | IHC: n<br>NSE<br>Positive | IHC: n<br>CD56<br>Positive | IHC: n<br>p53<br>Positive | IHC: n<br>p16<br>Positive | IHC: n<br>TTF-1<br>Positive | IHC: n<br>TS<br>Positive | IHC: n<br>mTOR<br>Positive | Other n<br>IHC<br>Positive                     | MA: n<br>LOH<br>or AI<br>p53 | MA: n<br>LOH or<br>AI p3 | MA: n<br>LOH<br>or AI<br>MEN-1 | MA: n<br>LOH<br>or AI<br>other | Other                                                       |
|--------------------------------------------|----------------|-----------------------|-------------------|-------------------|---------------------------|---------------------------|---------------------------|----------------------------|---------------------------|---------------------------|-----------------------------|--------------------------|----------------------------|------------------------------------------------|------------------------------|--------------------------|--------------------------------|--------------------------------|-------------------------------------------------------------|
| Furlan D.<br>[43] (2005,<br>Italy)         | NA             | 21 (36 <sup>b</sup> ) | (26–70)           | 1:6 (14<br>mixed) | -                         | -                         | -                         | -                          | 11/14<br>(79%)            | -                         | -                           | -                        | -                          | -                                              | 19/20<br>(95%)               | 9/18<br>(50%)            | -                              | -                              | -                                                           |
| Grabowski<br>P. [45]<br>(2005,<br>Germany) | 1981–<br>2001  | 10                    | (>15–NA)          | NA:NA             | -                         | -                         | -                         | -                          | -                         | -                         | -                           | -                        | -                          | Survivin1:<br>10/10<br>(100%)                  | -                            | -                        | -                              | -                              | -                                                           |
| Pizzi S.<br>[55] (2005,<br>Italy)          | NA             | 11                    | NA                | NA:NA             | -                         | -                         | -                         | -                          | -                         | -                         | -                           | -                        | -                          | Hyper-<br>expression<br>CyD1:<br>2/11<br>(18%) | -                            | 4/9<br>(44%)             | -                              | -                              | RASSF1<br>A<br>methylat<br>ion: 2/11<br>(18%)               |
| Shida T.<br>[50] (2005,<br>Japan)          | 1999–<br>2004  | 10                    | NA                | 6:4               | 7/10<br>(70%)             | 4/10<br>(40%)             | -                         | -                          | -                         | -                         | -                           | -                        | -                          | -                                              | -                            | -                        | -                              | -                              | mRNA:<br>8/10<br>intense<br>hASH1,<br>1/10<br>mild<br>hASH1 |
| Ishikubo T.<br>[54] (2006,<br>Japan)       | NA             | 23                    | NA                | NA:NA             | -                         | -                         | -                         | -                          | -                         | -                         | -                           | -                        | -                          | c-kit:<br>6/23<br>(26%)                        | -                            | -                        | -                              | -                              | -                                                           |

Table S2. Cont.

| Author<br>(Year,<br>Country)               | Time<br>Period | n GEP-<br>NEC (#) | Ki-67%<br>(Range)                                   | n SC:<br>n LC | IHC: n<br>syn<br>Positive | IHC: n<br>CgA<br>Positive | IHC: n<br>NSE<br>Positive | IHC: n<br>CD56<br>Positive | IHC: n<br>p53<br>Positive | IHC: n<br>p16<br>Positive | IHC: n<br>TTF-1<br>Positive | IHC: n<br>TS<br>Positive | IHC: n<br>mTOR<br>Positive | Other n<br>IHC<br>Positive                                             | MA: n<br>LOH<br>or AI<br>p53 | MA: n<br>LOH or<br>AI p3 | MA: n<br>LOH<br>or AI<br>MEN-1 | MA: n<br>LOH<br>or AI<br>other | Other                                      |
|--------------------------------------------|----------------|-------------------|-----------------------------------------------------|---------------|---------------------------|---------------------------|---------------------------|----------------------------|---------------------------|---------------------------|-----------------------------|--------------------------|----------------------------|------------------------------------------------------------------------|------------------------------|--------------------------|--------------------------------|--------------------------------|--------------------------------------------|
| Li A.F.Y.<br>[42] (2006,<br>Taiwan)        | 1985–<br>2004  | 22                | NA                                                  | NA:NA         | -                         | -                         | -                         | -                          | 16/22<br>(73%)            | 17/22<br>(77%)            | -                           | -                        | -                          | c-kit:<br>0/22<br>(0%)                                                 | -                            | -                        | -                              | -                              | -                                          |
| Uccella S.<br>[37] (2006,<br>Italy)        | 1982–<br>2004  | 28                | NA                                                  | NA:NA         | -                         | -                         | -                         | -                          | -                         | -                         | -                           | -                        | -                          | VMAT2:<br>17/28<br>(61%)<br>HDC:<br>13/22<br>(59%)                     | -                            | -                        | -                              | -                              | -                                          |
| Lee H. [70]<br>(2007,<br>Korea)            | 1996–<br>2005  | 12                | Mean large<br>cell: 59.6,<br>mean small<br>cell: 56 | 6:6           | 8/9<br>(89%)              | 3/9<br>(33%)              | -                         | -                          | 5/9<br>(56%)              | -                         | 0/9 (0%)                    | -                        | -                          | Gastrin:<br>0/9 (0%)<br>SS: 0/9<br>(0%)                                | -                            | -                        | -                              | -                              | -                                          |
| Ceppi P.<br>[47] (2008,<br>Italy)          | 1992–<br>2006  | 8                 | NA                                                  | NA:NA         | -                         | -                         | -                         | -                          | -                         | -                         | -                           | 6/8<br>(75%)             | -                          | -                                                                      | -                            | -                        | -                              | -                              | TS<br>mRNA:<br>median<br>18.7 (3–<br>49.5) |
| Grabowski<br>P. [46]<br>(2008,<br>Germany) | 1981–<br>2001  | 10                | NA                                                  | NA:NA         | -                         | -                         | -                         | -                          | -                         | -                         | -                           | -                        | -                          | High<br>cyclin E:<br>7/19<br>(37%)<br>High<br>p53<br>p27: 0/27<br>(0%) | -                            | -                        | -                              | -                              | PCR:<br>1/10<br>(10%)<br>p53<br>mutation   |

Table S2. Cont.

| Author<br>(Year,<br>Country)        | Time<br>Period | n GEP-<br>NEC (%) | Ki-67%<br>(Range) | n SC:<br>n LC           | IHC: n<br>syn<br>Positive | IHC: n<br>CgA<br>Positive | IHC: n<br>NSE<br>Positive | IHC: n<br>CD56<br>Positive | IHC: n<br>p53<br>Positive | IHC: n<br>p16<br>Positive | IHC: n<br>TTF-1<br>Positive | IHC: n<br>TS<br>Positive | IHC: n<br>mTOR<br>Positive | Other n<br>IHC<br>Positive                                                       | MA: n<br>LOH<br>or AI<br>p53 | MA: n<br>LOH or<br>AI p3 | MA: n<br>LOH<br>or AI<br>MEN-1 | MA: n<br>LOH<br>or AI<br>other | Other |
|-------------------------------------|----------------|-------------------|-------------------|-------------------------|---------------------------|---------------------------|---------------------------|----------------------------|---------------------------|---------------------------|-----------------------------|--------------------------|----------------------------|----------------------------------------------------------------------------------|------------------------------|--------------------------|--------------------------------|--------------------------------|-------|
| Shia, J.<br>[29] (2008,<br>USA)     | NA             | 65                | NA                | 23:31<br>(+11<br>mixed) | 56/65<br>(87%)            | 42/65<br>(65%)            | -                         | 47/65<br>(72%)             | -                         | -                         | -                           | -                        | -                          | -                                                                                | -                            | -                        | -                              | -                              | -     |
| Shida T.<br>[51] (2009,<br>Japan)   | 1999–<br>2007  | 14                | (18–82)           | 8:6                     | 10/14<br>(71%)            | 7/14<br>(50%)             | -                         | -                          | -                         | -                         | -                           | -                        | -                          | Mash1:<br>0/14<br>(0%),<br>Neuro D:<br>11/14<br>(79%)                            | -                            | -                        | -                              | -                              | -     |
| Shida T.<br>[56] (2009,<br>Japan)   | 1999–<br>2007  | 9                 | NA                | 3:6                     | -                         | -                         | -                         | -                          | -                         | -                         | -                           | -                        | 6/9<br>(67%)               | -                                                                                | -                            | -                        | -                              | -                              | -     |
| Catena L.<br>[57] (2010,<br>Italy)  | 1984–<br>2009  | 30                | NA                | NA:NA                   | -                         | -                         | -                         | -                          | -                         | -                         | -                           | -                        | 80%                        | -                                                                                | -                            | -                        | -                              | -                              | -     |
| Li A.F.Y.<br>[16] (2010,<br>Taiwan) | 1989–<br>2009  | 42                | NA                | 42 <sup>d</sup> :0      | 42/42<br>(100%)           | 9/41<br>(22%)             | 42/42<br>(100%)           | 26/42<br>(62%)             | -                         | -                         | 9/41<br>(22%)               | -                        | -                          | CK8:<br>39/42<br>(93%),<br>AE1/AE3:<br>32/42<br>(76%),<br>EMA:<br>30/42<br>(71%) | -                            | -                        | -                              | -                              | -     |



Table S2. Cont.

| Author<br>(Year,<br>Country)                     | Time<br>Period | n GEP-<br>NEC (%) | Ki-67%<br>(Range) | n SC:<br>n LC  | IHC: n<br>syn<br>Positive | IHC: n<br>CgA<br>Positive | IHC: n<br>NSE<br>Positive | IHC: n<br>CD56<br>Positive | IHC: n<br>p53<br>Positive | IHC: n<br>p16<br>Positive | IHC: n<br>TTF-1<br>Positive | IHC: n<br>TS<br>Positive | IHC: n<br>mTOR<br>Positive | Other n<br>IHC<br>Positive                                                                                                                                  | MA: n<br>LOH<br>or AI<br>p53 | MA: n<br>LOH or<br>AI p3 | MA: n<br>LOH<br>or AI<br>MEN-1 | MA: n<br>LOH<br>or AI<br>other | Other |
|--------------------------------------------------|----------------|-------------------|-------------------|----------------|---------------------------|---------------------------|---------------------------|----------------------------|---------------------------|---------------------------|-----------------------------|--------------------------|----------------------------|-------------------------------------------------------------------------------------------------------------------------------------------------------------|------------------------------|--------------------------|--------------------------------|--------------------------------|-------|
| Quinn<br>A.M. [78]<br>(2012, UK)                 | 1994–<br>2003  | 6                 | NA                | 5:0<br>(1 NA)  | 5/6<br>(83%)              | -                         | -                         | -                          | -                         | -                         | 3/6<br>(50%)                | -                        | -                          | 34βE12:<br>0/7 (0%)                                                                                                                                         | -                            | -                        | -                              | -                              | -     |
| Delektorsk<br>aya V.V.<br>[67] (2013,<br>Russia) | 1994–<br>2011  | 23                | (23–80)           | 4:4<br>(15 NA) | -                         | -                         | -                         | -                          | 12/23<br>(52%)            | -                         | 1/4<br>(25%)                | -                        | -                          | CDX-2:<br>5/8<br>(63%)                                                                                                                                      | -                            | -                        | -                              | -                              | -     |
| Lee H.S.<br>[48] (2013,<br>Korea)                | NA             | 32                | NA                | NA:NA          | -                         | -                         | -                         | -                          | -                         | -                         | -                           | 30/32<br>(94%)           | -                          | E2F1:<br>22/32<br>(69%),<br>Rb:<br>17/32<br>(53%),<br>p18: 6/32<br>(19%),<br>p21:<br>24/32<br>(75%),<br>p27:<br>14/32<br>(44%),<br>menin:<br>29/32<br>(91%) | -                            | -                        | -                              | -                              | -     |



Table S2. Cont.

| Author<br>(Year,<br>Country)             | Time<br>Period | n GEP-<br>NEC (°) | Ki-67%<br>(Range)     | n SC:<br>n LC | IHC: n<br>syn<br>Positive       | IHC: n<br>CgA<br>Positive       | IHC: n<br>NSE<br>Positive      | IHC: n<br>CD56<br>Positive | IHC: n<br>p53<br>Positive      | IHC: n<br>p16<br>Positive | IHC: n<br>TTF-1<br>Positive  | IHC: n<br>TS<br>Positive | IHC: n<br>mTOR<br>Positive | Other n<br>IHC<br>Positive | MA: n<br>LOH<br>or AI<br>p53 | MA: n<br>LOH or<br>AI p3    | MA: n<br>LOH<br>or AI<br>MEN-1 | MA: n<br>LOH<br>or AI<br>other | Other |
|------------------------------------------|----------------|-------------------|-----------------------|---------------|---------------------------------|---------------------------------|--------------------------------|----------------------------|--------------------------------|---------------------------|------------------------------|--------------------------|----------------------------|----------------------------|------------------------------|-----------------------------|--------------------------------|--------------------------------|-------|
| Yamaguchi<br>T. [92]<br>(2014,<br>Japan) | 2000–<br>2011  | 258 <sup>f</sup>  | (>20–NA) <sup>g</sup> | 122:NA        | 204/258<br>(79%)                | 172/258<br>(67%)                | -                              | -                          | -                              | -                         | -                            | -                        | -                          | -                          | -                            | -                           | -                              | -                              | -     |
| TOTAL                                    | -              | -                 | -                     | -             | 672/762<br>(88%) <sup>b,h</sup> | 576/768<br>(75%) <sup>b,h</sup> | 77/120<br>(64%) <sup>b,h</sup> | 85/119<br>(71%)            | 73/164<br>(45%) <sup>c,h</sup> | 31/46<br>(67%)            | 32/124<br>(26%) <sup>b</sup> | 36/40<br>(90%)           | 6/9<br>(67%) <sup>+</sup>  | -                          | 41/46<br>(89%) <sup>h</sup>  | 22/41<br>(54%) <sup>h</sup> | 16/33<br>(48%)                 | -                              | -     |
|                                          |                |                   |                       |               | 647/730<br>(89%) <sup>h</sup>   | 551/736<br>(75%) <sup>h</sup>   | 45/46 <sup>h</sup><br>(98%)    |                            | 66/106 <sup>h</sup><br>(62%)   |                           | 24/116<br>(21%)              |                          |                            |                            |                              |                             |                                |                                |       |

GEP-NEC: Gastroenteropancreatic neuroendocrine carcinoma (includes WHO 2010 definition, WHO 2000/2004 definition; poorly differentiated endocrine carcinomas (PDEC), small cell carcinomas, large cell carcinomas and anaplastic/high grade carcinomas); Other NEC: neuroendocrine carcinoma/poorly differentiated carcinoma/small cell carcinoma of sites other than the gastroenteropancreatic system; NET: neuroendocrine tumour/well differentiated endocrine tumour/well differentiated carcinoma/low grade tumour; NA: Not Available; SC: Small Cell; LC: Large Cell; PCNA: proliferating cell nuclear antigen; IHC: Immunohistochemistry; Syn: synatophysin; CgA: Chromogranin A; NSE: neuron specific enolase; TTF-1: Thyroid transcription factor 1; TS: Thymidylate synthase; SS: Somatostatin; MA: Microsatellite analysis; LOH: Loss of heterozygosity; AI: Allelelic Imbalance; <sup>a</sup> includes GEP-NEC + other NEC (<sup>b</sup>) and/or NET (<sup>c</sup>) if no specific value for GEP-NECs is available; <sup>b</sup> value includes GEP-NEC and other NEC of original cohort; <sup>c</sup> value includes GEP-NECs and NETs of original cohort; <sup>d</sup> part of inclusion criteria; <sup>e</sup> only information for 16/18; <sup>f</sup> 21 MANEC included; <sup>g</sup> 73% do not have a Ki-67 index; <sup>h</sup> possible duplicates removed; <sup>i</sup> 2 tests for p16.

**Table S3.** Overview of Imaging.

| Author (Year, Country)                     | Time Period | Sample Size<br>(GEP-NEC <sup>e</sup> ) | Lymph. Met:<br>Distant Met | SRS (%)                         | FDG-PET (%)        |
|--------------------------------------------|-------------|----------------------------------------|----------------------------|---------------------------------|--------------------|
| Cimitan M. [80] (2003, Italy)              | NA          | 9                                      | NA:7                       | 4+/9 (44)                       | NA                 |
| Fjällskog M.L. [69] (2003, Sweden)         | NA          | 5                                      | NA:5                       | 3+/5 (60)                       | NA                 |
| Artale S. [107] (2005, Italy) <sup>a</sup> | 2000–2003   | 8                                      | NA:8                       | 5+/8 (63)                       | NA                 |
| Srirajaskanthan R. [105] (2009, UK)        | NA          | 6                                      | NA:NA                      | 2+/3 (67)                       | NA                 |
| Binderup T. [111] (2010, Denmark)          | 2007–2008   | 14 <sup>b</sup>                        | NA:NA                      | NA                              | 13+/14 (93)        |
| Gregory D.L. [77] (2010, Australia)        | 1996–2007   | 7                                      | NA: 1                      | NA                              | 7/7 (100)          |
| Oh S. [110] (2011, Korea)                  | NA          | 6                                      | NA:6                       | NA                              | 36/39 lesions (90) |
| Sclafani F. [74] (2011, Italy)             | 1997–2007   | 6                                      | NA:NA                      | 4+/6 (67)                       | NA                 |
| Hentic O. [85] (2012, France)              | 2000–2010   | 19                                     | NA:18                      | 2+/10, 9 NA                     | NA                 |
| Feng S.T. [82] (2013, China)               | 2009–2013   | 31                                     | 28:13                      | NA                              | NA                 |
| Lu Z.H. [87] (2013, China)                 | 2009–2011   | 18 <sup>c</sup>                        | NA:15                      | 7+/16 (44)                      | NA                 |
| Sorbye H. [4] (2013, 12 Nordic hospitals)  | 2000–2009   | 305                                    | 188:301                    | 68+/182 (37)                    | NA                 |
| TOTAL                                      |             |                                        |                            | <b>92/234 (39) <sup>d</sup></b> |                    |

<sup>a</sup> Prospective study, all others are retrospective or not stated; <sup>b</sup> Ki-67 >15%; <sup>c</sup> information for only 16; <sup>d</sup> removal of possible overlapping cohorts; <sup>e</sup> includes poorly differentiated endocrine carcinomas, small cell carcinomas, high grade NENs of the gastroenteropancreatic system; GEP-NEC: Gastroenteropancreatic neuroendocrine carcinoma (includes WHO 2010 definition, WHO 2000/2004 definition; poorly differentiated endocrine carcinomas (PDEC), small cell carcinomas, large cell carcinomas and anaplastic/high grade carcinomas); NA: Not Available; Met: Metastases.



**Table S4.** Overview of Studies including Chemotherapy in GEP-NECs.

| Study<br>Author<br>(Year,<br>Country)                     | Time<br>Period | Original<br>Cohort <i>n</i><br>(GEP-NEC <i>n</i> /<br>Other NEC <i>n</i> /<br>NET <i>n</i> ) | Median<br>Age<br>GEP-NEC<br>(Range)<br>(* (Range)) | PS<br>Used | PS ( <i>n</i> )<br>GEP-<br>NEC (*)          | Lymph<br>Met ( <i>n</i> ):<br>Distant<br>Met ( <i>n</i> ) (*) | Primary<br>Treatment ( <i>n</i> ) (*)                                    | 1st-Line<br>Chemotherapy † (*) | 2nd-Line<br>Chemotherapy † (*) | Grade 3/4 Side<br>Effects (*)                                                                                                            | Effect of<br>Primary<br>Treatment (*)              | Median PFS Mo<br>(Range) (*) (Range) | MOS Mo<br>(Range)<br>(*) (Range)         |
|-----------------------------------------------------------|----------------|----------------------------------------------------------------------------------------------|----------------------------------------------------|------------|---------------------------------------------|---------------------------------------------------------------|--------------------------------------------------------------------------|--------------------------------|--------------------------------|------------------------------------------------------------------------------------------------------------------------------------------|----------------------------------------------------|--------------------------------------|------------------------------------------|
| Van der<br>Gaast A.<br>[91] (1990,<br>The<br>Netherlands) | NA             | 11 (6/5/0)                                                                                   | NA (55<br>(26–72) <sup>b</sup> )                   | WHO        | NA (0:2,<br>1:3, 2:6 <sup>b</sup> )         | NA: 4                                                         | 4:C, 2: C+R                                                              | <b>5:CDE, 1: EP</b>            | NA                             | NA                                                                                                                                       | CR: 3, PR: 2,<br>SD: 1                             | (7–11)                               | (10–22)                                  |
| Moertel C.G.<br>[114] (1991,<br>USA)                      | 1987–<br>1990  | 45 (17/1/27)                                                                                 | NA (52<br>(24–74) <sup>b</sup> )                   | ECOG       | NA (0:5,<br>1:7, 2:5,<br>3:1 <sup>b</sup> ) | NA: NA                                                        | 17:C                                                                     | <b>17: EP</b>                  | NA                             | NA<br>(22%: nausea/vomiting,<br>35%: leucopenia,<br>15%: thrombopenia,<br>22%: anemia,<br>100%: alopecia,<br>13%: other <sup>b,c</sup> ) | NA<br>(CR:3, PR:9,<br>SD:6 <sup>b</sup> )          | NA (11 (2–21) <sup>b</sup> )         | NA (19<br>(5–36+ mo) <sup>b</sup> )      |
| Mitry E. [88]<br>(1999,<br>France)                        | 1988–<br>1997  | 53 (20/21/12)                                                                                | NA (53.4<br>(20–76) <sup>b</sup> )                 | NA         | NA                                          | NA: NA<br>(LD:ED:<br>8:33 <sup>b</sup> )                      | 20:C (58% <sup>b</sup> :prior<br>therapy: 13:S,<br>13:other C,<br>3:SSA) | <b>20: EP</b>                  | NA                             | NA (50/53 <sup>b,c</sup> :<br>20: nausea/vomiting,<br>21: leukopenia,<br>30: neutropenia,<br>6: thrombocytopenia,<br>6: anaemia)         | NA (CR:4,<br>PR:13, SD:14,<br>PD:10 <sup>b</sup> ) | NA (8.9 (6.7–13.4) <sup>b</sup> )    | NA (15 mo<br>(11.7–25 mo) <sup>b</sup> ) |

Table S4. Cont.

| Study                              | Original Cohort <i>n</i> | Median Age                        | PS Used | PS ( <i>n</i> )                      | Lymph Met ( <i>n</i> ): Distant Met ( <i>n</i> ) <sup>(a)</sup> | Primary Treatment ( <i>n</i> ) <sup>(a)</sup>                            | 1st-Line Chemotherapy <sup>f</sup> ( <i>n</i> )        | 2nd-Line Chemotherapy <sup>f</sup> ( <i>n</i> ) | Grade 3/4 Side Effects ( <i>n</i> )                                                                                                                                                                                                                                                      | Effect of Primary Treatment ( <i>n</i> )                  | Median PFS Mo (Range) <sup>(a)</sup> (Range) | MOS Mo (Range) <sup>(a)</sup> (Range) |
|------------------------------------|--------------------------|-----------------------------------|---------|--------------------------------------|-----------------------------------------------------------------|--------------------------------------------------------------------------|--------------------------------------------------------|-------------------------------------------------|------------------------------------------------------------------------------------------------------------------------------------------------------------------------------------------------------------------------------------------------------------------------------------------|-----------------------------------------------------------|----------------------------------------------|---------------------------------------|
| Fjällskog M.L. [83] (2001, Sweden) | 36 (4/0/32)              | NA (47.5 (15–70) <sup>(a)</sup> ) | NA      | NA                                   | NA: 4                                                           | 4:C (83% <sup>(c)</sup> prior therapy: 10:S, 8:R, 17: other C, 4: other) | NA (15: streptozotocin + 5-FU, 21: EP <sup>(c)</sup> ) | NA (47%: EP <sup>(c)</sup> )                    | NA (23 neutropenia, 36 alopecia <sup>(a)</sup> )                                                                                                                                                                                                                                         | OR: 2, SD: 1, PD: 0, 1 NA                                 | 7 (5–9)                                      | NA (38 <sup>(c)</sup> )               |
| Artale S. [107] (2005, Italy)      | 19 (8/0/11)              | 54 (40–77)                        | ECOG    | 0:3, 1:5                             | NA: 8                                                           | 8:C                                                                      | <b>8: L-leucovorin + 5-FU + CDDP</b>                   | NA                                              | 12.5%: neutropenia, 25%: alopecia                                                                                                                                                                                                                                                        | PR: 3, SD: 2, PD: 3                                       | 4 (1–14)                                     | 2-year survival: 66%                  |
| Hainsworth J.D. [84] (2006, USA)   | 78 (15/63/0)             | NA (58 (21–82) <sup>(b)</sup> )   | ECOG    | NA (0:8, 1:59, 2:11 <sup>(b)</sup> ) | NA: 15                                                          | 15:C                                                                     | <b>15: paclitaxel + carboplatin + VP-16</b>            | NA                                              | NA (Grade 3: 50% neutropenia, 31%: thrombopenia, 15%: anemia, 18% fatigue, 13%: infection, 10% nausea/vomiting, other: 15%. Grade 4: 51% neutropenia, 19% hospitalization (neutropenia/fever), 8% infection, 40% RBC transfusion, other: 17% 4% treatment related death <sup>(b)</sup> ) | NA (CR: 12, PR: 29, SD: 23, PD: 7, NA: 7 <sup>(b)</sup> ) | NA (7.5 <sup>(c)</sup> )                     | NA (14.5 <sup>(c)</sup> )             |

Table S4. Cont.

| Study                          | Original Cohort <i>n</i>  | Median Age                      | PS Used | PS ( <i>n</i> )                   | Lymph Met ( <i>n</i> ): Distant Met ( <i>n</i> ) <sup>(a)</sup> | Primary Treatment ( <i>n</i> ) <sup>(a)</sup>                     | 1st-Line Chemotherapy <sup>f</sup> ( <sup>(a)</sup> )                             | 2nd-Line Chemotherapy <sup>f</sup> ( <sup>(a)</sup> )                            | Grade 3/4 Side Effects ( <sup>(a)</sup> )                                                                                                                            | Effect of Primary Treatment ( <sup>(a)</sup> ) | Median PFS Mo (Range) <sup>(a)</sup> (Range) | MOS Mo (Range) <sup>(a)</sup> (Range)    |
|--------------------------------|---------------------------|---------------------------------|---------|-----------------------------------|-----------------------------------------------------------------|-------------------------------------------------------------------|-----------------------------------------------------------------------------------|----------------------------------------------------------------------------------|----------------------------------------------------------------------------------------------------------------------------------------------------------------------|------------------------------------------------|----------------------------------------------|------------------------------------------|
| Bajetta E. [120] (2007, Italy) | 2000–2005<br>40 (5/7/27)  | NA (59 (46–70) <sup>b</sup> )   | ECOG    | NA (0:8, 1:3, 2:2 <sup>b</sup> )  | NA: 5                                                           | 5:C                                                               | 5: XELOX                                                                          | NA                                                                               | NA                                                                                                                                                                   | NA (PR: 3, SD: 1, PD: 9 <sup>b</sup> )         | NA (4 (1–43) <sup>c</sup> )                  | NA (5 (1–44+) <sup>c</sup> )             |
| Correale P. [59] (2007, Italy) | 1999–2003<br>27 (10/17/0) | NA (63.5 (47–78) <sup>b</sup> ) | ECOG    | NA (≤ <sup>b</sup> )              | NA: 10                                                          | 10:C (48% <sup>b</sup> ; prior therapy: S, C)                     | 4–10: EP + lanreotide longlasting (6/27 <sup>c</sup> received 5-FU as 1st-line C) | 0–6: EP + lanreotide longlasting (6/27 <sup>c</sup> received 5-FU as 1st-line C) | NA (Grade 3: 15 thrombocytopenia, 14 anaemia, 25 neutropenia, 16 fever, 10: other <sup>c</sup> )                                                                     | NA (CR: 4, PR: 6, SD: 12, PD: 5 <sup>b</sup> ) | NA (9 <sup>b</sup> )                         | NA (relative survival: 24 <sup>b</sup> ) |
| Turner N.C. [119] (2010, UK)   | 1999–2008<br>82 (5/10/67) | NA (55 (22–82) <sup>b,c</sup> ) | NA      | NA (0–1:71, 2:11 <sup>b,c</sup> ) | NA: NA (NA:71 <sup>b,c</sup> )                                  | 5:C (30% <sup>b,c</sup> ; prior therapy: SSA, INF-alfa, R, other) | 5: 5-FU + CDDP + streptozocin                                                     | NA                                                                               | NA (grade 3: 22 nausea/vomitting, 6 fatigue, 6 diarrhea, 21 neutropenia, 6 haemoglobin, 3 platelet, 8: other. Grade 4: 4 nausea/vomitting, 9: other <sup>b,c</sup> ) | NA (PR: 9, SD: 3, PD: 3 <sup>b</sup> )         | NA (9.1 <sup>b,c</sup> )                     | NA (31.5 <sup>b,c</sup> )                |

Table S4. Cont.

| Study Author (Year, Country)          | Time Period | Original Cohort n (GEP-NEC n/ Other NEC n/ NET n) | Median Age GEP-NEC (Range) (° (Range)) | PS Used | PS (n) GEP-NEC (°)                | Lymph Met (n): Distant Met (n) (°) | Primary Treatment (n) (°)                   | 1st-Line Chemotherapy (°)                                     | 2nd-Line Chemotherapy (°)                                                            | Grade 3/4 Side Effects (°)                                                                                                                                                                                                                                                 | Effect of Primary Treatment (°)                                      | Median PFS Mo (Range) (° (Range))             | MOS Mo (Range) (° (Range))                |
|---------------------------------------|-------------|---------------------------------------------------|----------------------------------------|---------|-----------------------------------|------------------------------------|---------------------------------------------|---------------------------------------------------------------|--------------------------------------------------------------------------------------|----------------------------------------------------------------------------------------------------------------------------------------------------------------------------------------------------------------------------------------------------------------------------|----------------------------------------------------------------------|-----------------------------------------------|-------------------------------------------|
| Deutschbein T. [116] (2011, Germany)  | 2005–2009   | 18 (12/1/5)                                       | (39–75)                                | KPS     | NA (<60% <sup>bc</sup> )          | 7:11                               | 12:C (50% <sup>bc</sup> ; prior therapy: S) | <b>5: carboplatin + paclitaxel + VP-16, 9: EP<sup>c</sup></b> | NA                                                                                   | NA (carboplatin + paclitaxel + VP-16: grade 3: 25% diarrhea/nausea, 13% infection, 13% sensory neuropathy, 50% thrombocytopenia, grade 4: 12% motor neuropathy, 13% thrombocytopenia. EP: grade 4: 17% infection without neutropenia, 17% thrombocytopenia <sup>bc</sup> ) | Regime A: PR: 1, SD: 1, PD: 1, 2 NA<br>Regime B: PR: 1, SD: 3, PD: 5 | Regime A: (3.2–10.0),<br>Regime B: (2.8–26.4) | NA                                        |
| Hentic O. [100] (2011, France)        | 1997–2006   | 63 (18/0/45)                                      | 58 (33–71)                             | NA      | NA                                | NA: 18 <sup>d</sup>                | 14:C, 3:S+C, 1:C+ liver S                   | <b>17: EP, 1: other C</b>                                     | NA                                                                                   | NA                                                                                                                                                                                                                                                                         | EP: PR: 5, SD: 4, PD: 8                                              | NA                                            | 14                                        |
| Jin S. [86] (2011, China)             | 2004–2008   | 15 (9/6/0)                                        | NA (49 (31–74) <sup>b</sup> )          | ECOG    | NA (0:4, 1:10, 2:1 <sup>b</sup> ) | NA: 9                              | 9:C (other therapy NA)                      | <b>9: IP</b>                                                  | NA                                                                                   | NA (10: neutropenia, diarrhea, febrile neutropenia <sup>c</sup> )                                                                                                                                                                                                          | NA (CR: 3, PR: 7, SD: 3, PD: 2 <sup>b</sup> )                        | NA (4.5 <sup>b</sup> )                        | NA (11.4 <sup>b</sup> )                   |
| Welin S. [108] (2011, Sweden, Norway) | 2004–2009   | 25 (17/5/0)                                       | NA (55 (32–76) <sup>b</sup> )          | NA      | NA (0–2 <sup>b</sup> )            | NA: 17                             | 17:C (NA if other therapy)                  | 16-17: EP (1/24 <sup>c</sup> : doxorubicin + docetaxel)       | <b>17 temozolomide</b> as 2nd/3rd-line (18/25 2nd-line, 7/25 3rd-line <sup>c</sup> ) | NA (all treated with temozolomide: grade 3: 1 leukopenia + thrombopenia <sup>b</sup> )                                                                                                                                                                                     | NA (temozolomide: CR: 1, PR: 7, SD: 9)                               | NA (6 <sup>b</sup> )                          | NA (22, from diagnosis: 32 <sup>b</sup> ) |

Table S4. Cont.

| Study Author (Year, Country)     | Time Period | Original Cohort <i>n</i> (GEP-NEC <i>n</i> /Other NEC <i>n</i> /NET <i>n</i> ) | Median Age (Range)            | PS Used | PS ( <i>n</i> ) GEP-NEC ( <sup>a</sup> ) | Lymph Met ( <i>n</i> ): Distant Met ( <i>n</i> ) <sup>a</sup> | Primary Treatment ( <i>n</i> ) <sup>a</sup>          | 1st-Line Chemotherapy <sup>f</sup> ( <sup>a</sup> ) | 2nd-Line Chemotherapy <sup>f</sup> ( <sup>a</sup> )                           | Grade 3/4 Side Effects ( <sup>a</sup> )                                                 | Effect of Primary Treatment ( <sup>a</sup> )                                                                      | Median PFS Mo (Range) <sup>a</sup> (Range) | MOS Mo (Range) <sup>a</sup> (Range) |
|----------------------------------|-------------|--------------------------------------------------------------------------------|-------------------------------|---------|------------------------------------------|---------------------------------------------------------------|------------------------------------------------------|-----------------------------------------------------|-------------------------------------------------------------------------------|-----------------------------------------------------------------------------------------|-------------------------------------------------------------------------------------------------------------------|--------------------------------------------|-------------------------------------|
| Hentic O. [85] (2012, France)    | 2000–2010   | 19 (19/0/0)                                                                    | 53 (29–78)                    | ECOG    | 0–1:14, 2:5                              | NA: 18                                                        | 19:C                                                 | 19: EP                                              | <b>19: FOLFIRI</b>                                                            | 3: neutropenia, 3: diarrhea (2nd-line FOLFIRI)                                          | OR: 6, SD: 6, PD: 7 (2nd-line FOLFIRI)                                                                            | 4                                          | 18                                  |
| Nakano K. [118] (2012, Japan)    | 2005–2011   | 44 (9/35/0)                                                                    | NA (60 (20–80) <sup>b</sup> ) | NA      | NA (0:24, 1:11, ≥2:2 <sup>b</sup> )      | NA: NA (LD:ED: 14:30 <sup>b</sup> )                           | 9:C (57% <sup>b</sup> :prior therapy: other C, S, R) | <b>0–9: IP</b> (9/44 <sup>c</sup> : prior C)        | <b>0–9: IP</b> (9/44 <sup>c</sup> : prior C)                                  | NA (grades 3/4: 19 leukopenia, 26 neutropenia, 12 thrombopenia, 7: other <sup>b</sup> ) | CR: 1, PR: 3 (OR: 22, CR: 3, PR: 19 <sup>b</sup> )                                                                | 5.1                                        | NA (1 year: 67% <sup>b</sup> )      |
| Olsen I.H. [117] (2012, Denmark) | 2007–2009   | 31 (15/16/0)                                                                   | NA (63 (33–82) <sup>b</sup> ) | WHO     | NA (0:10, 1:16, 2:5 <sup>b</sup> )       | NA: 15                                                        | 15:C                                                 | <b>15: carboplatin + VP-16 + vincristine</b>        | NA                                                                            | NA (Grade 4: 8 neutropenia, Grade 3: 7 neutropenia, 3 thrombopenia <sup>b</sup> )       | NA (CR: 3, PR: 13, SD: 8, PD: 7 <sup>b</sup> )                                                                    | NA (6.6 <sup>b</sup> )                     | NA (15.3 <sup>b</sup> )             |
| Olsen I.H. [122] (2012, Denmark) | NA          | 28 (18/10/0)                                                                   | NA (58 (32–81) <sup>b</sup> ) | WHO     | NA (0–1:22, 2:6 <sup>b</sup> )           | NA: 18                                                        | 18:C                                                 | 18: carboplatin + VP-16                             | <b>18: temozolomide as 2nd- or 3rd-line</b> (19/28: 2nd-line, 9/28: 3rd-line) | NA (Grade 3: 1 leucopenia, Grade 4: 2 thrombocytopenia <sup>b</sup> )                   | All progressed on carboplatin + VP-16 <sup>d</sup> , temozolomide: NA (CR: 0, PR: 0, SD: 6, PD: 10 <sup>b</sup> ) | NA (2.4 <sup>b</sup> )                     | NA (3.5 <sup>b</sup> )              |

Table S4. Cont.

| Study Author (Year, Country)       | Time Period | Original Cohort n (GEP-NEC n/ Other NEC n/ NET n) | Median Age GEP-NEC (Range) (° (Range)) | PS Used | PS (n) GEP-NEC (°)                   | Lymph Met (n): Distant Met (n) (°) | Primary Treatment (n) (°)                       | 1st-Line Chemotherapy <sup>f</sup> (°)   | 2nd-Line Chemotherapy <sup>f</sup> (°)    | Grade 3/4 Side Effects (°)                                        | Effect of Primary Treatment (°)    | Median PFS Mo (Range) (° (Range)) | MOS Mo (Range) (° (Range)) |
|------------------------------------|-------------|---------------------------------------------------|----------------------------------------|---------|--------------------------------------|------------------------------------|-------------------------------------------------|------------------------------------------|-------------------------------------------|-------------------------------------------------------------------|------------------------------------|-----------------------------------|----------------------------|
| Terashima T. [115] (2012, Japan)   | 2000–2008   | 41 (34/7/0)                                       | 46.5–63.5 (27–79)                      | ECOG    | 0:8, 1:25, 2:1                       | 18: 34 <sup>d</sup>                | 34:C (NA if other treatment)                    | 17: EP, 17: IP                           | NA                                        | NA                                                                | CR: 0, PR: 6, SD: 6, PD: 4, NA: 2  | NA                                | 7.8–14.9                   |
| Ahn H.K. [123] (2013, Korea)       | 2010–2012   | 37 (13/0/24)                                      | NA (55 (19–71) <sup>e</sup> )          | ECOG    | NA (0:4, 1:33 <sup>e</sup> )         | NA: NA (NA:36 <sup>e</sup> )       | 13:C (51% <sup>c</sup> :prior therapy: S, R, C) | 13: NA regime                            | 13: pazopanib                             | NA                                                                | 23% (CR+PR)                        | 5.8                               | NA                         |
| Du Z. [81] (2013, China)           | 2008–2010   | 11 (11/0/0)                                       | 53 (35–74)                             | ECOG    | 0:3, 1:7, 2:1                        | 5: 7                               | 7:C, 4:S+C                                      | 11: FOLFIRI                              | 2: EP, 1: CAV                             | 3 neutropenia, 1 thrombopenia, 2 diarrhea, 3 nausea/vomiting      | CR: 0, PR: 7, SD: 3, PD: 1         | 6.5 (2.5–17+)                     | 13 (6–40)                  |
| Ferrarotto R. [121] (2013, Brazil) | 2003–2011   | 24 (3–9/ 3–9/15)                                  | NA (56 (23–73) <sup>b,c</sup> )        | ECOG    | NA (0:5, 1:12, ≥2:7 <sup>b,c</sup> ) | NA: 3–9                            | 3–9:C (50% <sup>b,c</sup> :prior therapy: S, C) | 0–9: XELOX (12/24:XELOX as 2nd/3rd line) | 0–9: XELOX (12/24: XELOX as 2nd/3rd line) | NA (grade 3: 2 neuropathy, 2 diarrhea, 2 other <sup>b,c</sup> )   | NA (PR: 7, SD: 17 <sup>b,c</sup> ) | NA (9.8 <sup>b,c</sup> )          | NA                         |
| Lu Z.H. [87] (2013, China)         | 2009–2011   | 18 (18/0/0)                                       | 60 (31–66)                             | KPS     | <90: 44%, ≥90: 56%                   | NA: 15                             | 16:C                                            | 15: IP, 1: EP                            | 1: IP, others NA                          | 5 leukocytopenia, 9 neutropenia, 2 diarrhea, 1 nausea, 1 vomiting | CR: 1, PR: 7, SD: 3, PD: 3, 2 NA   | 5.5                               | 10.6                       |

Table S4. Cont.

| Study                                     | Time | Original Cohort <i>n</i><br>(GEP-NEC <i>n</i> /<br>Other NEC <i>n</i> /<br>NET <i>n</i> ) | Median Age<br>GEP-NEC<br>(Range)<br>(* (Range)) | PS Used | PS ( <i>n</i> )<br>GEP-<br>NEC (*) | Lymph Met ( <i>n</i> ):<br>Distant<br>Met ( <i>n</i> ) (*) | Primary Treatment ( <i>n</i> ) (*)           | 1st-Line Chemotherapy † (*)                                                                | 2nd-Line Chemotherapy † (*)                                                | Grade 3/4 Side Effects (*) | Effect of Primary Treatment (*)                                                                                                                                                                                                                                                                 | Median PFS Mo (Range) (*) (Range)                                                                                         | MOS Mo (Range) (*) (Range)  |
|-------------------------------------------|------|-------------------------------------------------------------------------------------------|-------------------------------------------------|---------|------------------------------------|------------------------------------------------------------|----------------------------------------------|--------------------------------------------------------------------------------------------|----------------------------------------------------------------------------|----------------------------|-------------------------------------------------------------------------------------------------------------------------------------------------------------------------------------------------------------------------------------------------------------------------------------------------|---------------------------------------------------------------------------------------------------------------------------|-----------------------------|
| Sorbye H. [4] (2013, 12 Nordic hospitals) | 71   | 305 (305/0/0)                                                                             | 60 (24–89)                                      | WHO     | 0:83,<br>1:133,<br>2:49,<br>3–4:27 | 188: 301                                                   | 252:pallative C,<br>53:BSC<br>(83:S + C/BSC) | <b>129: EP, 67: carboplatin + VP-16, 28: carboplatin + VP-16 + vincristine, 28: others</b> | <b>35: temozolomide, 20: taxotere-based, 44: others,</b><br>(31: 3rd-line) | NA                         | 1st-line EP:<br>CR: 2%,<br>PR: 29%,<br>SD: 37%,<br>PD: 32%,<br>1st-line carboplatin + VP-16:<br>CR: 2%,<br>PR: 28%,<br>SD: 32%,<br>PD: 38%,<br>1st -line carboplatin + VP-16 + vincristine:<br>CR: 0%,<br>PR: 44%,<br>SD: 24%,<br>PD: 32%).<br>2nd-line C:<br>RR: 18%,<br>3rd-line C:<br>RR: 7% | EP: 4 (95% CI: 3.1–4.6), carboplatin + VP-16: 4 (95% CI: 2.6–5.4), carboplatin + VP-16 + vincristine: 4 (95% CI: 3.3–4.7) | Without C: 1,<br>with C: 11 |

Table S4. Cont.

| Study                                        | Original Cohort n | Median Age        | PS Used | PS (n)                          | Lymph Met (n): Distant Met (n) (a) | Primary Treatment (n) (a)                     | 1st-Line Chemotherapy f (e)                           | 2nd-Line Chemotherapy f (e)                                    | Grade 3/4 Side Effects (a)                                                    | Effect of Primary Treatment (a)               | Median PFS Mo (Range) (a (Range)) | MOS Mo (Range) (a (Range))                                                |
|----------------------------------------------|-------------------|-------------------|---------|---------------------------------|------------------------------------|-----------------------------------------------|-------------------------------------------------------|----------------------------------------------------------------|-------------------------------------------------------------------------------|-----------------------------------------------|-----------------------------------|---------------------------------------------------------------------------|
| Vélayoudom -Céphise F.L. [90] (2013, France) | 28 (10/18/0)      | NA (55 (29–79) b) | NA      | NA                              | NA: NA (NA:86% b)                  | 10C (100% b: prior therapy: S, SSA, R, other) | <b>0–10: cisplatin-based</b> (14/28: (14/28: prior C) | <b>0–10: cisplatin-based</b> (14/28: cisplatin-based 2nd-line) | NA                                                                            | NA (CR/PR: 5, SD: 6, PD: 9 b)                 | NA                                | NA (poorly differentiated: 17 (1–113), well-differentiated: 41 (7–143) b) |
| Olsen I.H. [124] (2014, Denmark)             | 22 (13/9/0)       | NA (65 (35–77) b) | WHO     | NA (0:6, 1:10, 2:3, 3:2, 4:1 b) | NA: 13                             | 13:C (NA if other treatment)                  | NA (all exposed to carboplatin + VP-16 c)             | <b>13: topotecan</b> as 2nd/3rd/4th-line                       | NA (grade 3: 3 leukopenia, 3 thrombocytopenia, grade 4: 2 thrombocytopenia b) | NA (topotecan: CR: 0, PR: 0, SD: 5, PD: 17 b) | NA (2.1 b)                        | NA (3.2 (from topotecan study inclusion) b)                               |



Table S4. Cont.

| Study                           | Original Cohort <i>n</i> | Median Age   | PS Used | PS ( <i>n</i> ) | Lymph Met ( <i>n</i> ): Distant Met ( <i>n</i> ) <sup>(a)</sup> | Primary Treatment ( <i>n</i> ) <sup>(a)</sup> | 1st-Line Chemotherapy <sup>f</sup> ( <i>n</i> ) <sup>(a)</sup> | 2nd-Line Chemotherapy <sup>f</sup> ( <i>n</i> ) <sup>(a)</sup>                   | Grade 3/4 Side Effects ( <i>n</i> ) <sup>(a)</sup> | Effect of Primary Treatment ( <i>n</i> ) <sup>(a)</sup>                                                                                      | Median PFS Mo (Range) <sup>(a)</sup> | MOS Mo (Range) <sup>(a)</sup>                                         |
|---------------------------------|--------------------------|--------------|---------|-----------------|-----------------------------------------------------------------|-----------------------------------------------|----------------------------------------------------------------|----------------------------------------------------------------------------------|----------------------------------------------------|----------------------------------------------------------------------------------------------------------------------------------------------|--------------------------------------|-----------------------------------------------------------------------|
| Yamaguchi T. [92] (2014, Japan) | 258 (258/0/0)            | 62.5 (26–81) | ECOG    | 0–1:240, ≥2:18  | 131: 219                                                        | 76:S+C, 182:C                                 | 160: IP, 46: EP, 37: fluoro-pyrimidine-based, 18: other        | 25: amrubicin, 23: VP-16, cisplatin/ carboplatin, 21: irinotecan, 11: S-1, 5: IP | NA                                                 | IP: RR: 50%, EP: RR 28%.<br>2nd-line: amrubicin: RR 4%, VP-16, cisplatin/ carboplatin: RR 17%, irinotecan: RR: 5%, S-1: RR: 27%, IP: RR: 40% | IP: 5.2, EP: 4                       | 11.5 mo, IP: 13, EP: 7.3 (OBS different distribution of primary site) |

GEP-NEC: Gastroenteropancreatic neuroendocrine carcinoma (includes WHO 2010 definition, WHO 2000/2004 definition; poorly differentiated endocrine carcinomas (PDEC), small cell carcinomas, large cell carcinomas and anaplastic/high grade carcinomas); Other NEC: neuroendocrine carcinoma/poorly differentiated carcinoma/small cell carcinoma of sites other than the gastroenteropancreatic system; NET: neuroendocrine tumour/well differentiated endocrine tumour/well differentiated carcinoma/low grade tumour; NA: Not Available; PS: Performance Score; ECOG: Eastern Cooperative Oncology Group; KPS: Karnofsky performance status score; LD (Limited Disease): confined to a localized anatomic region/organ of origin with locoregional lymph node involvement, (encompassable within one (tolerable) radiation therapy treatment port/radiation field), ED (Extensive Disease): beyond LD; Met: Metastases; S: Surgery; C: Chemotherapy; R: Radiation; SSA: Somatostatin Analogues; BSC: Best Supportive Care; CDE: cyclophosphamide, doxorubicin, etoposide; EP: cisplatin + etoposide; 5-FU: 5-fluorouracil; CDDP: cisplatin; IP: irinotecan + cisplatin; FOLFIRI: irinotecan, leucovorin, 5-fluorouracil; CAV: cyclophosphamide + doxorubicin + vincristine; CR: Complete Response; PR: Partial Response; SD: Stable Disease; PD: Disease Progression; OR: Overall response; RR: Response Rate (CR+PR); PFS: Progression Free Survival; MOS: Median Overall Survival; Mo: months; <sup>a</sup> includes GEP-NEC + other NEC<sup>(b)</sup> and/or NET<sup>(c)</sup> if no specific value for GEP-NECs is available; <sup>b</sup> value includes GEP-NEC and other NEC of original cohort; <sup>c</sup> value includes GEP-NECs and NETs of original cohort; <sup>d</sup> part of inclusion criteria; <sup>e</sup> 2 patients received both treatments; <sup>f</sup> high-lighted: study aim/focus.

**Table S5.** Overview of Studies Including Oesophageal Neuroendocrine Carcinomas.

| Author<br>(Year,<br>Country)          | Time<br>Period | % of<br>Oesophageal<br>Carcinomas<br>that Are NECs | N<br>Oesophageal<br>NECs<br>(Me:W) | Predisposing<br>Factors | Age<br>Year<br>(Range)           | Size cm<br>(Range)             | Location<br>of Primary<br>Tumour<br>(U:M:L) | Symptoms<br>(n Dysphagia/<br>Weight Loss/<br>Pain/Other) | Symptom<br>Duration<br>Mo<br>(Range) | n LD:<br>n ED | n<br>Lymph.<br>Met. | n Distant<br>Met. at<br>Presentation/<br>Study Start<br>(Sites) | n SC:<br>n LC      | n + Other<br>Histological<br>Components                                                       | Overall<br>Survival<br>Mo<br>(Range) | n Survivors<br>>2 Years:<br>Time to<br>Death or End<br>of Follow-Up |
|---------------------------------------|----------------|----------------------------------------------------|------------------------------------|-------------------------|----------------------------------|--------------------------------|---------------------------------------------|----------------------------------------------------------|--------------------------------------|---------------|---------------------|-----------------------------------------------------------------|--------------------|-----------------------------------------------------------------------------------------------|--------------------------------------|---------------------------------------------------------------------|
| Reyes CV<br>[131] (1980,<br>USA)      | 1947–<br>1978  | 1.7                                                | 16 (16:0)                          | NA                      | M <sup>1</sup> : 58<br>(29–74)   | Average:<br>5.39<br>(1–10)     | 2:10:4                                      | 11/12/4/<br>6 anorexia                                   | M <sup>1</sup> : 3<br>(1–12)         | NA            | NA                  | NA                                                              | 16:0               | 4 + squamous<br>component, 2 +<br>mucosubstance                                               | Average: 2<br>(1–6)                  | 0                                                                   |
| Briggs JC<br>[134] (1983,<br>U.K.)    | 1969–<br>1983  | 2.4                                                | 23 (8:15)                          | NA                      | M <sup>1</sup> : 69.8<br>(51–88) | (2.5–14/<br>"large")           | 0:5:18                                      | 22/1/1/0                                                 | (2 weeks–<br>12 mo)                  | NA            | 11                  | 4 (3 liver,<br>1 lung) <sup>w</sup>                             | 23:0<br>(16 mix)   | 2 + squamous<br>differentiation,<br>1 + glandular<br>differentiation                          | (8 days–14<br>mo)                    | 0                                                                   |
| Doherty MA<br>[138] (1983,<br>U.K.)   | NA             | NA                                                 | 6 (2:4)                            | NA                      | (69–83)                          | (5–8)                          | 0:4:2                                       | 4/4/0/<br>1 regurgitation                                | NA                                   | NA            | NA                  | 1 (liver)                                                       | 16 <sup>y</sup> :0 | NA                                                                                            | M <sup>2</sup> : 3 (NA)              | 0                                                                   |
| Mori M<br>[153] (1989,<br>Japan)      | 1972–<br>1986  | NA                                                 | 10 (8:2)                           | NA                      | M <sup>1</sup> : 65<br>(55–76)   | M <sup>1</sup> : 5.4<br>(2–13) | 1:8:1                                       | 6/0/4/<br>1 tonic-clonic<br>seizure                      | (1–8)                                | NA            | NA                  | ≥4 (1 brain),<br>NA others                                      | 10 <sup>y</sup> :0 | 2 + squamous<br>and glandular<br>differentiation,<br>5 + squamous<br>differentiation,<br>1 NA | (1–33)                               | 1: 33 mo                                                            |
| Tennvall J<br>[162] (1990,<br>Sweden) | 1970–<br>1987  | 1.25                                               | 7 (5:2)                            | NA                      | M <sup>2</sup> : 71<br>(40–89)   | (3.5–16)                       | 1:4:2                                       | 5/3/3/0                                                  | M <sup>2</sup> : 3<br>(0–12)         | NA            | NA                  | 3 (2 lung,<br>1 bone)                                           | 7 <sup>y</sup> :0  | 2 + squamous<br>carcinoma                                                                     | (1.5–23)                             | 0                                                                   |

Table S5. Cont.

| Author<br>(Year,<br>Country)          | Time<br>Period        | % of<br>Oesophageal<br>Carcinomas<br>that Are NECs | N<br>Oesophageal<br>NECs<br>(Me:W) | Predisposing<br>Factors                                                                                    | Age<br>Year<br>(Range)         | Size cm<br>(Range)                     | Location<br>of Primary<br>Tumour<br>(U:M:L) | Symptoms<br>(n Dysphagia/<br>Weight Loss/<br>Pain/Other) | Symptom<br>Duration<br>Mo<br>(Range) | n LD:<br>n ED | n<br>Lymph.<br>Met. | n Distant<br>Met. at<br>Presentation/<br>Study Start<br>(Sites) | n SC:<br>n LC      | n + Other<br>Histological<br>Components                              | Overall<br>Survival<br>Mo<br>(Range)   | n Survivors<br>>2 Years:<br>Time to<br>Death or End<br>of Follow-Up |
|---------------------------------------|-----------------------|----------------------------------------------------|------------------------------------|------------------------------------------------------------------------------------------------------------|--------------------------------|----------------------------------------|---------------------------------------------|----------------------------------------------------------|--------------------------------------|---------------|---------------------|-----------------------------------------------------------------|--------------------|----------------------------------------------------------------------|----------------------------------------|---------------------------------------------------------------------|
| Beyer KL<br>[133] (1991,<br>USA)      | 1969–<br>1989         | 4.7                                                | 11 (8:3)                           | NA                                                                                                         | M <sup>1</sup> : 64<br>(53–88) | M <sup>1</sup> : 7.9<br>(3–14)         | 2:6:3                                       | 8/0/1/<br>2 odynophagia,<br>1 hematemesis                | M <sup>1</sup> : 3.9<br>(1.5–8)      | NA            | 5                   | 9 (4 liver,<br>3 bone,<br>1 diaphragma,<br>1 lung) <sup>w</sup> | 11 <sup>y</sup> :0 | 1 + squamous<br>differentiation,<br>1 + glandular<br>differentiation | Average:<br>5.4<br>(10 days–<br>16 mo) | 0                                                                   |
| Craig SR<br>[136] (1995,<br>U.K.)     | 10<br>years<br>period | 2.7 <sup>a</sup>                                   | 16 (5:11)                          | NA                                                                                                         | M <sup>1</sup> : 60<br>(39–72) | NA                                     | NA                                          | 16/16/0/<br>2 hoarseness,<br>1 hematemesis<br>+ melena   | NA                                   | NA            | 7                   | 9 (8 distant<br>lymph nodes,<br>1 liver)                        | 16 <sup>y</sup> :0 | 5 + squamous<br>carcinoma, 1 +<br>adenocarcinoma                     | (14 days–<br>96 mo)                    | 1: 96 mo<br>(S+C)                                                   |
| Huncharek<br>M [141]<br>(1995, USA)   | 1978–<br>1993         | 1.6                                                | 13 (11:2)                          | 10: smokers,<br>mean of<br>44 pack-years<br>(10–80) <sup>f</sup> ,<br>2: heavy<br>alcohol use <sup>f</sup> | M <sup>1</sup> : 67<br>(51–78) | NA                                     | 3:7:3                                       | 12/0/2/0                                                 | NA                                   | 8:5           | NA                  | NA                                                              | 13 <sup>y</sup> :0 | NA                                                                   | M <sup>2</sup> : 7<br>(3–17)           | 1: 24 mo<br>(C+R)                                                   |
| Galanis E.<br>[9] (1997,<br>USA)      | 1974–<br>1994         | NA                                                 | 8 (NA)                             | NA                                                                                                         | NA                             | NA                                     | NA                                          | NA                                                       | NA                                   | 6:2           | NA                  | NA                                                              | 8 <sup>y</sup> :0  | NA                                                                   | NA                                     | NA                                                                  |
| Nishimaki T<br>[156] (1997,<br>Japan) | 1974–<br>1994         | 1.6                                                | 13 (12:1)                          | NA                                                                                                         | Average:<br>63.5<br>(50–78)    | M <sup>1</sup> :<br>7.4 (2.3–<br>14.0) | 0:10:3                                      | NA                                                       | NA                                   | NA            | 12                  | 6 (2 liver,<br>5 distant<br>lymph nodes)                        | 13 <sup>y</sup> :0 | NA                                                                   | M <sup>2</sup> : 10<br>(1–106)         | 2: 64, 106 mo<br>(S+C)                                              |

Table S5. Cont.

| Author<br>(Year,<br>Country)           | Time<br>Period | % of<br>Oesophageal<br>Carcinomas<br>that Are NECs | N<br>Oesophageal<br>NECs<br>(Me:W) | Predisposing<br>Factors                                                            | Age<br>Year<br>(Range)         | Size cm<br>(Range)               | Location<br>of Primary<br>Tumour<br>(U:M:L) | Symptoms<br>(n Dysphagia/<br>Weight Loss/<br>Pain/Other) | Symptom<br>Duration<br>Mo<br>(Range)  | n LD:<br>n ED | n<br>Lymph.<br>Met. | n Distant<br>Met. at<br>Presentation/<br>Study Start<br>(Sites) | n SC:<br>n LC | n + Other<br>Histological<br>Components                                                                                 | Overall<br>Survival<br>Mo<br>(Range)          | n Survivors<br>>2 Years:<br>Time to<br>Death or End<br>of Follow-Up |
|----------------------------------------|----------------|----------------------------------------------------|------------------------------------|------------------------------------------------------------------------------------|--------------------------------|----------------------------------|---------------------------------------------|----------------------------------------------------------|---------------------------------------|---------------|---------------------|-----------------------------------------------------------------|---------------|-------------------------------------------------------------------------------------------------------------------------|-----------------------------------------------|---------------------------------------------------------------------|
| Poynton AR<br>[160] (1997,<br>Ireland) | 1977–<br>1994  | 1.1                                                | 11 (4:7)                           | NA                                                                                 | M <sup>2</sup> : 71<br>(39–84) | NA                               | 0:2:9                                       | 11/5/6/0                                                 | (1–6)                                 | NA            | NA                  | 3 (NA)                                                          | 11 %:0        | NA                                                                                                                      | (22 days–<br>54 mo)                           | 0                                                                   |
| Takubo K<br>[31] (1999,<br>Japan)      | NA             | NA                                                 | 21 (15:6)                          | NA                                                                                 | (48–89)                        | NA                               | NA                                          | NA                                                       | NA                                    | NA            | 16<br>(3 NA)        | NA                                                              | 20 %:0        | 7 + <i>in situ</i><br>squamous cell<br>carcinoma, 4 +<br>squamous cell<br>carcinoma, 1 +<br>mucoepidermoid<br>carcinoma | M <sup>2</sup> : 11<br>(4–26)                 | 2: 24, 26 mo<br>(C+R, C+S)                                          |
| Bennouna J<br>[132] (2000,<br>France)  | 1993–<br>1998  | 2.8                                                | 10 (7:3)                           | 4: smokers <sup>f+</sup><br>heavy<br>drinkers <sup>g</sup> ,<br>4: smokers         | M <sup>2</sup> : 62<br>(48–73) | NA                               | 0:3:7                                       | 10/3/0/<br>1 dysphonia,<br>1 hiccup                      | (1–3)                                 | 4 %:6         | NA                  | 6 (3 liver,<br>1 bone,<br>2 distal<br>lymph nodes)              | 10 %:0        | NA                                                                                                                      | M <sup>2</sup> : 15.5<br>(2–36)               | 1: 36 mo                                                            |
| Lam KY<br>[146] (2000,<br>Hong Kong)   | 1982–<br>1996  | 1.3                                                | 20 (14:6)                          | 14: smokers <sup>h</sup><br>+ drinkers <sup>i</sup> ,<br>2: smokers,<br>1: drinker | M <sup>2</sup> : 60<br>(40–84) | M <sup>2</sup> : 7.5<br>(3.5–15) | 1:8:11                                      | 16/0/2/<br>1 shortness<br>of breath,<br>1 hematemesis    | M <sup>2</sup> : 1<br>(1–40<br>weeks) | NA            | 17                  | 3 (sites NA)                                                    | 20 %:0        | NA                                                                                                                      | M <sup>2</sup> : 3.4<br>(13 days–<br>6 years) | 1: 6 years<br>(S+C+R)                                               |
| Medgyesy<br>DC [150]<br>(2000, USA)    | 1944–<br>1997  | NA                                                 | 8 (6:2)                            | 7: smokers <sup>f</sup> ,<br>3: heavy<br>drinkers <sup>f</sup>                     | M <sup>2</sup> : 58<br>(31–79) | NA                               | 1:2:5                                       | 7/5/2/<br>2 hematemesis,<br>1 SIADH                      | NA                                    | 6:2           | NA                  | 2 (sites NA)                                                    | 8 %:0         | 0                                                                                                                       | M <sup>2</sup> : 12.5<br>(5–57)               | 2: 33, 57 mo<br>(R, S+C+R)                                          |

Table S5. Cont.

| Author<br>(Year,<br>Country)                      | Time<br>Period | % of<br>Oesophageal<br>Carcinomas<br>that Are NECs | N<br>Oesophageal<br>NECs<br>(Me:W) | Predisposing<br>Factors                               | Age<br>Year<br>(Range)              | Size cm<br>(Range) | Location<br>of Primary<br>Tumour<br>(U:M:L) | Symptoms<br>(n Dysphagia/<br>Weight Loss/<br>Pain/Other) | Symptom<br>Duration<br>Mo<br>(Range) | n LD:<br>n ED      | n<br>Lymph.<br>Met. | n Distant<br>Met. at<br>Presentation/<br>Study Start<br>(Sites) | n SC:<br>n LC | n + Other<br>Histological<br>Components                               | Overall<br>Survival<br>Mo<br>(Range) | n Survivors<br>>2 Years:<br>Time to<br>Death or End<br>of Follow-Up |
|---------------------------------------------------|----------------|----------------------------------------------------|------------------------------------|-------------------------------------------------------|-------------------------------------|--------------------|---------------------------------------------|----------------------------------------------------------|--------------------------------------|--------------------|---------------------|-----------------------------------------------------------------|---------------|-----------------------------------------------------------------------|--------------------------------------|---------------------------------------------------------------------|
| Mitani M<br>[152] (2000,<br>Japan)                | 1982–<br>1999  | 2.8                                                | 5 (5:0)                            | NA                                                    | (39–70)                             | NA                 | 2:3:0                                       | NA                                                       | NA                                   | NA                 | 3                   | NA (none<br>mentioned)                                          | 5 %:0         | 4 + squamous<br>cell carcinoma                                        | (11 mo–<br>9 years)                  | 2: 7, 9 years<br>(S, S+C+R)                                         |
| Cheuk W.<br>[35] (2001,<br>Hong Kong,<br>USA)     | NA             | NA                                                 | 7 (NA)                             | NA                                                    | NA                                  | NA                 | NA                                          | NA                                                       | NA                                   | NA                 | NA                  | NA                                                              | 7 %:0         | 1 + squamous<br>cell carcinoma                                        | NA                                   | NA                                                                  |
| Chow V<br>[180] (2001,<br>Hong Kong) <sup>o</sup> | 1991–<br>2000  | NA                                                 | 5 (4:1)                            | 4: smokers <sup>f</sup> ,<br>4: drinkers <sup>f</sup> | M <sup>1</sup> :<br>58.2<br>(40–70) | (2–12)             | 2:1:2                                       | NA                                                       | NA                                   | NA                 | 4                   | 0                                                               | 5 %:0         | NA                                                                    | (3.5–50)                             | 1: 50 mo (S)                                                        |
| Nemoto K<br>[155] (2002,<br>Japan)                | 1985–<br>1999  | 1.8                                                | 24 <sup>d</sup> (18:2)             | NA                                                    | M <sup>2</sup> : 65<br>(49–76)      | NA                 | NA                                          | NA                                                       | NA                                   | 20 <sup>g</sup> :0 | NA                  | 0                                                               | 20 %:0        | NA                                                                    | M <sup>2</sup> : 11.7                | 3: 56, 99,<br>108 mo,<br>(all S+C+R)                                |
| Osugi H<br>[158] (2002,<br>Japan)                 | 1986–<br>2000  | 2.0                                                | 9 (8:1)                            | NA                                                    | M <sup>2</sup> : 65<br>(49–71)      | NA                 | 1:3:5                                       | 8/0/0/0                                                  | NA                                   | NA                 | 8 (1 NA)            | NA <sup>w</sup>                                                 | 9 %:0         | NA                                                                    | M <sup>2</sup> : 11.0<br>(4–76 mo)   | 1: 76 mo<br>(S+C)                                                   |
| Pantvaitya<br>GH [159]<br>(2002, India)           | 1985–<br>2001  | 0.15                                               | 24 <sup>d</sup> (13:5)             | NA                                                    | M <sup>1</sup> : 62<br>(48–80)      | NA                 | 1:14:3                                      | 16/0/1/<br>1 hoarseness                                  | NA                                   | 10:8               | NA                  | 7 (5 liver,<br>1 coeliac<br>nodes)                              | 18 %:0        | 2 + epidermoid<br>differentiation,<br>1 + squamous<br>differentiation | M <sup>2</sup> : 6<br>(1–48)         | 1: 48 mo<br>(S+C+R)                                                 |

Table S5. Cont.

| Author<br>(Year,<br>Country)         | Time<br>Period | % of<br>Oesophageal<br>Carcinomas<br>that Are NECs | N<br>Oesophageal<br>NECs<br>(Me:W) | Predisposing<br>Factors                                             | Age<br>Year<br>(Range)         | Size cm<br>(Range)                | Location<br>of Primary<br>Tumour<br>(U:M:L) | Symptoms<br>(n Dysphagia/<br>Weight Loss/<br>Pain/Other) | Symptom<br>Duration<br>Mo<br>(Range) | n LD:<br>n ED | n<br>Lymph.<br>Met. | n Distant<br>Met. at<br>Presentation/<br>Study Start<br>(Sites)                              | n SC:<br>n LC | n + Other<br>Histological<br>Components     | Overall<br>Survival<br>Mo<br>(Range) | n Survivors<br>>2 Years:<br>Time to<br>Death or End<br>of Follow-Up |
|--------------------------------------|----------------|----------------------------------------------------|------------------------------------|---------------------------------------------------------------------|--------------------------------|-----------------------------------|---------------------------------------------|----------------------------------------------------------|--------------------------------------|---------------|---------------------|----------------------------------------------------------------------------------------------|---------------|---------------------------------------------|--------------------------------------|---------------------------------------------------------------------|
| Noguchi T<br>[157] (2003,<br>Japan)  | NA             | 1.4                                                | 6 (6:0)                            | NA                                                                  | M <sup>1</sup> : 70<br>(55–78) | NA                                | 0:5:1                                       | NA                                                       | NA                                   | NA            | 5                   | 3 (distant<br>lymph nodes)                                                                   | 6 %:0         | NA                                          | M <sup>1</sup> : 9.3<br>(2–24)       | 1: 24 mo (S)                                                        |
| Brenner B.<br>[7] (2004,<br>USA)     | 1980–<br>2002  | NA                                                 | 19 (NA)                            | 8/18 (smokers<br>or drinkers<br>or reflux) <sup>f</sup>             | NA                             | NA                                | NA                                          | NA                                                       | NA                                   | NA            | NA                  | NA                                                                                           | 19 %:0        | NA                                          | NA                                   | NA                                                                  |
| La Rosa S.<br>[58] (2004,<br>Italy)  | NA             | NA                                                 | 8 (7:1)                            | NA                                                                  | M <sup>1</sup> : 60<br>(45–73) | M <sup>1</sup> : 3.6<br>(2.3–5.5) | NA                                          | NA                                                       | NA                                   | NA            | NA                  | NA                                                                                           | NA            | NA                                          | NA                                   | NA                                                                  |
| Wu Z [165]<br>(2004, China)          | 1985–<br>2000  | 1.0                                                | 9 (6:3)                            | NA                                                                  | M <sup>1</sup> : 56<br>(45–66) | Average:<br>5 (3–7)               | 1:5:3                                       | 6/6/6/0                                                  | NA                                   | NA            | 7                   | 0                                                                                            | 6 %:0         | 3 + squamous<br>carcinoma<br><i>in situ</i> | (5–37)<br>3 NA                       | 1: 37 mo<br>(S+C+R)                                                 |
| Hosokawa A<br>[170] (2005,<br>Japan) | 1990–<br>2001  | 0.8                                                | 14 (14:0)                          | 13: smokers <sup>f</sup><br>+ drinkers <sup>f</sup> ,<br>1: drinker | M <sup>2</sup> : 63<br>(37–71) | 11:<br>>5 cm,<br>3: <5 cm         | 1:7:6                                       | 13/0/1/0                                                 | (1–5)                                | 3:11          | NA                  | 11 (8 cervical<br>lymph/node,<br>1 para-aortic<br>lymph node,<br>3 liver, 1 lung,<br>1 bone) | 14 %:0        | NA                                          | M <sup>2</sup> : 7.7<br>(0.6–89.1)   | 3: 24, 28.2,<br>89.1 mo<br>(C, C+R,<br>S+R)                         |
| Kim K.O.<br>[13] (2006,<br>Korea)    | 1998–<br>2005  | NA                                                 | 6 (NA)                             | NA                                                                  | NA                             | NA                                | NA                                          | NA                                                       | NA                                   | NA            | NA                  | NA                                                                                           | 6 %:0         | NA                                          | NA                                   | NA                                                                  |

Table S5. Cont.

| Author<br>(Year,<br>Country)        | Time<br>Period | % of<br>Oesophageal<br>Carcinomas<br>that Are NECs | N<br>Oesophageal<br>NECs<br>(Me:W) | Predisposing<br>Factors                                                                           | Age<br>Year<br>(Range)              | Size cm<br>(Range) | Location<br>of Primary<br>Tumour<br>(U:M:L) | Symptoms<br>(n Dysphagia/<br>Weight Loss/<br>Pain/Other) | Symptom<br>Duration<br>Mo<br>(Range) | n LD:<br>n ED | n<br>Lymph.<br>Met. | n Distant<br>Met. at<br>Presentation/<br>Study Start<br>(Sites)                                                   | n SC:<br>n LC | n + Other<br>Histological<br>Components                            | Overall<br>Survival<br>Mo<br>(Range)                      | n Survivors<br>>2 Years:<br>Time to<br>Death or End<br>of Follow-Up                |
|-------------------------------------|----------------|----------------------------------------------------|------------------------------------|---------------------------------------------------------------------------------------------------|-------------------------------------|--------------------|---------------------------------------------|----------------------------------------------------------|--------------------------------------|---------------|---------------------|-------------------------------------------------------------------------------------------------------------------|---------------|--------------------------------------------------------------------|-----------------------------------------------------------|------------------------------------------------------------------------------------|
| Li A.F.Y.<br>[42] (2006,<br>Taiwan) | 1985–<br>2004  | NA                                                 | 6 (6:0)                            | NA                                                                                                | (45–82)                             | NA                 | NA                                          | NA                                                       | NA                                   | NA            | 5                   | 0                                                                                                                 | NA            | NA                                                                 | (1–37)                                                    | 2: 32, 37 mo                                                                       |
| Uccella S.<br>[37] (2006,<br>Italy) | 1982–<br>2004  | NA                                                 | 6 (4:2)                            | NA                                                                                                | (49–73)                             | (2–5.5)<br>1 NA    | NA                                          | NA                                                       | NA                                   | NA            | NA                  | (6<br>"malignant")                                                                                                | NA            | NA                                                                 | NA                                                        | NA                                                                                 |
| Hudson E<br>[174] (2007,<br>U.K)    | 1998–<br>2005  | NA                                                 | 16 (4:12)                          | NA                                                                                                | M <sup>2</sup> :<br>68.5<br>(48–81) | NA                 | 0:3:13                                      | NA                                                       | NA                                   | 6:9<br>1 NA   | NA                  | 9 (7 liver,<br>1 lungs,<br>2 abdominal<br>lymph nodes,<br>1 spleen, 1<br>supraclavicular<br>fossa,<br>1 pancreas) | 16 y:0        | NA                                                                 | M <sup>2</sup> : 13.2<br>(0.4–104)                        | 3: 30, 48 and<br>104 mo<br>(all C+R)                                               |
| Koide N<br>[142] (2007,<br>Japan)   | 1991–<br>2005  | 3.1                                                | 10 (9:1)                           | NA                                                                                                | (51–75)                             | (3–9.5)            | 1:7:2                                       | NA                                                       | NA                                   | NA            | 10                  | 0                                                                                                                 | 10 y:0        | NA                                                                 | M <sup>2</sup> : 13.0,<br>M <sup>1</sup> : 22.7<br>(7–80) | 2: 37, 80 mo<br>(C+R, S+C)                                                         |
| Ku GY [143]<br>(2007, USA)          | 1980–<br>2005  | 1.0                                                | 25 <sup>d</sup> (18:4)             | 7: alcohol <sup>f</sup><br>and tobacco<br>use <sup>f</sup> , 2:<br>tobacco use,<br>1: alcohol use | M <sup>2</sup> : 60<br>(51–73)      | NA                 | 2:1:19                                      | 16/9/11/<br>2 bleeding                                   | NA                                   | 14:8          | NA                  | 8 (5 liver, 4<br>distant lymph<br>nodes, 1 lung,<br>1 adrenal, 1<br>bone, 1 bone<br>marrow)                       | 22 y:0        | 2 +<br>adenocarcinoma,<br>1 + squamous<br>cell, 1 +<br>sarcomatoid | M <sup>2</sup> :<br>19.8 (1.5–<br>11.2 years)             | 6: 2.2, 2.6,<br>2.6, 3.6, 5.8<br>and 11.2<br>(all C, then 5:<br>C+R,<br>1: S +C+R) |

Table S5. Cont.

| Author<br>(Year,<br>Country)         | Time<br>Period | % of<br>Oesophageal<br>Carcinomas<br>that Are NECs | N<br>Oesophageal<br>NECs<br>(Me:W) | Predisposing<br>Factors                             | Age<br>Year<br>(Range)         | Size cm<br>(Range)                     | Location<br>of Primary<br>Tumour<br>(U:M:L) | Symptoms<br>(n Dysphagia/<br>Weight Loss/<br>Pain/Other) | Symptom<br>Duration<br>Mo<br>(Range)     | n LD:<br>n ED    | n<br>Lymph.<br>Met. | n Distant<br>Met. at<br>Presentation/<br>Study Start<br>(Sites) | n SC:<br>n LC | n + Other<br>Histological<br>Components             | Overall<br>Survival<br>Mo<br>(Range)            | n Survivors<br>>2 Years:<br>Time to<br>Death or End<br>of Follow-Up         |
|--------------------------------------|----------------|----------------------------------------------------|------------------------------------|-----------------------------------------------------|--------------------------------|----------------------------------------|---------------------------------------------|----------------------------------------------------------|------------------------------------------|------------------|---------------------|-----------------------------------------------------------------|---------------|-----------------------------------------------------|-------------------------------------------------|-----------------------------------------------------------------------------|
| Lee S.S. [15]<br>(2007,<br>Korea)    | 1995–<br>2004  | NA                                                 | 7 (NA)                             | NA                                                  | NA                             | NA                                     | NA                                          | NA                                                       | NA                                       | NA               | NA                  | NA                                                              | 7 y:0         | NA                                                  | NA                                              | NA                                                                          |
| Lepage C.<br>[1] (2007,<br>U.K.)     | 1986–<br>1999  | NA                                                 | 557 (NA)                           | NA                                                  | NA                             | NA                                     | NA                                          | NA                                                       | NA                                       | NA               | NA                  | NA                                                              | 557 y:0       | NA                                                  | Relative<br>1 year<br>survival:<br>18.0%        | NA                                                                          |
| Yau KK<br>[167] (2007,<br>Hong Kong) | 1993–<br>2003  | 2.2                                                | 10 (6:4)                           | 10: smokers <sup>f</sup><br>+ drinkers <sup>f</sup> | M <sup>2</sup> : 69<br>(55–86) | (2–10)                                 | 0:7:3                                       | 10/0/0/0                                                 | (1–12<br>weeks)                          | 4:6 <sup>r</sup> | NA                  | 6 (3 distant<br>lymph., 2 liver,<br>1 brain)                    | 10 y:0        | NA                                                  | M <sup>2</sup> : 8<br>(2–62)                    | 2: 34, 62 mo<br>(C+R)                                                       |
| Yun JP [178]<br>(2007,<br>China)     | 1989–<br>2005  | 0.5                                                | 21 (16:5)                          | NA                                                  | M <sup>2</sup> : 56<br>(30–76) | M <sup>1</sup> :<br>5.8 (1.2–<br>15.5) | 1:12:8                                      | 18/0/3/0                                                 | M <sup>1</sup> : 2<br>(10 days–<br>9 mo) | NA               | 10                  | 3 (2 liver,<br>1 thyroid)                                       | 21 y:0        | 2 + well<br>differentiated<br>squamous<br>carcinoma | M <sup>2</sup> : 18.3<br>(3–71)                 | 1: 46 mo<br>(C+S),<br>5: 28–71 mo<br>(2: S+C+R,<br>1: S+C,<br>1: S+R, 1: R) |
| Chin K [169]<br>(2008, Japan)        | 1999–<br>2004  | 2.4                                                | 15 <sup>d</sup> (11:1)             | NA                                                  | M <sup>2</sup> : 66<br>(53–77) | M <sup>2</sup> : 6<br>(3–13)           | 1:7:3<br>(1 NA)                             | NA                                                       | NA                                       | NA               | NA                  | 7 (NA)                                                          | 12 y:0        | 4 + squamous<br>cell                                | M <sup>2</sup> :<br>417 days<br>(97–1626)       | 3: 1465, 1291,<br>1626 days<br>(all C+R)                                    |
| Lv J [148]<br>(2008, China)          | 1985–<br>2005  | 1.2                                                | 126 (99:27)                        | NA                                                  | M <sup>2</sup> : 58            | M <sup>2</sup> : 5.5                   | 22:78:26                                    | NA                                                       | NA                                       | 85:41            | 92                  | 41 (30 distant<br>lymph, others<br>NA)                          | 126 y: 0      | NA                                                  | M <sup>2</sup> : 12.5<br>(95% CI:<br>10.3–14.7) | 12: >5 years<br>(3: S, 1: R,<br>6: S+C, 2: R+C)                             |



Table S5. Cont.

| Author<br>(Year,<br>Country)                       | Time<br>Period | % of<br>Oesophageal<br>Carcinomas<br>that Are NECs | N<br>Oesophageal<br>NECs<br>(Me:W) | Predisposing<br>Factors | Age<br>Year<br>(Range)         | Size cm<br>(Range)             | Location<br>of Primary<br>Tumour<br>(U:M:L) | Symptoms<br>(n Dysphagia/<br>Weight Loss/<br>Pain/Other)                                       | Symptom<br>Duration<br>Mo<br>(Range) | n LD:<br>n ED                          | n<br>Lymph.<br>Met. | n Distant<br>Met. at<br>Presentation/<br>Study Start<br>(Sites)            | n SC:<br>n LC       | n + Other<br>Histological<br>Components                                     | Overall<br>Survival<br>Mo<br>(Range)                       | n Survivors<br>>2 Years:<br>Time to<br>Death or End<br>of Follow-Up |
|----------------------------------------------------|----------------|----------------------------------------------------|------------------------------------|-------------------------|--------------------------------|--------------------------------|---------------------------------------------|------------------------------------------------------------------------------------------------|--------------------------------------|----------------------------------------|---------------------|----------------------------------------------------------------------------|---------------------|-----------------------------------------------------------------------------|------------------------------------------------------------|---------------------------------------------------------------------|
| Maru DM<br>[149] (2008,<br>USA)                    | 1997–<br>2007  | NA                                                 | 42 <sup>d</sup> (35:5)             | NA                      | Average:<br>63<br>(34–82)      | NA                             | 1:5:33<br>(1 NA)                            | 18/0/0/<br>10 reflux,<br>6 symptoms<br>from<br>metastases,<br>4 hematemesis/<br>blood in stool | NA                                   | LD:<br>17<br>ED <sup>s</sup><br>(2 NA) | 21<br>NA            | 17 (8 liver,<br>4 abdominal<br>lymph nodes,<br>2 bone, 3 lung,<br>1 brain) | 13:27               | 1 + squamous<br>(SC NEC),<br>15 +<br>adenocarcinoma<br>(3 SC, 12 LC<br>NEC) | M <sup>2</sup> : 14<br>(2–49)                              | NA                                                                  |
| Shia, J. [29]<br>(2008, USA)                       | NA             | NA                                                 | 6 (NA)                             | NA                      | NA                             | NA                             | NA                                          | NA                                                                                             | NA                                   | NA                                     | NA                  | NA                                                                         | 5:0 (1<br>mixed)    | NA                                                                          | NA                                                         | NA                                                                  |
| Lepage C.<br>[79] (2009,<br>EUROCAR<br>E database) | 1985–<br>1994  | NA                                                 | 419 (NA)                           | NA                      | NA                             | NA                             | NA                                          | NA                                                                                             | NA                                   | NA                                     | NA                  | NA                                                                         | 419 <sup>y</sup> :0 | NA                                                                          | 5-year<br>relative<br>survival<br>rate: 5.3                | NA                                                                  |
| Sadanaga N<br>[171] (2009,<br>Japan)               | 1965–<br>2007  | 1.2                                                | 12 (9:3)                           | NA                      | M <sup>2</sup> : 65<br>(53–82) | M <sup>2</sup> : 5<br>(2.5–11) | 2:7:3                                       | NA                                                                                             | NA                                   | NA                                     | 7                   | 0                                                                          | 12 <sup>y</sup> :0  | NA                                                                          | M <sup>2</sup> : 7.6                                       | 1: 5 years 3 mo<br>(S, 2 years<br>after: C+R)                       |
| Wong Y.N.<br>[65] (2009,<br>U.K.)                  | 1970–<br>2004  | NA                                                 | 293 (NA)                           | NA                      | NA                             | NA                             | NA                                          | NA                                                                                             | NA                                   | Na                                     | NA                  | NA                                                                         | 293 <sup>y</sup> :0 | NA                                                                          | NA                                                         | NA                                                                  |
| Yamashita H<br>[166] (2009,<br>Japan)              | 2003–<br>2006  | NA                                                 | 21 <sup>d</sup> (6:3)              | NA                      | M <sup>2</sup> : 63<br>(54–68) | NA                             | 2:5:2                                       | 7/0/0/0                                                                                        | NA                                   | 9:0                                    | 7                   | 0                                                                          | 9 <sup>y</sup> :0   | NA                                                                          | 3-year<br>overall<br>survival<br>rate: 56%<br>(42–42.8 mo) | 2: 34.7,<br>42.8 mo<br>(C+R)                                        |

Table S5. Cont.

| Author<br>(Year,<br>Country)                 | Time<br>Period | % of<br>Oesophageal<br>Carcinomas<br>that Are NECs | N<br>Oesophageal<br>NECs<br>(Me:W) | Predisposing<br>Factors | Age<br>Year<br>(Range)         | Size cm<br>(Range) | Location<br>of Primary<br>Tumour<br>(U:M:L) | Symptoms<br>(n Dysphagia/<br>Weight Loss/<br>Pain/Other) | Symptom<br>Duration<br>Mo<br>(Range) | n LD:<br>n ED | n<br>Lymph.<br>Met. | n Distant<br>Met. at<br>Presentation/<br>Study Start<br>(Sites)                                                        | n SC:<br>n LC | n + Other<br>Histological<br>Components | Overall<br>Survival<br>Mo<br>(Range)         | n Survivors<br>>2 Years:<br>Time to<br>Death or End<br>of Follow-Up |
|----------------------------------------------|----------------|----------------------------------------------------|------------------------------------|-------------------------|--------------------------------|--------------------|---------------------------------------------|----------------------------------------------------------|--------------------------------------|---------------|---------------------|------------------------------------------------------------------------------------------------------------------------|---------------|-----------------------------------------|----------------------------------------------|---------------------------------------------------------------------|
| Atsumi K<br>[172] (2010,<br>Japan)           | 1996–<br>2007  | NA                                                 | 11 (7:4)                           | NA                      | M <sup>1</sup> : 69<br>(44–77) | NA                 | 2:5:4                                       | NA                                                       | NA                                   | 9:2           | 8                   | 2 (2 liver,<br>2 adrenal)                                                                                              | 11 %:0        | NA                                      | M <sup>2</sup> : 13.2<br>(4.2–43.6)          | 1: 24 mo<br>(C+R)                                                   |
| Brennan<br>S.M. [6]<br>(2010,<br>Australia)  | 1985–<br>2007  | NA                                                 | 20 (NA)                            | NA                      | NA                             | NA                 | NA                                          | NA                                                       | NA                                   | NA            | NA                  | NA                                                                                                                     | 20 %:0        | NA                                      | NA                                           | NA                                                                  |
| Gregory<br>D.L. [77]<br>(2010,<br>Australia) | 1996–<br>2007  | NA                                                 | 5 (NA)                             | NA                      | NA                             | NA                 | NA                                          | NA                                                       | NA                                   | 4:1           | NA                  | NA                                                                                                                     | 5 %:0         | NA                                      | NA                                           | NA                                                                  |
| Kuo CH<br>[145] (2010,<br>Taiwan)            | 1992–<br>2007  | 1.0                                                | 18 <sup>d</sup> (14:2)             | NA                      | (34–83)                        | NA                 | 1: 1: 1<br>(13 mixed)                       | 11/6/5/<br>2 odynophagia,<br>1 hoarsness                 | NA                                   | 8:8           | NA                  | 8 (3 liver,<br>3 lung,<br>3 abdominal,<br>2 bone,<br>2 abdominal,<br>1 chest wall,<br>1 neck mass,<br>1 distant lymph) | 16 %:0        | NA                                      | M <sup>2</sup> : 13.5<br>(4 days–<br>221 mo) | 3: 34, 75 and<br>221 mo<br>(all S+C)                                |

Table S5. Cont.

| Author<br>(Year,<br>Country)        | Time<br>Period | % of<br>Oesophageal<br>Carcinomas<br>that Are NECs | N<br>Oesophageal<br>NECs<br>(Me:W) | Predisposing<br>Factors                                                                | Age<br>Year<br>(Range)                | Size cm<br>(Range)           | Location<br>of Primary<br>Tumour<br>(U:M:L) | Symptoms<br>(n Dysphagia/<br>Weight Loss/<br>Pain/Other)           | Symptom<br>Duration<br>Mo<br>(Range)               | n LD:<br>n ED | n<br>Lymph.<br>Met. | n Distant<br>Met. at<br>Presentation/<br>Study Start<br>(Sites) | n SC:<br>n LC | n + Other<br>Histological<br>Components                                                                | Overall<br>Survival<br>Mo<br>(Range)                        | n Survivors<br>>2 Years:<br>Time to<br>Death or End<br>of Follow-Up |
|-------------------------------------|----------------|----------------------------------------------------|------------------------------------|----------------------------------------------------------------------------------------|---------------------------------------|------------------------------|---------------------------------------------|--------------------------------------------------------------------|----------------------------------------------------|---------------|---------------------|-----------------------------------------------------------------|---------------|--------------------------------------------------------------------------------------------------------|-------------------------------------------------------------|---------------------------------------------------------------------|
| Li A.F.Y.<br>[16] (2010,<br>Taiwan) | 1989–<br>2008  | NA                                                 | 17 (16:1)                          | NA                                                                                     | M <sup>1</sup> :<br>61.8 ±<br>14.2 SD | NA                           | NA                                          | NA                                                                 | NA                                                 | 9:7           | NA                  | NA                                                              | 17 y:0        | NA                                                                                                     | M <sup>2</sup> : 15 ±<br>4.46                               | NA                                                                  |
| Li A.F.Y.<br>[34] (2010,<br>Taiwan) | 1989–<br>2009  | NA                                                 | 11 (10:1)                          | NA                                                                                     | M <sup>1</sup> :<br>61 ± 13           | NA                           | NA                                          | NA                                                                 | NA                                                 | 7:4           | NA                  | 4 (NA)                                                          | 11 y:0        | 4 + squamous<br>cell carcinoma                                                                         | M <sup>2</sup> : 27.7 ±<br>14.8                             | NA                                                                  |
| Lu J [175]<br>(2010, China)         | 1990–<br>2004  | 4.8 <sup>b</sup>                                   | 15 (11:4)                          | 11: smokers +<br>drinkers <sup>j</sup> , 6:<br>hot food and<br>quick food <sup>f</sup> | M <sup>1</sup> :<br>58.8<br>(40–81)   | NA                           | 3:10:2                                      | 15/0/5/0                                                           | M <sup>1</sup> :<br>75 days<br>(15 days–<br>10 mo) | NA            | 3                   | 0                                                               | 15 y:0        | 6 + squamous<br>dysplasia/<br>carcinoma<br>insitu, 2 + well<br>differentiated<br>squamous<br>carcinoma | M <sup>2</sup> : 19,<br>M <sup>1</sup> : 23.7<br>(4–108 mo) | 1: 108 mo (S)                                                       |
| Tanaka T<br>[161] (2010,<br>Japan)  | 1986–<br>2007  | 0.9                                                | 7 (5:2)                            | NA                                                                                     | (61–72)                               | (3–8)                        | 1:4:2                                       | NA                                                                 | NA                                                 | 4:3           | 7                   | 3 (3/7 lymph<br>mets; cervical<br>or celiac)                    | 7 y:0         | NA                                                                                                     | M <sup>2</sup> : 16<br>(12–93)                              | 2: 45, 93 mo<br>(S+ C)                                              |
| Chen BS<br>[135] (2011,<br>China)   | 1990–<br>2009  | 1.0                                                | 42 <sup>d</sup> (26:14)            | NA                                                                                     | M <sup>1</sup> : 57<br>(39–77)        | M <sup>2</sup> : 5<br>(2–12) | 1:32:7                                      | Dysphagia,<br>weight loss,<br>retrosternal<br>pain<br>(numbers NA) | NA                                                 | 40:0          | 27                  | 0                                                               | 40 y:0        | NA                                                                                                     | M <sup>2</sup> : 13.0                                       | NA                                                                  |

Table S5. Cont.

| Author<br>(Year,<br>Country)                                                  | Time<br>Period | % of<br>Oesophageal<br>Carcinomas<br>that Are NECs | N<br>Oesophageal<br>NECs<br>(Me:W) | Predisposing<br>Factors                                      | Age<br>Year<br>(Range)         | Size cm<br>(Range)                          | Location<br>of Primary<br>Tumour<br>(U:M:L) | Symptoms<br>(n Dysphagia/<br>Weight Loss/<br>Pain/Other) | Symptom<br>Duration<br>Mo<br>(Range) | n LD:<br>n ED      | n<br>Lymph.<br>Met. | n Distant<br>Met. at<br>Presentation/<br>Study Start<br>(Sites)                       | n SC:<br>n LC      | n + Other<br>Histological<br>Components | Overall<br>Survival<br>Mo<br>(Range)                                     | n Survivors<br>>2 Years:<br>Time to<br>Death or End<br>of Follow-Up |
|-------------------------------------------------------------------------------|----------------|----------------------------------------------------|------------------------------------|--------------------------------------------------------------|--------------------------------|---------------------------------------------|---------------------------------------------|----------------------------------------------------------|--------------------------------------|--------------------|---------------------|---------------------------------------------------------------------------------------|--------------------|-----------------------------------------|--------------------------------------------------------------------------|---------------------------------------------------------------------|
| Grossman<br>R.A. [11]<br>(2011, USA)                                          | 1973–<br>2006  | NA                                                 | 274 (NA)                           | NA                                                           | NA                             | NA                                          | NA                                          | NA                                                       | NA                                   | NA                 | NA                  | NA                                                                                    | 247 <sup>y:0</sup> | NA                                      | NA                                                                       | NA                                                                  |
| Vos B [173]<br>(2011,<br>Belgium, the<br>Netherlands,<br>USA,<br>Switzerland) | 1994–<br>2004  | NA                                                 | 24 (16:8)                          | 90%:<br>smokers <sup>k</sup> ,<br>70%: drinkers <sup>l</sup> | M <sup>2</sup> : 65<br>(59–69) | >5 in<br>56% of<br>cases<br>(2–8)<br>(5 NA) | 3:12:8<br>(1 NA)                            | 19/13/11/0                                               | NA                                   | 11:13 <sup>f</sup> | NA                  | 11 (6 liver,<br>5 distant<br>lymph, 2 lung,<br>1 brain, 1 bone,<br>1 thyroid)<br>2 NA | 24 <sup>y:0</sup>  | 2 + squamous<br>differentiation         | M <sup>2</sup> : 11<br>(8–20)                                            | 4: >2 years<br>(1: S+C,<br>1: S+C+R,<br>2: NA)                      |
| Nakajima Y<br>[154] (2012,<br>Japan)                                          | 1996–<br>2006  | 0.9                                                | 18 (13:5)                          | NA                                                           | M <sup>2</sup> : 67<br>(40–70) | NA                                          | 4:6:8                                       | NA                                                       | NA                                   | 10:8               | 14                  | 9                                                                                     | 18 <sup>y:0</sup>  | NA                                      | M <sup>2</sup> : 16.1                                                    | 3: 48, 54.2,<br>76.5 mo<br>(C+R)                                    |
| Terashima T.<br>[115] (2012,<br>Japan)                                        | 2000–<br>2008  | NA                                                 | 8 (NA)                             | NA                                                           | NA                             | NA                                          | NA                                          | NA                                                       | NA                                   | 0:8 <sup>y</sup>   | NA                  | 8 <sup>y</sup>                                                                        | 8 <sup>y:0</sup>   | NA                                      | NA<br>(oesophagus<br>+<br>gallbladder:<br>M <sup>2</sup> : 14.9)         | NA                                                                  |
| Ding J [137]<br>(2013, China)                                                 | 1998–<br>2007  | 0.8                                                | 212 <sup>d</sup> (66:40)           | NA                                                           | M <sup>2</sup> : 58<br>(45–77) | NA                                          | NA                                          | NA                                                       | NA                                   | 106:0 <sup>1</sup> | NA                  | 0                                                                                     | 106 <sup>y:0</sup> | NA                                      | S + C or<br>R + C = M <sup>2</sup> :<br>22 S or<br>R = M <sup>2</sup> 11 | NA                                                                  |



Table S5. Cont.

| Author<br>(Year,<br>Country)       | Time<br>Period         | % of<br>Oesophageal<br>Carcinomas<br>that Are NECs | N<br>Oesophageal<br>NECs<br>(Me:W) | Predisposing<br>Factors | Age<br>Year<br>(Range)         | Size cm<br>(Range)          | Location<br>of Primary<br>Tumour<br>(U:M:L) | Symptoms<br>(n Dysphagia/<br>Weight Loss/<br>Pain/Other) | Symptom<br>Duration<br>Mo<br>(Range)      | n LD:<br>n ED            | n<br>Lymph.<br>Met. | n Distant<br>Met. at<br>Presentation/<br>Study Start<br>(Sites) | n SC:<br>n LC                      | n + Other<br>Histological<br>Components                                                                           | Overall<br>Survival<br>Mo<br>(Range) | n Survivors<br>>2 Years:<br>Time to<br>Death or End<br>of Follow-Up |
|------------------------------------|------------------------|----------------------------------------------------|------------------------------------|-------------------------|--------------------------------|-----------------------------|---------------------------------------------|----------------------------------------------------------|-------------------------------------------|--------------------------|---------------------|-----------------------------------------------------------------|------------------------------------|-------------------------------------------------------------------------------------------------------------------|--------------------------------------|---------------------------------------------------------------------|
| Kukar M.<br>[144] (2013,<br>USA)   | 1973–<br>2009          | 0.6%                                               | 387<br>(230:157)                   | NA                      | M <sup>1</sup> :<br>68.2       | NA                          | NA                                          | NA                                                       | NA                                        | NA                       | NA                  | 191:<br>distant spread                                          | 387 <sup>y</sup> :0                | NA                                                                                                                | M <sup>2</sup> : 11                  | NA                                                                  |
| Lu X.-J<br>[147] (2013,<br>China)  | NA                     | Mean: 1.26<br>(0.4–2.8)                            | 1176<br>(830:346)                  | NA                      | M <sup>2</sup> : 57<br>(25–87) | Average:<br>5.4<br>(0.5–17) | 121:731:324                                 | 78.8%–100%/<br>NA nr/22.8–<br>15.6%/NA nr<br>hoarseness  | M <sup>1</sup> : 1<br>(10 days–<br>20 mo) | 347:<br>120 <sup>u</sup> | NA                  | 99 <sup>x</sup> (NA)                                            | 735 <sup>y</sup> :0<br>(441<br>NA) | 123 +<br>squamous cell<br>carcinoma,<br>12 +<br>adenocarcinoma,<br>3 +<br>adenosquamous<br>carcinoma <sup>z</sup> | M <sup>2</sup> : 11.1<br>(10–15)     | NA                                                                  |
| Lu Z.H. [87]<br>(2013, China)      | 2009–<br>2011          | NA                                                 | 5 (NA)                             | NA                      | NA                             | NA                          | NA                                          | NA                                                       | NA                                        | NA                       | NA                  | NA                                                              | NA                                 | NA                                                                                                                | NA                                   | NA                                                                  |
| Meng MB<br>[151] (2013,<br>China)  | 1991–<br>2009          | NA                                                 | 14 (12:2)                          | NA                      | (50–70)                        | (2–12)                      | 4:10:0                                      | NA                                                       | NA                                        | 14:0                     | 3                   | 1 (histologic)                                                  | 14 <sup>y</sup> :0                 | NA                                                                                                                | M <sup>2</sup> :<br>(2–26.3)         | 1: 26.3 mo<br>(S+C)                                                 |
| Terada T<br>[163] (2013,<br>Japan) | 20-<br>years<br>period | 0.25                                               | 6 (6:0)                            | NA                      | M <sup>1</sup> : 73<br>(62–81) | NA                          | 0:2:4                                       | 5/0/0/<br>1 vomiting                                     | NA                                        | NA                       | NA                  | NA                                                              | 6 <sup>y</sup> :0                  | 1 +<br>squamous cell<br>carcinoma and<br>adenocarcinoma                                                           | M <sup>1</sup> : 13<br>(2–25)        | NA                                                                  |

Table S5. Cont.

| Author<br>(Year,<br>Country)                       | Time<br>Period | % of<br>Oesophageal<br>Carcinomas<br>that Are NECs | N<br>Oesophageal<br>NECs<br>(Me:W) | Predisposing<br>Factors                                                                                               | Age<br>Year<br>(Range)                 | Size cm<br>(Range)                  | Location<br>of Primary<br>Tumour<br>(U:M:L) | Symptoms<br>(n Dysphagia/<br>Weight Loss/<br>Pain/Other) | Symptom<br>Duration<br>Mo<br>(Range) | n LD:<br>n ED           | n<br>Lymph.<br>Met. | n Distant<br>Met. at<br>Presentation/<br>Study Start<br>(Sites)                           | n SC:<br>n LC | n + Other<br>Histological<br>Components                                 | Overall<br>Survival<br>Mo<br>(Range)                                                  | n Survivors<br>>2 Years:<br>Time to<br>Death or End<br>of Follow-Up |
|----------------------------------------------------|----------------|----------------------------------------------------|------------------------------------|-----------------------------------------------------------------------------------------------------------------------|----------------------------------------|-------------------------------------|---------------------------------------------|----------------------------------------------------------|--------------------------------------|-------------------------|---------------------|-------------------------------------------------------------------------------------------|---------------|-------------------------------------------------------------------------|---------------------------------------------------------------------------------------|---------------------------------------------------------------------|
| Sorbye H.<br>[4] (2013,<br>12 Nordic<br>hospitals) | 2000–<br>2009  | NA                                                 | 12 (NA)                            | NA                                                                                                                    | NA                                     | NA                                  | NA                                          | NA                                                       | NA                                   | NA                      | NA                  | NA                                                                                        | 75%:<br>NA    | NA                                                                      | M <sup>2</sup> : 14<br>(CI 95%:<br>2.3–25.7)                                          | NA                                                                  |
| Wang SY<br>[164] (2013,<br>China)                  | 2001–<br>2011  | 1.3                                                | 76 (60:16)                         | 39: tobacco +<br>alcohol abuse <sup>f</sup> ,<br>12: tobacco<br>abuse <sup>f</sup> , 4:<br>alcohol abuse <sup>f</sup> | M <sup>2</sup> : 61<br>(41–84)         | >5 cm:<br>32,<br>≤5 cm:<br>44       | 16:46:14                                    | 57/36/25/<br>2 bleeding,<br>2 cerchnus,<br>1 other       | NA                                   | 60:16                   | 44                  | 17 (6 liver,<br>7 distant lymph<br>nodes, 3 lung,<br>3 bone,<br>1 pancreas,<br>1 stomach) | 76 %:0        | 14 + squamous<br>differentiation,<br>1 + sarcomatoid<br>differentiation | M <sup>2</sup> : 15.77<br>(95% CI:<br>11.0–15.77)                                     | 4: >5 years<br>(2: S+C,<br>2: C+R)                                  |
| Yan H. [97]<br>(2013, China)                       | 1992–<br>2012  | NA                                                 | 82 (53:29)                         | NA                                                                                                                    | 44 ≤<br>60 years,<br>37 ><br>60 years  | 48 ≤<br>5 cm, 34<br>> 5 cm          | 29:37:16                                    | NA                                                       | NA                                   | NA                      | 46                  | 31                                                                                        | 82 %:0        | NA                                                                      | M <sup>2</sup> : Me: 12,<br>W: 14                                                     | NA                                                                  |
| Chen W.W.<br>[177] (2014,<br>China)                | 1998–<br>2012  | NA                                                 | 211 (164:47)                       | NA                                                                                                                    | 154 <<br>60 years,<br>57 ≥<br>60 years | 73 <<br>5 cm,<br>124 ≥<br>5 cm      | 31:124:56                                   | NA                                                       | NA                                   | 148:<br>63 <sup>v</sup> | 145                 | 60                                                                                        | 211 %:0       | NA                                                                      | M <sup>2</sup> : 13 mo                                                                | NA                                                                  |
| Chen W.W.<br>[186] (2014,<br>China)                | 1994–<br>2012  | 1.7%                                               | 44 (33:11)                         | NA                                                                                                                    | 15 ><br>60 years,<br>29 ≤<br>60 years  | 21/39 <<br>5 cm,<br>18/39 ≥<br>5 cm | 7:22:15                                     | NA                                                       | NA                                   | NA                      | 26                  | 10                                                                                        | 44 %:0        | NA                                                                      | High level<br>Lgr5:<br>M <sup>2</sup> : 7 mo,<br>Low level:<br>M <sup>2</sup> : 18 mo | 18: >2 years                                                        |

Table S5. Cont.

| Author<br>(Year,<br>Country)           | Time<br>Period   | % of<br>Oesophageal<br>Carcinomas<br>that Are NECs | N<br>Oesophageal<br>NECs<br>(Me:W) | Predisposing<br>Factors                                                                                                     | Age<br>Year<br>(Range)              | Size cm<br>(Range)           | Location<br>of Primary<br>Tumour<br>(U:M:L) | Symptoms<br>(n Dysphagia/<br>Weight Loss/<br>Pain/Other)                       | Symptom<br>Duration<br>Mo<br>(Range) | n LD:<br>n ED | n<br>Lymph.<br>Met. | n Distant<br>Met. at<br>Presentation/<br>Study Start<br>(Sites)                                     | n SC:<br>n LC | n + Other<br>Histological<br>Components                          | Overall<br>Survival<br>Mo<br>(Range) | n Survivors<br>>2 Years:<br>Time to<br>Death or End<br>of Follow-Up |
|----------------------------------------|------------------|----------------------------------------------------|------------------------------------|-----------------------------------------------------------------------------------------------------------------------------|-------------------------------------|------------------------------|---------------------------------------------|--------------------------------------------------------------------------------|--------------------------------------|---------------|---------------------|-----------------------------------------------------------------------------------------------------|---------------|------------------------------------------------------------------|--------------------------------------|---------------------------------------------------------------------|
| Okuma H.S.<br>[182] (2014,<br>Japan)   | 2000–<br>2013    | NA                                                 | 12 (8:4)                           | NA                                                                                                                          | M <sup>2</sup> : 62<br>(39–72)      | NA                           | NA                                          | NA                                                                             | NA                                   | 0:12          | NA                  | 12 ( 9 liver,<br>6 lymph,<br>1 lung,<br>1 bone,<br>1 bone marrow,<br>1 stomach,<br>1 crural muscle) | NA            | NA                                                               | M <sup>2</sup> : 12.6<br>(1.1–46.2)  | 3: 28.6,<br>32, 46)                                                 |
| Olsen I.H.<br>[124] (2014,<br>Denmark) | 3-year<br>period | NA                                                 | 8 (NA)                             | NA                                                                                                                          | NA                                  | NA                           | NA                                          | NA                                                                             | NA                                   | NA            | NA                  | 8                                                                                                   | NA            | NA                                                               | NA                                   | NA                                                                  |
| Yamaguchi T.<br>[92] (2014,<br>Japan)  | 2000–<br>2011    | NA                                                 | 85 ° (NA)                          | NA                                                                                                                          | NA                                  | NA                           | NA                                          | NA                                                                             | NA                                   | NA            | NA                  | NA                                                                                                  | NA            | NA °                                                             | M <sup>2</sup> : 13.4                | NA                                                                  |
| Zhang Z.<br>[168] (2014,<br>China)     | 2007–<br>2012    | NA                                                 | 38 (31:7)                          | NA                                                                                                                          | M <sup>2</sup> :<br>61.3<br>(42–76) | NA                           | 4:23:11                                     | NA                                                                             | NA                                   | NA            | NA                  | NA                                                                                                  | 38 %:0        | NA                                                               | NA                                   | NA                                                                  |
| Zhu Y. [176]<br>(2014, China)          | 1990–<br>2011    | 0.94%                                              | 64 (46:18)                         | 35: smoking<br>index >400 <sup>f</sup> ,<br>27: risky diets<br>(heavy<br>drinking,<br>hot food,<br>bulky food) <sup>f</sup> | M <sup>2</sup> : 58<br>(43–76)      | M <sup>2</sup> : 5<br>(1–12) | 9:35:16<br>(4 mixed)                        | 52/0/NA nr/<br>NA nr<br>hoarsness,<br>abdominal<br>distension,<br>cervial mass | NA                                   | 46:18         | 49                  | 18<br>(5: liver mets,<br>2: lung,<br>1: bone,<br>1: thyrid)                                         | 64 %:0        | 6 + squamous<br>cell carcinoma,<br>2 + cardiac<br>adenocarcinoma | M <sup>2</sup> : 12.6                | 4: >4 years<br>(1: S, 1: S+C,<br>1: R+C,<br>1: R+S+C)               |



Table S5. Cont.

| Author<br>(Year,<br>Country) | Time<br>Period  | % of<br>Oesophageal<br>Carcinomas<br>that Are NECs | N<br>Oesophageal<br>NECs<br>(Me:W)                                     | Predisposing<br>Factors                                                         | Age<br>Year<br>(Range) | Size cm<br>(Range) | Location<br>of Primary<br>Tumour<br>(U:M:L)    | Symptoms<br>(n Dysphagia/<br>Weight Loss/<br>Pain/Other)                                            | Symptom<br>Duration<br>Mo<br>(Range) | n LD:<br>n ED | n<br>Lymph.<br>Met. | n Distant<br>Met. at<br>Presentation/<br>Study Start<br>(Sites)                                                                                                   | n + Other<br>Histological<br>Components                                                                                  | Overall<br>Survival<br>Mo<br>(Range) | n Survivors<br>>2 Years:<br>Time to<br>Death or End<br>of Follow-Up |
|------------------------------|-----------------|----------------------------------------------------|------------------------------------------------------------------------|---------------------------------------------------------------------------------|------------------------|--------------------|------------------------------------------------|-----------------------------------------------------------------------------------------------------|--------------------------------------|---------------|---------------------|-------------------------------------------------------------------------------------------------------------------------------------------------------------------|--------------------------------------------------------------------------------------------------------------------------|--------------------------------------|---------------------------------------------------------------------|
| TOTAL                        | (1947–<br>2011) | Average:<br>1.6 <sup>c</sup>                       | 3806 <sup>c</sup> (Me:<br>1897/2704<br>(70%),<br>W: 807/2704<br>(30%)) | At least 196<br>smokers or<br>drinkers or<br>both of<br>254 observed<br>(77.2%) | (25–89)                | (0.2–17)           | 250:1240:<br>636 (of<br>2126 <sup>c, m</sup> ) | 411/119/111 <sup>o</sup><br>44 (Of 680<br>symptoms<br>observed in<br>525 patients <sup>c, n</sup> ) | (0–20)                               |               |                     | 66 (36%)<br>liver,<br>57 (31.3%)<br>distal lymph<br>nodes, 20<br>(11%) lung,<br>16 (8.8%)<br>bone, 3 (1.6%)<br>brain,<br>18 (9.9%)<br>other (of 182<br>mentioned) | 225 +<br>squamous<br>(81.5%), 40 +<br>adeno/muco/<br>glandular<br>(14.5%),<br>11 + other<br>(4.0%) (of 276<br>mentioned) |                                      | 81/2080<br>(3.9%) <sup>c</sup>                                      |

<sup>a</sup> includes oesophageal and proximal gastric cancer; <sup>b</sup> includes only superficial carcinomas of the oesophagus; <sup>c</sup> possible overlapping cohorts with lowest patient number not included. NA not included; <sup>d</sup> lower number of patients included in the study/with complete records, as reflected in the total of (M:W); <sup>e</sup> original cohort of 258 included 21 MANECs, distribution between organ sites is not known; <sup>f</sup> no further specification; <sup>g</sup> excess of 80 g alcohol per day; <sup>h</sup> ≥1 pack of cigarettes/day for >2 years; <sup>i</sup> >2 pints of beer (or the equivalent)/day for >2 years; <sup>j</sup> moderate to severe degree for >10 years; <sup>k</sup> mean of 40 pack-years (range: 20–50); <sup>l</sup> mean of 3 drinks/day (range 2–5); <sup>m</sup> other categorization not included; <sup>n</sup> only precise numbers; <sup>o</sup> includes reflux; <sup>p</sup> LD includes mediastinal lymph node involvement; <sup>q</sup> LD encompasses stages I–III and no metastases; <sup>r</sup> ED includes intra-abdominal lymph nodes in patients with mid-third oesophageal tumours; <sup>s</sup> ED is the equivalent to AJCC stage IVB; <sup>t</sup> LD: visible tumour within a radiation field, ED: visible tumour exceeded beyond LD; <sup>u</sup> Of 467 cases studied; <sup>v</sup> VALSG (no further information); <sup>w</sup> Unknown if any of the lymph metastases are distant; <sup>x</sup> Of 523 studied; <sup>y</sup> part of inclusion criteria; <sup>z</sup> Of 735 analyzed; <sup>aa</sup> Includes patients alive without recurrence, alive with recurrence and those who have died of the disease/other disease 2 years after diagnosis/treatment start; <sup>ab</sup> Numbers may not be exact; extrapolated from incidence rates <sup>ac</sup> Prospective study, all others retrospective or NA; NA: Not Available; NECs: includes small cell/large cell carcinomas, WHO 2010/WHO 2000 definition of gastroenteropancreatic neuroendocrine carcinoma/poorly differentiated endocrine carcinoma/ G3 tumours; Me: Men; W: Women; M<sup>1</sup>: Mean; M<sup>2</sup>: Median; Year: years/years-of-age; U: Upper oesophagus; M: Middle oesophagus; L: Lower oesophagus; SAIDH: Syndrome of inappropriate antidiuretic hormone; Mo: months; LD: tumour confined to a localized anatomic region (the oesophagus/perioesophageal tissue/adjacent organs) with/without locoregional lymph nodes metastases (encompassable within a tolerable radiation therapy treatment portal), ED: outside LD; SC: Small cell, LC: Large cell; Met.: Metastases; CI: Confidence interval; C: Chemotherapy; S: Surgery; R: Radiotherapy.

**Table S6.** Overview of Studies Including Gastric Neuroendocrine Carcinomas.

| Author<br>(Year,<br>Country)       | Time<br>Period  | % of NECs<br>in Relation<br>to Gastric<br>Cancers | n Gastric<br>NEC<br>(M:W) | Age (Range)                         | Size cm<br>(Range)                | Location in<br>Primary                                                            | n Patients with<br>Lymph. Met.                                    | n Patients with<br>Distant Mets. at<br>Presentation (Sites) | n SC:<br>n LC                     | Other Histological<br>Components                                              | Overall Survival<br>Mo (Range)                                          | Long-Term Survivors<br>(>2 Years) (DOD, AWD,<br>NED) n: Time until<br>Death/End of Follow-Up Mo |                       |
|------------------------------------|-----------------|---------------------------------------------------|---------------------------|-------------------------------------|-----------------------------------|-----------------------------------------------------------------------------------|-------------------------------------------------------------------|-------------------------------------------------------------|-----------------------------------|-------------------------------------------------------------------------------|-------------------------------------------------------------------------|-------------------------------------------------------------------------------------------------|-----------------------|
| Rindi G.<br>[197] (1993,<br>Italy) | 1970–<br>NA     | NA                                                | 9.00                      | M <sup>1</sup> : 61.3 ±<br>10 years | M <sup>2</sup> : 3.5<br>(1.5–7)   | 2 antrum.<br>2 body-fundus,<br>5 NA                                               | NA (4 local lymph,<br>3 local + distant<br>sites, 2 distant only) | 5                                                           | 6                                 | NA                                                                            | M <sup>1</sup> : 6.5 (1–12)                                             | 0                                                                                               |                       |
| Rindi G.<br>[198] (1996,<br>Italy) | 1970–<br>NA     | NA                                                | 12.00                     | M <sup>1</sup> : 63<br>(41–76)      | M <sup>1</sup> : 4.2<br>(1.5–7)   | 10 body/fundus,<br>2 antrum                                                       | 6 local lymph,<br>3 local + distant,<br>3 distant sites           | 6                                                           | NA                                | 3: 2+ well<br>differentiated<br>argyrophil, 1 poorly +<br>well differentiated | M <sup>1</sup> : 6.6 (1–12)                                             | 3: 72 mo M <sup>1</sup> follow-up<br>(13–168)                                                   |                       |
| Matsui K<br>[194] (1998,<br>Japan) | 1987–<br>1996   | 1.22 <sup>a</sup>                                 | 33 (23:10)                | M <sup>2</sup> : 60<br>(44–92)      | M <sup>2</sup> : 6.0<br>(2–14)    | 15 cardia: 8 M:<br>10 antrum                                                      |                                                                   | 32                                                          | 8 (8 liver, unknown<br>if others) | 12:21                                                                         | 19 + adenocarcinoma,<br>2 + squamous<br>component and<br>adenocarcinoma | M <sup>1</sup> : 14.9 <sup>b</sup>                                                              | 1: >4 years           |
| Kimura H<br>[205] (1999,<br>Japan) | 1973–<br>1997   | 0.23 <sup>c</sup>                                 | 8 (7:1)                   | M <sup>1</sup> : 62.6<br>(44–73)    | M <sup>1</sup> : 7.9<br>(4–12)    | 1: M, 3: antrum,<br>2: cardia + M,<br>1: antrum + M,<br>2: M + cardia<br>+ antrum |                                                                   | 8                                                           | 3 (sites NA)                      | 8: 0                                                                          | NA                                                                      | Estimated M <sup>2</sup> :<br>252 days<br>(45–1520 days)                                        | 1: 43                 |
| Kimura H.<br>[14] (1999,<br>Japan) | 1981–<br>1994   | NA                                                | 8 (NA)                    | (44–73)                             | (4–12)                            | NA                                                                                |                                                                   | 8                                                           | 3 (sites NA)                      | 8 <sup>d</sup> :0                                                             | NA                                                                      | M <sup>2</sup> : 253 days<br>(45–822 days)                                                      | 2: 747 days, 822 days |
| Rindi G. [63]<br>(1999, Italy)     | NA <sup>e</sup> | NA                                                | 16 (13:3)                 | NA                                  | M <sup>2</sup> : 4.25<br>(3–5.55) | 0 U: 9 M :<br>7 antrum                                                            |                                                                   | 15                                                          | 8                                 | NA                                                                            | NA                                                                      | M <sup>2</sup> : 8                                                                              | NA                    |

Table S6. Cont.

| Author<br>(Year,<br>Country)                    | Time<br>Period | % of NECs<br>in Relation<br>to Gastric<br>Cancers | n Gastric<br>NEC<br>(M:W)  | Age (Range)                    | Size cm<br>(Range)                     | Location in<br>Primary         | n Patients with<br>Lymph. Met. | n Patients with<br>Distant Mets. at<br>Presentation (Sites) | n SC:<br>n LC     | Other Histological<br>Components | Overall Survival<br>Mo (Range)             | Long-Term Survivors<br>(>2 Years) (DOD, AWD,<br>NED) n: Time until<br>Death/End of Follow-Up Mo |
|-------------------------------------------------|----------------|---------------------------------------------------|----------------------------|--------------------------------|----------------------------------------|--------------------------------|--------------------------------|-------------------------------------------------------------|-------------------|----------------------------------|--------------------------------------------|-------------------------------------------------------------------------------------------------|
| Kim K.M.<br>[62] (2002,<br>Korea)               | NA             | NA                                                | 6 (5:1)                    | (61–81)                        | (2.5–<br>10.2)                         | 5: antrum, 1:<br>body + antrum | NA                             | 1 (NA others)                                               | 0: 6              | 6 + adenocarcinoma               | NA                                         | NA                                                                                              |
| Nishikura K<br>[196] (2003,<br>Japan)           | 1980–<br>2000  | NA                                                | 68 <sup>f</sup><br>(54:14) | Average:<br>66.5 <sup>f</sup>  | NA                                     | NA                             | NA                             | NA                                                          | NA                | 48 + adenocarcinoma <sup>f</sup> | NA                                         | NA                                                                                              |
| Pizzi S. [38]<br>(2003, Italy)                  | NA             | NA                                                | 15 (13:2)                  | (40–91)                        | NA                                     | NA                             | 10, 2 NA                       | 5 (3 liver,<br>3 peritoneum,<br>1 bone) <sup>g</sup>        | NA                | NA                               | NA                                         | NA                                                                                              |
| Brenner B.<br>[7] (2004,<br>USA)                | 1980–<br>2002  | NA                                                | 5 (NA)                     | NA                             | NA                                     | NA                             | NA                             | NA                                                          | 5 <sup>d</sup> :0 | NA                               | NA                                         | NA                                                                                              |
| Furlan D.<br>[39] (2004,<br>Italy)              | NA             | NA                                                | 6 (6:0)                    | (37–72)                        | (1.2–14)                               | NA                             | 5                              | 1 (liver), (1 NA) <sup>g</sup>                              | NA                | NA                               | Average: 15.7<br>(5–48)                    | 1: 48                                                                                           |
| La Rosa S.<br>[58] (2004,<br>Italy)             | NA             | NA                                                | 7 (7:0)                    | M <sup>1</sup> : 56<br>(38–74) | M <sup>1</sup> : 7.6<br>(1.2–14)       | NA                             | NA                             | 7                                                           | NA                | NA                               | NA                                         | NA                                                                                              |
| Borch K<br>[188] (2005,<br>Sweden) <sup>m</sup> | 1994–<br>1999  | NA                                                | 9 (7:2)                    | M <sup>2</sup> : 72<br>(20–80) | M <sup>2</sup> : 4.3<br>(1.5–<br>10.0) | NA                             | NA                             | 7 (7 liver)                                                 | NA                | NA                               | 5 years<br>survival: 33.3%<br>(2.5%–64.1%) | 33.3% alive at 5 years                                                                          |

Table S6. Cont.

| Author<br>(Year,<br>Country)         | Time<br>Period | % of NECs<br>in Relation<br>to Gastric<br>Cancers | n Gastric<br>NEC<br>(M:W) | Age (Range)                      | Size cm<br>(Range)                     | Location in<br>Primary | n Patients with<br>Lymph. Met. | n Patients with<br>Distant Mets. at<br>Presentation (Sites) | n SC:<br>n LC                                  | Other Histological<br>Components | Overall Survival<br>Mo (Range) | Long-Term Survivors<br>(>2 Years) (DOD, AWD,<br>NED) n: Time until<br>Death/End of Follow-Up Mo |
|--------------------------------------|----------------|---------------------------------------------------|---------------------------|----------------------------------|----------------------------------------|------------------------|--------------------------------|-------------------------------------------------------------|------------------------------------------------|----------------------------------|--------------------------------|-------------------------------------------------------------------------------------------------|
| Furlan D.<br>[43] (2005,<br>Italy)   | NA             | NA                                                | 7 (6:1)                   | (37–72)                          | (1.2–14)                               | NA                     | 6 (1 NA)                       | 1 (liver) (1 NA) §                                          | 6<br>intermediate,<br>1 large/<br>intermediate | NA                               | (5–48)                         | 1: 48                                                                                           |
| Pizzi S. [55]<br>(2005, Italy)       | NA             | NA                                                | 8 (7:1)                   | (44–83)                          | (0.4–10)                               | NA                     | 5 (1 NA)                       | 3 (3 liver,<br>2 peritoneum) (1 NA) §                       | NA                                             | NA                               | NA                             | NA                                                                                              |
| Ishikubo T.<br>[54] (2006,<br>Japan) | NA             | NA                                                | 16 (13:3)                 | (51–79)                          | NA                                     | NA                     | NA                             | NA                                                          | NA                                             | NA                               | NA                             | NA                                                                                              |
| Jiang SX.<br>[191] (2006,<br>Japan)  | 1980–<br>2004  | 1.48 <sup>b</sup>                                 | 42 (34:8)                 | M <sup>1</sup> : 62.7<br>(47–79) | M <sup>1</sup> : 6.4<br>(1.1–<br>13.0) | 15 U: 11 M:<br>16 L    | 30 (1 NA)                      | 3 (3 liver)                                                 | 0: 42 <sup>d</sup><br>(inclusion)              | NA                               | 5 years<br>survival: 31.1%     | NA                                                                                              |
| Kim K.O.<br>[13] (2006,<br>Korea)    | 1998–<br>2005  | NA                                                | 5 (NA)                    | NA                               | NA                                     | NA                     | NA                             | NA                                                          | 5 <sup>d</sup> :0                              | NA                               | NA                             | NA                                                                                              |
| Li A.F.Y. [42]<br>(2006,<br>Taiwan)  | 1985–<br>2004  | NA                                                | 9 (8:1)                   | (34–88)                          | NA                                     | NA                     | 7                              | 2                                                           | NA                                             | NA                               | (4–91), 1 NA                   | 3: 91, 65, 25                                                                                   |
| Uccella S.<br>[37] (2006,<br>Italy)  | 1982–<br>2004  | NA                                                | 11 (10:1)                 | (41–72)                          | (3–14)                                 | NA                     | NA                             | NA                                                          | NA                                             | NA                               | NA                             | NA                                                                                              |

Table S6. Cont.

| Author<br>(Year,<br>Country)          | Time<br>Period | % of NECs<br>in Relation<br>to Gastric<br>Cancers | n Gastric<br>NEC<br>(M:W)                                            | Age (Range)                                      | Size cm<br>(Range)                                               | Location in<br>Primary | n Patients with<br>Lymph. Met. | n Patients with<br>Distant Mets. at<br>Presentation (Sites) | n SC:<br>n LC       | Other Histological<br>Components | Overall Survival<br>Mo (Range)     | Long-Term Survivors<br>(>2 Years) (DOD, AWD,<br>NED) n: Time until<br>Death/End of Follow-Up Mo |
|---------------------------------------|----------------|---------------------------------------------------|----------------------------------------------------------------------|--------------------------------------------------|------------------------------------------------------------------|------------------------|--------------------------------|-------------------------------------------------------------|---------------------|----------------------------------|------------------------------------|-------------------------------------------------------------------------------------------------|
| Boo YJ [187]<br>(2007, Korea)         | 1993–<br>2000  | NA                                                | 12 (10:2)                                                            | Average:<br>SC: 63.6<br>(±8), LC<br>(64.8 (±11)) | M <sup>1</sup> :<br>SC: 4.28<br>(±3.36),<br>LC: 6.00<br>(± 4.06) | 2 U: 2 M: 8 L          | NA                             | 5                                                           | 7:5                 | NA                               | 15 (CI 95%<br>1.2–28.8)            | NA                                                                                              |
| Lee H. [70]<br>(2007, Korea)          | 1996–<br>2005  | NA                                                | 9 (NA)                                                               | NA                                               | NA                                                               | NA                     | NA                             | NA                                                          | 4:5                 | NA                               | NA                                 | NA                                                                                              |
| Lepage C. [1]<br>(2007, UK)           | 1986–<br>1999  | NA                                                | 112 (NA)                                                             | NA                                               | NA                                                               | NA                     | NA                             | NA                                                          | 112 <sup>d</sup> :0 | NA                               | Relative 1 year<br>survival: 17.6% | NA                                                                                              |
| Landry CS<br>[204] (2008,<br>USA)     | 1973–<br>2004  | NA                                                | 46 (NA)                                                              | NA                                               | NA                                                               | NA                     | NA                             | NA                                                          | NA                  | NA                               | NA                                 | NA                                                                                              |
| Shia, J. [29]<br>(2008, USA)          | NA             | NA                                                | 18 (12<br>gastric +<br>6 gastro-<br>oesophageal<br>junction)<br>(NA) | NA                                               | NA                                                               | NA                     | NA                             | NA                                                          | 7:10<br>(+1 mixed)  | NA                               | NA                                 | NA                                                                                              |
| Lepage C.<br>[79] (2009,<br>EUROCARE) | 1985–<br>1994  | NA                                                | 123                                                                  | NA                                               | NA                                                               | NA                     | NA                             | NA                                                          | 123 <sup>d</sup> :0 | NA                               | 5 years relative<br>survival: 7.7  | NA                                                                                              |

Table S6. Cont.

| Author<br>(Year,<br>Country)         | Time<br>Period | % of NECs<br>in Relation<br>to Gastric<br>Cancers | n Gastric<br>NEC<br>(M:W) | Age (Range)                       | Size cm<br>(Range)              | Location in<br>Primary | n Patients with<br>Lymph. Met. | n Patients with<br>Distant Mets. at<br>Presentation (Sites) | n SC:<br>n LC | Other Histological<br>Components                     | Overall Survival<br>Mo (Range)                      | Long-Term Survivors<br>(>2 Years) (DOD, AWD,<br>NED) n: Time until<br>Death/End of Follow-Up Mo |
|--------------------------------------|----------------|---------------------------------------------------|---------------------------|-----------------------------------|---------------------------------|------------------------|--------------------------------|-------------------------------------------------------------|---------------|------------------------------------------------------|-----------------------------------------------------|-------------------------------------------------------------------------------------------------|
| Wong Y.N.<br>[65] (2009,<br>England) | 1970–<br>2004  | NA                                                | 92 (NA)                   | NA                                | NA                              | NA                     | NA                             | NA                                                          | 92 4:0        | NA                                                   | NA                                                  | NA                                                                                              |
| Kim BS<br>[192] (2010,<br>Korea)     | 1993–<br>2008  | NA                                                | 52 (45:7)                 | M <sup>2</sup> : 62.1<br>(±11.1)  | M <sup>1</sup> : 5.44<br>(±3.7) | 14 U: 10 M:<br>28 L    | 23                             | 13                                                          | NA            | 17 + adenocarcinoma                                  | 5 years<br>survival: 41.6%                          | 41.6% alive at 5 years                                                                          |
| Li A.F.Y. [16]<br>(2010,<br>Taiwan)  | 1989–<br>2008  | NA                                                | 8 (7:1)                   | M <sup>1</sup> :68.0<br>SD: ±11.1 | NA                              | NA                     | NA                             | 3 ED                                                        | 8 4:0         | NA                                                   | M <sup>2</sup> : 15<br>(SD ± 49.97)                 | 50% alive at 2 years                                                                            |
| Li A.F.Y. [34]<br>(2010,<br>Taiwan)  | 1989–<br>2009  | NA                                                | 15 (15:0)                 | M <sup>1</sup> : 75 ± 8           | NA                              | NA                     | NA                             | 7 ED                                                        | 15 4:0        | 4 + adenocarcinoma                                   | M <sup>2</sup> : 21.3 ± 29.0<br>(M <sup>1</sup> SD) | NA                                                                                              |
| Grossman<br>R.A. [11]<br>(2011 USA)  | 1973–<br>2006  | NA                                                | 147 (NA)                  | NA                                | NA                              | NA                     | NA                             | NA                                                          | 147 4:0       | NA                                                   | NA                                                  | NA                                                                                              |
| La Rosa S<br>[61] (2011,<br>Italy)   | 1980–<br>2009  | NA                                                | 51 (NA)                   | NA                                | M <sup>2</sup> : 5.55<br>(7 NA) | NA                     | NA                             | 38 (9 NA)                                                   | 51:0          | 12 +<br>non-neuroendocrine<br>glandular/solid growth | "Rate": 75.0<br>(7 NA)                              | NA                                                                                              |
| Okita N.T<br>[206] (2011,<br>Japan)  | 2000–<br>2006  | NA                                                | 22 (19:3)                 | (27–82)                           | NA                              | NA                     | NA                             | 8                                                           | 20:2          | 4 + adenocarcinoma                                   | M <sup>2</sup> : 33                                 | 2: >3 years                                                                                     |

Table S6. Cont.

| Author<br>(Year,<br>Country)         | Time<br>Period | % of NECs<br>in Relation<br>to Gastric<br>Cancers | n Gastric<br>NEC<br>(M:W)  | Age (Range)                                 | Size cm<br>(Range)                                                 | Location in<br>Primary                                                                                                               | n Patients with<br>Lymph. Met. | n Patients with<br>Distant Mets. at<br>Presentation (Sites)   | n SC:<br>n LC | Other Histological<br>Components | Overall Survival<br>Mo (Range)          | Long-Term Survivors<br>(>2 Years) (DOD, AWD,<br>NED) n: Time until<br>Death/End of Follow-Up Mo |
|--------------------------------------|----------------|---------------------------------------------------|----------------------------|---------------------------------------------|--------------------------------------------------------------------|--------------------------------------------------------------------------------------------------------------------------------------|--------------------------------|---------------------------------------------------------------|---------------|----------------------------------|-----------------------------------------|-------------------------------------------------------------------------------------------------|
| Annenkov A<br>[64] (2012,<br>Japan)  | 1985–<br>2011  | NA                                                | 51 <sup>i</sup><br>(40:11) | Average:<br>69.6<br>(SD ± 9.8) <sup>i</sup> | M <sup>2</sup> : 4.85<br>(quartile<br>range<br>3–6.1) <sup>i</sup> | NA                                                                                                                                   | 33 <sup>i</sup>                | NA                                                            | NA            | 37 + adenocarcinoma <sup>i</sup> | NA                                      | NA                                                                                              |
| Endo S. [28]<br>(2012, Japan)        | 1998–<br>2011  | 0.25                                              | 7 (5:2)                    | (46–72)                                     | (1.7–9.8)                                                          | NA                                                                                                                                   | 5                              | 2                                                             | NA            | NA                               | Average: 50.3<br>(1–122)                | 3: 24, 62, 122                                                                                  |
| Faggiano A.<br>[68] (2012,<br>Italy) | 1990–<br>2007  | NA                                                | 7 (NA)                     | NA                                          | NA                                                                 | NA                                                                                                                                   | NA                             | NA                                                            | NA            | NA                               | NA                                      | NA                                                                                              |
| Huang J<br>[189] (2012,<br>China)    | 1990–<br>2011  | 0.16                                              | 19 (17:2)                  | M <sup>2</sup> : 61<br>(38–73)              | M <sup>1</sup> : 7.3<br>(2–15)                                     | 9: cardia, 4:<br>cardia + fundus,<br>1: corpus +<br>antrum,<br>1: corpus +<br>fundus,<br>1: cardica +<br>fundus + corpus<br>+ antrum | 15                             | 2 (1 liver,<br>1 retroperitoneal<br>lymph nodes)              | 19:0          | 6 + adenocarcinoma               | M <sup>2</sup> : 19.5                   | 4: 25.5, 36.6, 48.5, 227.8                                                                      |
| Kubota T<br>[193] (2012,<br>Japan)   | 1986–<br>2008  | 0.4 <sup>f</sup>                                  | 27 <sup>f</sup> (20:7)     | Average:<br>66.3 (±8.6) <sup>f</sup>        | Average:<br>7.27<br>(±4.43) <sup>f</sup>                           | 1 U: 5 M: 10 L<br>1: U+M+L <sup>f</sup>                                                                                              | 20 <sup>f</sup>                | 9 (4 liver,<br>2 peritoneum,<br>3 distant lymph) <sup>f</sup> | NA            | NA <sup>f</sup>                  | 5 years<br>survival: 43.8% <sup>f</sup> | 43.8% alive at 5 years <sup>f</sup>                                                             |

Table S6. Cont.

| Author<br>(Year,<br>Country)                                                | Time<br>Period | % of NECs<br>in Relation<br>to Gastric<br>Cancers | n Gastric<br>NEC<br>(M:W)  | Age (Range)                                 | Size cm<br>(Range)                          | Location in<br>Primary     | n Patients with<br>Lymph. Met. | n Patients with<br>Distant Mets. at<br>Presentation (Sites)          | n SC:<br>n LC      | Other Histological<br>Components                                           | Overall Survival<br>Mo (Range)                                                                                   | Long-Term Survivors<br>(>2 Years) (DOD, AWD,<br>NED) n: Time until<br>Death/End of Follow-Up Mo |
|-----------------------------------------------------------------------------|----------------|---------------------------------------------------|----------------------------|---------------------------------------------|---------------------------------------------|----------------------------|--------------------------------|----------------------------------------------------------------------|--------------------|----------------------------------------------------------------------------|------------------------------------------------------------------------------------------------------------------|-------------------------------------------------------------------------------------------------|
| Terashima T.<br>[115] (2012,<br>Japan)                                      | 2000–<br>2008  | NA                                                | 10 (NA)                    | NA                                          | NA                                          | NA                         | NA                             | NA                                                                   | 10 <sup>d</sup> :0 | NA                                                                         | NA (oesophagus +<br>gallbladder:<br>M <sup>2</sup> 14.9 mo)                                                      | NA                                                                                              |
| Du Z. [81]<br>(2013, China)                                                 | 2008–<br>2010  | NA                                                | 6 (5:1)                    | (47–74)                                     | NA                                          | NA                         | 3                              | 4 (3 liver, 1 lung,<br>1 peritoneum,<br>NA where lymph<br>mets are)  | NA                 | N                                                                          | (6–24)                                                                                                           | 0                                                                                               |
| Feng S.T.<br>[82] (2013,<br>China)                                          | 2009–<br>2013  | NA                                                | 16 (NA)                    | NA                                          | NA                                          | NA                         | NA                             | NA                                                                   | NA                 | NA                                                                         | NA                                                                                                               | NA                                                                                              |
| Ishida M<br>[190] (2013,<br>Japan)                                          | 1990–<br>2011  | 0.64 <sup>j</sup>                                 | 51 <sup>j</sup><br>(39:12) | M <sup>2</sup> : 70<br>(35–86) <sup>j</sup> | M <sup>2</sup> : 5<br>(1.5–15) <sup>j</sup> | 20U: 18M: 13L <sup>j</sup> | 36 <sup>j</sup>                | 13 (4 distant lymph<br>nodes, 4 liver,<br>4 peritoneum) <sup>j</sup> | 11:40 <sup>j</sup> | 7: mixed SC and LC,<br>36: adenocarcinoma<br>and/or dysplasia <sup>j</sup> | 3 years<br>survival: 57.8% <sup>j</sup>                                                                          | 57.8% alive after 3 years                                                                       |
| Kim BS.<br>[295] (2013,<br>Korea)                                           | 1997–<br>2012  | NA                                                | 13 (10:3)                  | M <sup>2</sup> : 58<br>(42–81)              | NA                                          | 4 U: 3 M: 6 L              | 4                              | 4 (NA)                                                               | 13 <sup>d</sup> :0 | NA                                                                         | M <sup>1</sup> : 40.3<br>(1.2–146.5)                                                                             | 4: 65.9, 98.2, 114.6, 146.5                                                                     |
| Korse C.M.<br>[3] (2013,<br>Netherlands<br>Cancer<br>Registry) <sup>a</sup> | 1990–<br>2010  | NA                                                | 203 (NA)                   | NA                                          | NA                                          | NA                         | NA                             | NA                                                                   | NA                 | NA                                                                         | 5 years relative<br>survival rate: LC<br>1990–2000/<br>2001–2010:<br>34/32%.<br>SC 1990–2000/<br>2001–2010: 5/6% | NA                                                                                              |





Table S6. Cont.

| Author<br>(Year,<br>Country)          | Time<br>Period | % of NECs<br>in Relation<br>to Gastric<br>Cancers | n Gastric<br>NEC<br>(M:W) | Age (Range) | Size cm<br>(Range)                                                                               | Location in<br>Primary | n Patients with<br>Lymph. Met. | n Patients with<br>Distant Mets. at<br>Presentation (Sites)                                                                                     | n SC:<br>n LC | Other Histological<br>Components | Overall Survival<br>Mo (Range)     | Long-Term Survivors<br>(>2 Years) (DOD, AWD,<br>NED) n: Time until<br>Death/End of Follow-Up Mo |
|---------------------------------------|----------------|---------------------------------------------------|---------------------------|-------------|--------------------------------------------------------------------------------------------------|------------------------|--------------------------------|-------------------------------------------------------------------------------------------------------------------------------------------------|---------------|----------------------------------|------------------------------------|-------------------------------------------------------------------------------------------------|
| Yamaguchi T.<br>[92] (2014,<br>Japan) | 2000–<br>2011  | NA                                                | 70 <sup>k</sup> (NA)      | NA          | NA                                                                                               | NA                     | NA                             | NA                                                                                                                                              | NA            | NA <sup>k</sup>                  | M <sup>2</sup> : 13.3 <sup>k</sup> | NA                                                                                              |
| TOTAL                                 | 1970–<br>2012  | 0.16–1.48                                         | 937 <sup>1</sup>          | (27–92)     | M <sup>2</sup> :<br>4.85–6<br>(1.5–15),<br>M <sup>1</sup> :<br>4.28–6.4<br>(0.4–13) <sup>1</sup> | -                      | 235/335 (4 NA) <sup>1</sup>    | 119/344 (sites where<br>mentioned: 60 sites<br>mentioned: 38 liver,<br>12 peritoneum,<br>8 distant lymph<br>nodes, 1 bone, 1 lung) <sup>1</sup> | -             | -                                | -                                  | -                                                                                               |

NEC: Neuroendocrine Carcinoma: includes WHO 2000/2004/2010 definition (poorly differentiated endocrine carcinomas, G3 tumours, small cell and large cell carcinomas); NA: Not Available; M: Men; W: Women; M<sup>1</sup>: Mean; M<sup>2</sup>: Median; Mo: Month/s; Year: Year/s; SC: Small Cell; LC: Large Cell; Met.: Metastases; CI: Confidence Intervall; DOD: Dead of disease; AWD: Alive with disease; NED: No evidence of disease; U: Upper stomach; M: Middle stomach; L: Lower stomach; LD: tumour contained within a localised anatomic region, with or without regional lymph node involvement, ED: beyond LD; <sup>a</sup> % of surgically resected gastric cancers; <sup>b</sup> 1 long survivor and 4 patients who died post-op are not in survival equation; <sup>c</sup> % of all patients who underwent a gastrectomy due to gastric cancer; <sup>d</sup> part of inclusion criteria; <sup>e</sup> “Last three decades”; <sup>f</sup> classified after the Japanese Classification of Cancer: ECC; includes both NEC and MANEC (unknown distribution!); <sup>g</sup> Unknown if lymph node metastases could also be distant metastases; <sup>h</sup> Large cell carcinomas only; <sup>i</sup> cohort includes 12 gastric MANECs, unknown distribution; <sup>j</sup> cohort includes 13 gastric MANECs, unknown distribution; <sup>k</sup> in original cohort of 258 NEC, 21 were MANECs; unknown distribution among primary sites; <sup>l</sup> after removal of possible overlapping cohorts with lowest patient numbers, and known number MANECs. Can still include an unknown number of MANECs; <sup>m</sup> prospective study, all other NA or retrospective; <sup>n</sup> not all numbers may be exact due to extrapolation from incidence rates.



Table S7. Cont.

| Author (Year, Country)              | Time Period | % of PNENs Diagnosed as NECs | n Pancreatic NEC (M:W) | Age Year (Range) | Size cm (Range)          | Location in Primary: n Caput: n Corpus:n Cauda | n Lymph. Met. | n Distant Met. at Presentation/Study Start (Sites) | n SC:n LC          | Overall Survival Mo (Range)     | Long-Term Survivors (>2 Years) n: Mo Survival (DOD, AWD or NED) |
|-------------------------------------|-------------|------------------------------|------------------------|------------------|--------------------------|------------------------------------------------|---------------|----------------------------------------------------|--------------------|---------------------------------|-----------------------------------------------------------------|
| Haider K. [12] (2006, Canada)       | 1971–2002   | NA                           | 7 (6:1)                | NA               | NA                       | NA                                             | NA            | 6 <sup>1</sup> (NA)                                | 7 <sup>k</sup> :0  | NA                              | NA                                                              |
| Kaifi J.T. [218] (2006, Germany)    | NA          | 14.2                         | 9 (NA)                 | NA               | NA                       | NA                                             | NA            | NA                                                 | NA                 | NA                              | NA                                                              |
| Kim K.O. [13] (2006, Daegu, Korea)  | 1998–2005   | NA                           | 5 (NA)                 | NA               | NA                       | NA                                             | NA            | NA                                                 | 5 <sup>k</sup> :0  | NA                              | NA                                                              |
| Rodallec M. [104] (2006, France)    | 1993–2002   | 18.9                         | 7 (NA)                 | NA               | M <sup>1</sup> : 6 (2–9) | 3 (+1 isthmus):<br>3 corpus/cauda              | NA            | NA                                                 | NA                 | (1–52)                          | 1: 52                                                           |
| Bilimoria KY [233] (2007, USA)      | 1985–2004   | 22.1 <sup>b</sup>            | 268 (NA)               | NA               | NA                       | NA                                             | NA            | NA                                                 | NA                 | NA                              | NA                                                              |
| Faggiano, A [76] (2007, France)     | 1990–2001   | NA                           | 6 (NA)                 | NA               | NA                       | NA                                             | NA            | NA                                                 | 0: 6 <sup>k</sup>  | NA                              | NA                                                              |
| Lepage C. [1] (2007, UK)            | 1986–1999   | NA                           | 68 (NA)                | NA               | NA                       | NA                                             | NA            | NA                                                 | 68 <sup>k</sup> :0 | Relative 1 year survival: 17.3% | NA                                                              |
| Ploeckinger U. [73] (2007, Germany) | 1999–2007   | NA                           | 28 (NA)                | NA               | NA                       | NA                                             | NA            | NA                                                 | NA                 | NA                              | NA                                                              |
| Sellner F. [229] (2007, Austria)    | 1985–2005   | NA                           | 11 (NA)                | NA               | NA                       | NA                                             | 6 (2 NA)      | 40% (NA)                                           | NA                 | 5 years survival: 0%            | 1: 24                                                           |







Table S7. Cont.

| Author (Year, Country)                 | Time Period | % of PNENs Diagnosed as NECs | n Pancreatic NEC (M:W) | Age Year (Range)            | Size cm (Range)            | Location in Primary: n Caput: n Corpus:n Cauda | n Lymph. Met. | n Distant Met. at Presentation/Study Start (Sites) | n SC:n LC         | Overall Survival Mo (Range) | Long-Term Survivors (>2 Years) n: Mo Survival (DOD, AWD or NED) |
|----------------------------------------|-------------|------------------------------|------------------------|-----------------------------|----------------------------|------------------------------------------------|---------------|----------------------------------------------------|-------------------|-----------------------------|-----------------------------------------------------------------|
| Roland C.L. [289] (2011, SEER, USA)    | 1980–2004   | 63.7 °                       | 247 (NA)               | NA                          | NA                         | NA                                             | NA            | NA                                                 | NA                | 1 year survival: 30% (ca)   | NA                                                              |
| Sellner F. [225] (2011, Austria)       | 1985–2008   | 55                           | 10 (NA)                | NA                          | NA                         | NA                                             | NA            | NA                                                 | NA                | 1 year survival: 38%        | 0                                                               |
| Strosberg J.R. [226] (2011, USA)       | 1999–2010   | 7.9                          | 32 (NA)                | NA                          | NA                         | NA                                             | NA            | NA                                                 | NA                | M <sup>2</sup> : 21         | NA                                                              |
| Welin S. [108] (2011, Sweden, Norway)  | 2004–2009   | NA                           | 10 (NA)                | NA                          | NA                         | NA                                             | NA            | NA                                                 | NA                | NA                          | NA                                                              |
| Winter J.M. [208] (2011, USA)          | 1970–2007   | NA                           | 6 (3:3)                | M <sup>2</sup> : 50 (27–60) | M <sup>2</sup> : 3 (3–4.5) | 6:0:0                                          | 5             | NA                                                 | 6 <sup>k</sup> :0 | M <sup>2</sup> : 20 (9–173) | 3: 26, 73, 173                                                  |
| Faggiano A. [68] (2012, Italy)         | 1990–2007   | NA                           | 19 (NA)                | NA                          | NA                         | NA                                             | NA            | NA                                                 | NA                | NA                          | NA                                                              |
| Hamilton N.M. [217] (2012, USA)        | 1994–2009   | 11.4                         | 19 (NA)                | NA                          | NA                         | NA                                             | NA            | NA                                                 | NA                | 5 years survival: 57%       | 57% alive at 5 years                                            |
| Hentic O. [85] (2012, France)          | 2000–2010   | NA                           | 10 (6:4)               | (35–72)                     | NA                         | NA                                             | NA            | 9 (NA)                                             | 3:5 (2 NA)        | (11–28)                     | 2: 28                                                           |
| Korse C.M [95] (2012, The Netherlands) | 1994–2009   | NA                           | 9 (NA)                 | NA                          | NA                         | NA                                             | NA            | NA                                                 | 0:9               | NA                          | NA                                                              |



Table S7. Cont.

| Author (Year, Country)                                               | Time Period | % of PNENs Diagnosed as NECs | n Pancreatic NEC (M:W) | Age Year (Range)                                                           | Size cm (Range)                                                      | Location in Primary: n Caput: n Corpus:n Cauda | n Lymph. Met. | n Distant Met. at Presentation/Study Start (Sites) | n SC:n LC         | Overall Survival Mo (Range)                                     | Long-Term Survivors (>2 Years) n: Mo Survival (DOD, AWD or NED) |
|----------------------------------------------------------------------|-------------|------------------------------|------------------------|----------------------------------------------------------------------------|----------------------------------------------------------------------|------------------------------------------------|---------------|----------------------------------------------------|-------------------|-----------------------------------------------------------------|-----------------------------------------------------------------|
| Olsen [122] I.H. (2012, Denmark)                                     | NA          | NA                           | 7 (NA)                 | NA                                                                         | NA                                                                   | NA                                             | NA            | 7 (NA)                                             | NA                | M <sup>2</sup> : 7                                              | NA                                                              |
| Rindi G. [236] (2012, Germany, Italy, U.K., the Netherlands, France) | 1990–2007   | 5.88                         | 63                     | 17 < 48 years, 24: 48–61, 22: >61                                          | NA                                                                   | NA                                             | NA            | NA                                                 | NA                | 32.9 rate/100 person years                                      | NA                                                              |
| Terashima T [115]. (2012, Japan)                                     | 2000–2008   | NA                           | 9 (NA)                 | M <sup>2</sup> : pancreas /biliary tract/ liver: 46.5 (27–79)              | NA                                                                   | NA                                             | NA            | 9 <sup>k,l</sup> (NA)                              | 9 <sup>k</sup> :0 | M <sup>2</sup> : 7.8 (pancreas/biliary/liver)                   | NA                                                              |
| Yachida S. [230] (2012, USA)                                         | 1988–2010   | NA                           | 19 (9:10)              | M <sup>1</sup> : SC: 56.6 (SD ± 10.1), M <sup>1</sup> LC: 55.8 (SD ± 20.6) | M <sup>1</sup> SC: 5.4 (SD ± 2.2), M <sup>1</sup> LC: 4.5 (SD ± 1.3) | 10:3:5 (1 NA)                                  | 14 (1 NA)     | NA                                                 | 9:10              | M <sup>1</sup> SC: 13.9 (1–25), M <sup>1</sup> LC: 17.9 (1–104) | 4: 24, 25, 47, 107                                              |
| Bertani E. [290] (2013, Italy)                                       | 1998–2008   | 23                           | 10 (NA)                | NA                                                                         | NA                                                                   | NA                                             | NA            | 23 <sup>k</sup> (NA)                               | NA                | NA                                                              | NA                                                              |

Table S7. Cont.

| Author (Year, Country)                             | Time Period | % of PNENs Diagnosed as NECs | n Pancreatic NEC (M:W) | Age Year (Range) | Size cm (Range)                                         | Location in Primary: n Caput: n Corpus:n Cauda | n Lymph. Met. | n Distant Met. at Presentation/Study Start (Sites) | n SC:n LC | Overall Survival Mo (Range)                                                               | Long-Term Survivors (>2 Years) n: Mo Survival (DOD, AWD or NED) |
|----------------------------------------------------|-------------|------------------------------|------------------------|------------------|---------------------------------------------------------|------------------------------------------------|---------------|----------------------------------------------------|-----------|-------------------------------------------------------------------------------------------|-----------------------------------------------------------------|
| Cherenfant J [212] (2013, USA)                     | 1998–2011   | 14.1                         | 18 (NA)                | NA               | 2: 1–2 cm,<br>3: 2.1–3 cm,<br>2: 3.1–4 cm,<br>11: >4 cm | NA                                             | NA            | NA                                                 | NA        | NA                                                                                        | NA                                                              |
| Delektorskaya V.V. [67] (2013, Russia)             | 1994–2011   | 11.3                         | 8 (NA)                 | NA               | M <sup>1</sup> : 12.5 (2–16)                            | NA                                             | 6             | 7 (NA)                                             | NA        | NA                                                                                        | NA                                                              |
| Henderson-Jackson, E.B. [291] (2013, USA)          | 1990–2007   | 10.2                         | 6 (NA)                 | NA               | NA                                                      | NA                                             | NA            | NA                                                 | NA        | NA                                                                                        | NA                                                              |
| Korse C.M. [3] (2013, Netherlands Cancer Registry) | 1990–2010   | NA                           | 433 <sup>n</sup> (NA)  | NA               | NA                                                      | NA                                             | NA            | NA                                                 | NA        | 5 years relative survival: LC 1990–2000/ 2001–2010: 44/39%. SC 1990–2000/ 2001–2010: 0/6% | NA                                                              |
| Kuo E.J. [292] (2013, USA)                         | 1988–2009   | 14.2                         | 110 (NA)               | NA               | ≤2 cm: 11,<br>>2 cm: 99                                 | NA                                             | NA            | NA                                                 | NA        | NA                                                                                        | NA                                                              |
| Liu T.C. [239] (2013, USA)                         | 1993–2009   | NA                           | 8 (NA)                 | NA               | NA                                                      | NA                                             | NA            | NA                                                 | NA        | M <sup>2</sup> : 25.5                                                                     | NA                                                              |

Table S7. Cont.

| Author (Year, Country)                          | Time Period | % of PNENs Diagnosed as NECs | n Pancreatic NEC (M:W) | Age Year (Range)            | Size cm (Range)           | Location in Primary: n Caput: n Corpus:n Cauda | n Lymph. Met. | n Distant Met. at Presentation/Study Start (Sites)   | n SC:n LC        | Overall Survival Mo (Range)                     | Long-Term Survivors (>2 Years) n: Mo Survival (DOD, AWD or NED) |
|-------------------------------------------------|-------------|------------------------------|------------------------|-----------------------------|---------------------------|------------------------------------------------|---------------|------------------------------------------------------|------------------|-------------------------------------------------|-----------------------------------------------------------------|
| Martin-Perez [210] (2013, Spain)                | 2001–2010   | 11.2 <sup>f</sup>            | 21 (NA)                | NA                          | NA                        | NA                                             | NA            | NA                                                   | NA               | 5 years survival: 17.4%                         | NA                                                              |
| Sorbye H. [4] (2013, 12 Nordic hospitals)       | 2000–2009   | NA                           | 71 (NA)                | NA                          | NA                        | NA                                             | NA            | NA                                                   | NA               | M <sup>2</sup> : 15 (CI 95%: 10.3–19.7)         | NA                                                              |
| Toste P.A. [228] (2013, USA)                    | 1989–2012   | 6                            | 7 (NA)                 | NA                          | NA                        | NA                                             | NA            | NA                                                   | NA               | NA                                              | NA                                                              |
| Van der Zwan J.M. [284] (2013 RARECARE, Europe) | 1995–2002   | NA                           | 128                    | NA                          | NA                        | NA                                             | NA            | NA                                                   | NA               | NA                                              | NA                                                              |
| Vélayoudom-Céphise F.L. [90] (2013, France)     | 2000–2005   | NA                           | 9 (NA)                 | NA                          | NA                        | NA                                             | NA            | NA (9 lymph and or distant metastases <sup>l</sup> ) | 0:9 <sup>k</sup> | NA                                              | NA                                                              |
| Basturk O. [125] (2014, USA)                    | 1988–2012   | NA                           | 44 (26:18)             | M <sup>1</sup> : 59 (21–82) | M <sup>2</sup> : 4 (2–18) | 27:3:11 (3 NA)                                 | 34            | 11 (11 liver, 8 lymph nodes)                         | 17:27            | M <sup>2</sup> : 11 (0–104) (of those who died) | NA: 8 alive: median follow-up 19.5 mo (0–71)                    |
| Crippa S. [224] (2014, Italy)                   | 1990–2009   | 10.4                         | 37 (NA)                | NA                          | NA                        | NA                                             | NA            | NA                                                   | NA               | NA                                              | NA                                                              |
| Ellison, T.A. [214] (2014, USA)                 | 1984–2011   | 6.5                          | 18 (NA)                | NA                          | NA                        | NA                                             | NA            | NA                                                   | NA               | M <sup>2</sup> : 20 (13–31)                     | 9% alive at 5 years                                             |

Table S7. Cont.

| Author (Year, Country)          | Time Period | % of PNENs Diagnosed as NECs                             | n Pancreatic NEC (M:W)                               | Age Year (Range) | Size cm (Range) | Location in Primary: n Caput: n Corpus:n Cauda        | n Lymph. Met.             | n Distant Met. at Presentation/Study Start (Sites)                                                                            | n SC:n LC | Overall Survival Mo (Range) | Long-Term Survivors (>2 Years) n: Mo Survival (DOD, AWD or NED) |
|---------------------------------|-------------|----------------------------------------------------------|------------------------------------------------------|------------------|-----------------|-------------------------------------------------------|---------------------------|-------------------------------------------------------------------------------------------------------------------------------|-----------|-----------------------------|-----------------------------------------------------------------|
| Hashim Y.M. [293] (2014, USA)   | 1994–2012   | 11                                                       | 15 (NA)                                              | NA               | NA              | NA                                                    | 10                        | 0 <sup>k</sup>                                                                                                                | NA        | M <sup>2</sup> : 7.1 years  | NA                                                              |
| Liu B. [294] (2014, USA)        | 1988–2012   | 3.5                                                      | 9 (NA)                                               | NA               | NA              | NA                                                    | NA                        | NA                                                                                                                            | NA        | NA                          | NA                                                              |
| Yamaguchi T. [92] (2014, Japan) | 2000–2011   | NA                                                       | 35 <sup>i</sup> (NA)                                 | NA               | NA              | NA                                                    | NA                        | NA                                                                                                                            | NA        | M <sup>2</sup> : 8.5        | NA                                                              |
| TOTAL                           | 1951–2012   | 14.6 average (24 studies included) <sup>j</sup> (3.9–55) | 2149 <sup>j</sup> (M: 69/108 F: 39/108) <sup>j</sup> | (13–90)          | (1–18)          | 43 (+1 isthmus): 6: 13 (+3 corpus/cauda) <sup>j</sup> | 75/102 (74%) <sup>j</sup> | 82/142 (58%) <sup>j</sup> (met. as inclusion criteria not included) (sites: 21 liver, 9 distant lymph; mentioned in 22 cases) | -         | -                           | -                                                               |

<sup>a</sup> Prospective study, all others are retrospective or NA; <sup>b</sup> only 12.3% of the total 9821 patients had a histological diagnosis of differentiation; <sup>c</sup> only 311/1483 PNEN cases had a histological grade; <sup>d</sup> only 614/2158 PNENs had a histological classification; <sup>e</sup> only 635/2350 PNEN cases had a histological grade; <sup>f</sup> only 188/483 PNEN cases had a ki-67 index; <sup>g</sup> only information for 16 cases; <sup>h</sup> only 30 included due to inclusion criteria; <sup>i</sup> in larger cohort 21/258 cases were diagnosed as MANEC; unknown distribution); <sup>j</sup> after removal of possible overlapping cohorts with lowest case numbers; <sup>k</sup> part of inclusion criteria; <sup>l</sup> described as “extensive disease”: disease beyond the organ of origin and locoregional lymph nodes; <sup>m</sup> might not be exact numbers: extrapolated from incidence rates; PNEN: Pancreatic Neuroendocrine Neoplasm; NEC: Neuroendocrine Carcinoma: includes WHO 2000/2004/2010 definition (poorly differentiated endocrine carcinomas, G3 tumours, small cell and large cell carcinomas); NA: Not Available; M: Men; W: Women; M<sup>1</sup>: Mean; M<sup>2</sup>: Median; Year: Year/s; SC: Small Cell; LC: Large Cell; Met.: Metastases; CI: Confidence Interval; DOD: Dead of disease; AWD: Alive with disease; NED: No evidence of disease.

**Table S8.** Overview of Studies Including Gallbladder Neuroendocrine Carcinomas.

| Author<br>(Year,<br>Country) <sup>a</sup>  | Time<br>Period  | % of NECs<br>in Relation to<br>Gallbladder<br>Cancer | <i>n</i><br>Gallbladder<br>NEC (M:W) | <i>n</i> +<br>Gallstones | Age<br>(Range)                | Size cm<br>(Range)   | Symptoms                                                                                                                                       | <i>n</i> Lymph<br>Met | <i>n</i> Distant Met                                                                                                         | <i>n</i> SC:<br><i>n</i> LC | <i>N</i> + Other<br>Histological<br>Components      | Overall<br>Survival<br>Mo (Range)                      | Long-Term Survivors<br>(>2 Years) (DOD, AWD,<br>NED) <i>n</i> : Time until<br>Death/End of Follow-Up Mo |
|--------------------------------------------|-----------------|------------------------------------------------------|--------------------------------------|--------------------------|-------------------------------|----------------------|------------------------------------------------------------------------------------------------------------------------------------------------|-----------------------|------------------------------------------------------------------------------------------------------------------------------|-----------------------------|-----------------------------------------------------|--------------------------------------------------------|---------------------------------------------------------------------------------------------------------|
| Albores-Saavedra J.A. [253] (1980, Mexico) | 1954–1978       | 3.1 <sup>b</sup>                                     | 5 (2:3)                              | 5                        | M <sup>1</sup> : 64 (55–74)   | NA                   | 5 right upper quadrant pain, 2 vomiting, 2 hepatomegaly/palpable mass, 3 jaundice, 3 loss of weight, 2 acholia, 1 pruritus, 1 lymphadenopathy, | 5                     | 5 (4 distant lymph nodes, 3 liver, 1 diaphragm, 1 peritoneum , 1 pleura)                                                     | 5:0                         | 1+ well-differentiated adenocarcinoma               | NA                                                     | 0 (1 NA)                                                                                                |
| Albores-Saavedra J. [248] (1984, Mexico)   | NA <sup>c</sup> | 4.2                                                  | 19 (2:17)                            | 18                       | M <sup>1</sup> : 62.7 (49–79) | All except one >7 cm | NA                                                                                                                                             | 18                    | 18 (4 distant lymph mets, 18 liver, 4 lung, 2 pleura, 3 peritoneum, 1 ovaries, 1 diaphragma, 1 pancreas)                     | 19 <sup>d</sup> :0          | 4 + well-differentiated adenocarcinoma              | (NA–13)                                                | 0                                                                                                       |
| Guo K.J. [296] (1987, Japan)               | NA              | 2.8                                                  | 8 (3:5)                              | 3                        | (44–73)                       | NA                   | NA                                                                                                                                             | NA                    | 10 (10 liver, 8 regional lymph nodes, 4 bile ducts, 4 pancreas, 4 duodenum, 4 lung, 3 peritoneum, 2 colon, 2 ovary, 4 other) | 8:0                         | NA                                                  | (2–9)<br>(3 NA)                                        | 1: 56                                                                                                   |
| Nishihara K [252] (1993, Japan)            | NA              | 4.1                                                  | 15 (6:9)                             | 4                        | M <sup>1</sup> : 64.5 (43–83) | NA                   | 11: abdominal pain, 2: abdominal mass, 1: jaundice, 1: ascites                                                                                 | 10                    | 9 (9 liver, 3 pancreas, 2 duodenum/omentum/colon, 3 common bile duct, 1 lung) 1 NA                                           | 15 <sup>d</sup> :0          | 2 + adenocarcinoma, 1 + squamous and adenocarcinoma | M <sup>1</sup> survival: 5.8–28.1 (2 mo–5 years 11 mo) | 1: 2 years 4 mo, 5 years 11 mo                                                                          |

Table S8. Cont.

| Author<br>(Year,<br>Country) <sup>a</sup> | Time<br>Period | % of NECs<br>in Relation to<br>Gallbladder<br>Cancer | <i>n</i><br>Gallbladder<br>NEC (M:W) | <i>n</i> +<br>Gallstones | Age<br>(Range)                 | Size cm<br>(Range)            | Symptoms                                       | <i>n</i> Lymph<br>Met | <i>n</i> Distant Met                                    | <i>n</i> SC:<br><i>n</i> LC | <i>N</i> + Other<br>Histological<br>Components                                                                                   | Overall<br>Survival<br>Mo (Range)    | Long-Term Survivors<br>(>2 Years) (DOD, AWD,<br>NED) <i>n</i> : Time until<br>Death/End of Follow-Up Mo |
|-------------------------------------------|----------------|------------------------------------------------------|--------------------------------------|--------------------------|--------------------------------|-------------------------------|------------------------------------------------|-----------------------|---------------------------------------------------------|-----------------------------|----------------------------------------------------------------------------------------------------------------------------------|--------------------------------------|---------------------------------------------------------------------------------------------------------|
| Moskal T.L.<br>[251] (1999,<br>USA)       | 1971–<br>1997  | 3.5                                                  | 5 (2:3)                              | 4                        | M <sup>2</sup> : 69<br>(40–71) | NA                            | 4: abdominal pain, 1: fever,<br>1: weight loss | 5                     | 1–5 (3 liver, 3 lungs,<br>1 peritoneum, 1 bone)         | 5 <sup>d</sup> :0           | 3 +<br>adenocarcinoma                                                                                                            | M <sup>2</sup> : 31<br>(13–189)      | 3: 31, 44, 189                                                                                          |
| Maitra A<br>[250] (2001,<br>USA)          | NA             | NA                                                   | 12 (7:5)                             | 12                       | M <sup>1</sup> : 69<br>(37–85) | M <sup>1</sup> : 3.0<br>(0–8) | 12: Cholecystitis                              | 5                     | 7 (4 liver, 3 soft tissue,<br>1 pancreas)               | 12 <sup>d</sup> :0          | 7 +<br>adenocarcinoma<br><i>in situ</i> , 4 +<br>adenocarcinoma,<br>1 + squamous<br>cell carcinoma,<br>1 + high grade<br>sarcoma | M <sup>2</sup> : 9<br>(3–25 mo)      | 1: 25                                                                                                   |
| Brenner B.<br>[7] (2004,<br>USA)          | 1980–<br>2002  | NA                                                   | 5 (NA)                               | NA                       | NA                             | NA                            | NA                                             | NA                    | NA                                                      | 5 <sup>d</sup> :0           | NA                                                                                                                               | NA                                   | NA                                                                                                      |
| Lee S.S.<br>[15] (2007,<br>Korea)         | 1995–<br>2004  | NA                                                   | 15 (NA) <sup>e</sup>                 | NA                       | NA                             | NA                            | NA                                             | NA                    | 86% liver mets,<br>peritoneum mets 28%,<br>bone mets 7% | 15 <sup>d</sup> :0          | NA                                                                                                                               | M <sup>2</sup> : 4<br>(1.5–17.5)     | 0                                                                                                       |
| Lepage C.<br>[1] (2007,<br>UK)            | 1986–<br>1999  | NA                                                   | 10 (NA)                              | NA                       | NA                             | NA                            | NA                                             | NA                    | NA                                                      | 10 <sup>d</sup> :0          | NA                                                                                                                               | Relative<br>1 year<br>survival: 28.2 | NA                                                                                                      |

Table S8. Cont.

| Author<br>(Year,<br>Country) <sup>a</sup>    | Time<br>Period  | % of NECs<br>in Relation to<br>Gallbladder<br>Cancer | <i>n</i><br>Gallbladder<br>NEC (M:W) | <i>n</i> +<br>Gallstones | Age<br>(Range)                                             | Size cm<br>(Range)              | Symptoms | <i>n</i> Lymph<br>Met       | <i>n</i> Distant Met      | <i>n</i> SC:<br><i>n</i> LC | <i>N</i> + Other<br>Histological<br>Components | Overall<br>Survival<br>Mo (Range)                                          | Long-Term Survivors<br>(>2 Years) (DOD, AWD,<br>NED) <i>n</i> : Time until<br>Death/End of Follow-Up Mo |
|----------------------------------------------|-----------------|------------------------------------------------------|--------------------------------------|--------------------------|------------------------------------------------------------|---------------------------------|----------|-----------------------------|---------------------------|-----------------------------|------------------------------------------------|----------------------------------------------------------------------------|---------------------------------------------------------------------------------------------------------|
| Albores-<br>Saavedra<br>[249] (2009,<br>USA) | 1973–<br>2005   | 0.38:<br>gallbladder.<br>0.19: EHBD                  | 71 (25:46) <sup>f</sup>              | NA                       | M <sup>1</sup> :<br>gallbladder:<br>67.5,<br>EHBD:<br>68.4 | 22: >2 cm,<br>2: ≤2cm,<br>27 NA | NA       | NA                          | 37 (5 NA)                 | 71:0                        | NA                                             | 5 years<br>survival<br>gallbladder:<br>8%, 5 years<br>survival<br>EHBD: 0% | 8% alive at 5 years                                                                                     |
| Lepage C.<br>[79] (2009,<br>EUROCARE)        | 1985–<br>1994   | NA                                                   | 48 (NA)                              | NA                       | NA                                                         | NA                              | NA       | NA                          | NA                        | 123 <sup>d</sup> :0         | NA                                             | 5 years<br>relative<br>survival:<br>10.3                                   | NA                                                                                                      |
| Wong Y.N.<br>[65] (2009,<br>UK)              | 1970–<br>2004   | NA                                                   | 15 (NA)                              | NA                       | NA                                                         | NA                              | NA       | NA                          | NA                        | 15 <sup>d</sup> :0          | NA                                             | NA                                                                         | NA                                                                                                      |
| TOTAL                                        | (1954–<br>2005) | (0.38–4.2)                                           | 190 <sup>g</sup>                     | 38/51<br>(74.5%)         | (37–85) <sup>g</sup>                                       |                                 |          | 38/51<br>(75%) <sup>g</sup> | 72/122 (59%) <sup>g</sup> |                             |                                                |                                                                            |                                                                                                         |

NEC: Neuroendocrine Carcinoma: includes WHO 2000/2004/2010 definition (poorly differentiated endocrine carcinomas, G3 tumours, small cell and large cell carcinomas); NA: Not Available; M: Men; W: Women; M<sup>1</sup>: Mean; M<sup>2</sup>: Median; Mo: Month/s; Year: Year/s; SC: Small Cell; LC: Large Cell; Met.: Metastases; EHBD: Extra Hepatic Bile Duct; CI: Confidence Intervall; DOD: Dead of disease; AWD: Alive with disease; NED: No evidence of disease; <sup>a</sup> all studies are retrospective; <sup>b</sup> of all invasive gallbladder carcinomas; <sup>c</sup> over a 25-year period; <sup>d</sup> part of inclusion criteria; <sup>e</sup> 14 gallbladder, 1 common bile duct; <sup>f</sup> 54 gallbladder, 17 extrahepatic bile duct; <sup>g</sup> after removal of possible overlapping cohorts with lowest patient numbers.

**Table S9.** Overview of Studies Including Small Intestinal Neuroendocrine Carcinomas.

| Author (Year, Country) <sup>a</sup>                 | Time Period | % of NECs Relative to Carcinomas of the Small Intestine | <i>n</i> Small Intestinal NECs (M:W) | Age Year (Range)    | Size cm (Range)              | Location in Primary  | Lymph. Mets | Distant Mets. at Presentation | <i>n</i> SC: <i>n</i> LC | Other Histological Components | Overall Survival Mo (Range)                                                                                      | Long-Term Survivors (>2 Years) (DOD, AWD, NED) <i>n</i> : Time until Death/End of Follow-Up Mo) |
|-----------------------------------------------------|-------------|---------------------------------------------------------|--------------------------------------|---------------------|------------------------------|----------------------|-------------|-------------------------------|--------------------------|-------------------------------|------------------------------------------------------------------------------------------------------------------|-------------------------------------------------------------------------------------------------|
| Nassar H. [255] (2005, USA)                         | 1965–2004   | 2%–3% of ampullary tumours                              | 14 (10:4)                            | M <sup>1</sup> : 70 | M <sup>1</sup> : 2.5 (0.8–4) | 14 Ampullar of Vater | 10 (1 NA)   | 3 (2 brain, 1 liver)          | 6:8                      | 7 + adenoma, 1 + squamous     | M <sup>1</sup> : 14.5 (4–30) <sup>b</sup><br>4 alive: 6,10,17,48                                                 | 1: 48                                                                                           |
| Lepage C. [1] (2007, UK)                            | 1986–1999   | NA                                                      | 8 (NA)                               | NA                  | NA                           | NA                   | NA          | NA                            | 8 :0                     | NA                            | 1 years relative survival: 27.1%                                                                                 | NA                                                                                              |
| Ploeckinger U. [73] (2007, Germany)                 | 1999–2007   | NA                                                      | 13 (NA)                              | NA                  | NA                           | NA                   | NA          | NA                            | NA                       | NA                            | NA                                                                                                               | NA                                                                                              |
| Landry C.S. [260] (2008, USA)                       | 1977–2004   | NA                                                      | 48 (NA)                              | NA                  | NA                           | NA                   | NA          | NA                            | NA                       | NA                            | NA                                                                                                               | NA                                                                                              |
| Albores-Saavedra J. [258] (2010, USA)               | 1973–2006   | 0.25                                                    | 15 (NA)                              | NA                  | NA                           | 15 Ampulla of Vater  | NA          | NA                            | 9:6                      | NA                            | 5 years survival: 15.7%                                                                                          | NA                                                                                              |
| Grossman R.A. [11] (2011, USA)                      | 1973–2006   | NA                                                      | 13 (NA)                              | NA                  | NA                           | NA                   | NA          | NA                            | 13 :0                    | NA                            | NA                                                                                                               | NA                                                                                              |
| Dumitrascu T. [256] (2012, Romania)                 | NA          | NA                                                      | 9 <sup>d</sup> (NA)                  | NA                  | (1–3.5)                      | 9 Ampulla of Vater   | 5.00        | NA                            | NA                       | NA                            | (7–52)                                                                                                           | 1: 52                                                                                           |
| Korse C.M. [3] (2013, the Netherlands) <sup>e</sup> | 1990–2010   | NA                                                      | 97 (NA)                              | NA                  | NA                           | NA                   | NA          | NA                            | NA                       | NA                            | 5 years relative survival rate: LC<br>1990–2000/2001–2010:<br>25/27%, Small cell<br>1990–2000/2001–2010:<br>7/3% | NA                                                                                              |



Table S9. Cont.

| Author (Year, Country) <sup>a</sup> | Time Period | % of NECs Relative to Carcinomas of the Small Intestine | <i>n</i> Small Intestinal NECs (M:W) | Age Year (Range) | Size cm (Range) | Location in Primary                  | Lymph. Mets | Distant Mets. at Presentation | <i>n</i> SC: <i>n</i> LC | Other Histological Components | Overall Survival Mo (Range)        | Long-Term Survivors (>2 Years) (DOD, AWD, NED) <i>n</i> : Time until Death/End of Follow-Up Mo) |
|-------------------------------------|-------------|---------------------------------------------------------|--------------------------------------|------------------|-----------------|--------------------------------------|-------------|-------------------------------|--------------------------|-------------------------------|------------------------------------|-------------------------------------------------------------------------------------------------|
| Randle R.W. [257] (2014, USA)       | 1988–2009   | NA                                                      | 58 (NA)                              | NA               | NA              | 38 duodenum, 20 Ampulla of Vater     | NA          | NA                            | NA                       | NA                            | NA                                 | NA                                                                                              |
| Untch B.R. [297] (2014, USA)        | 1983–2011   | NA                                                      | 10 (NA)                              | 65 ± 11 years    | 2.6 ± 1         | 8 Ampulla of Vater, 2 other duodenal | 7           | 0 <sup>f</sup>                | NA                       | NA                            | M <sup>2</sup> : 15                | NA                                                                                              |
| Yamaguchi T. [92] (2014, Japan)     | 2000–2011   | NA                                                      | 6 <sup>g</sup> (NA)                  | NA               | NA              | NA                                   | NA          | NA                            | NA                       | NA <sup>g</sup>               | M <sup>2</sup> : 29.7 <sup>g</sup> | NA                                                                                              |
| TOTAL                               | (1965–2011) | -                                                       | 205.00                               | -                | -               | -                                    | -           | -                             | -                        | -                             | -                                  | -                                                                                               |

NEC: Neuroendocrine Carcinoma: includes WHO 2000/2004/2010 definition (poorly differentiated endocrine carcinomas, G3 tumours, small cell and large cell carcinomas); NA: Not Available; M: Men; W: Women; M<sup>1</sup>: Mean; M<sup>2</sup>: Median; Mo: Month/s; Year: Year/s; SC: Small Cell; LC: Large Cell; Met.: Metastases; CI: Confidence Intervall; DOD: Dead of disease; AWD: Alive with disease; NED: No evidence of disease; <sup>a</sup> all studies are retrospective; <sup>b</sup> only those who died; <sup>c</sup> part of inclusion criteria; <sup>d</sup> total from a review of the literature after removal of studies already presented; <sup>e</sup> not all numbers may be exact due to extrapolation from incidence rates; <sup>f</sup> all tumours with metastases were excluded; <sup>g</sup> original cohort of 258 NECs includes 21 MANECs, unknown distribution.

**Table S10.** Overview of Studies Including Colorectal Neuroendocrine Carcinomas.

| Author<br>(Year,<br>Country)                    | Time<br>Period | % of<br>Colorectal<br>Cancers | n Colorectal<br>NEC (M:W) | n Colonic NEC:<br>n Rectal NEC<br>(n Specified Location)                                     | Age Year<br>(Range)                                                             | Size cm<br>(Range) | n Lymph.<br>Met. | n Distant Met. at<br>Presentation/Study<br>Start (Specified Sites)                     | n SC:n LC                          | Other Histological<br>Components                                                                | Overall<br>Survival Mo<br>(Range) | Long-Term Survivors<br>(>2 Years, DOD, AWD, NED), n:<br>Time Til Death/Follow-Up Mo |
|-------------------------------------------------|----------------|-------------------------------|---------------------------|----------------------------------------------------------------------------------------------|---------------------------------------------------------------------------------|--------------------|------------------|----------------------------------------------------------------------------------------|------------------------------------|-------------------------------------------------------------------------------------------------|-----------------------------------|-------------------------------------------------------------------------------------|
| Mills S.E.<br>[276] (1983,<br>USA)              | NA             | NA                            | 5 (2:3)                   | 2:3 (2 cecum, 3 rectum)                                                                      | (53–74)                                                                         | (0.3–7)            | 5                | 4 (4 liver,<br>1 peritoneum, 1 lung,<br>1 bone marrow,<br>1 paraaortic<br>lymph nodes) | 5:0                                | 4 + adenomatous<br>neoplasms                                                                    | (1–3)                             | 0                                                                                   |
| Wick M.R.<br>[275] (1987,<br>USA)               | NA             | NA                            | 10 (5:5)                  | NA                                                                                           | Average:<br>63 (40–75)                                                          | (3–13)             | 6                | 7 (7 liver, other NA)                                                                  | 10:0                               | 1 + adenocarcinoma                                                                              | Average:<br>5 (NA–11)             | 0                                                                                   |
| Staren, E.D.<br>[263] (1988,<br>USA)            | 1980–<br>1987  | 1.9                           | 13 (7:6)                  | 9:4 (5 cecum,<br>2 sigmoid colon,<br>1 transverse colon,<br>1 descending colon,<br>4 rectum) | M <sup>2</sup> : 72<br>(28–89)                                                  | NA                 | 8                | 6 (5 liver, 1 bone,<br>unknown<br>if distant lymph)                                    | 7:5                                | 8 + glandular/squamous<br>differentiation,<br>3 glandular/squamous<br>differentiation + adenoma | M <sup>2</sup> : 7 (2–68)         | 2: 30, 68                                                                           |
| Burke A.B.<br>[266] (1990,<br>USA) <sup>a</sup> | 1986–<br>1988  | NA                            | 38 (22:16)                | 15:22 (7 left colon,<br>8 right colon,<br>22 rectum) (1 NA)                                  | Mean: 63                                                                        | NA                 | 89%              | 71%                                                                                    | 38 <sup>b</sup> :0                 | 17 + adenoma,<br>10 + adenocarcinoma,<br>9 + squamous change                                    | 36% alive after<br>5 mo follow-up | NA                                                                                  |
| Gaffey M.J.<br>[267] (1990,<br>USA)             | NA             | NA                            | 22 (12:10)                | 15:7 (9 cecum,<br>5 sigmoideum,<br>1 transversum,<br>7 rectum)                               | SC M <sup>1</sup> : 64,<br>intermedia<br>te cell M <sup>1</sup> :<br>66 (34–87) | (0.3–15)           | 18               | 15 (13 liver, 1 bone,<br>1 peritoneum,<br>1 diaphragm,<br>1 duodenum)                  | 6:0 (16<br>intermediate/<br>small) | 15 + adenomatous<br>component, 6 +<br>squamous component                                        | Average 8.2<br>(1–72) 7 NA        | 1: 72                                                                               |

Table S10. Cont.

| Author<br>(Year,<br>Country)                     | Time<br>Period | % of<br>Colorectal<br>Cancers | n Colorectal<br>NEC (M:W) | n Colonic NEC:<br>n Rectal NEC<br>(n Specified Location)       | Age Year<br>(Range)            | Size cm<br>(Range) | n Lymph.<br>Met.                                  | n Distant Met. at<br>Presentation/Study<br>Start (Specified Sites)              | n SC:n LC           | Other Histological<br>Components                                         | Overall<br>Survival Mo<br>(Range) | Long-Term Survivors<br>(>2 Years, DOD, AWD, NED), n:<br>Time Til Death/Follow-Up Mo |
|--------------------------------------------------|----------------|-------------------------------|---------------------------|----------------------------------------------------------------|--------------------------------|--------------------|---------------------------------------------------|---------------------------------------------------------------------------------|---------------------|--------------------------------------------------------------------------|-----------------------------------|-------------------------------------------------------------------------------------|
| Spread C.<br>[271] (1994,<br>Canada)             | 1964–<br>1988  | NA                            | 16 (NA)                   | 16:0 (NA)                                                      | NA                             | NA                 | 22%<br>Dukes’<br>stage C                          | 64% Dukes’ stage D<br>(48% liver, 30% liver<br>+ other site, 22%<br>other site) | 0:16 <sup>b</sup>   | NA                                                                       | M <sup>2</sup> : 4.5 <sup>c</sup> | NA                                                                                  |
| Galanis E.<br>[9] (1997,<br>USA)                 | 1974–<br>1994  | NA                            | 13 (NA)                   | NA                                                             | NA                             | NA                 | NA                                                | NA (6 LD)                                                                       | 13 <sup>b</sup> : 0 | NA                                                                       | NA                                | NA                                                                                  |
| Vortmeyer<br>A.O. [272]<br>(1997, USA)           | NA             | NA                            | 9 (5:4)                   | 7:2 (2 cecum,<br>4 ascending colon,<br>1 transverse, 2 rectum) | Average:<br>49 (36–60)         | NA                 | 5                                                 | 3 (3 liver)                                                                     | NA                  | 4 + adenocarcinoma,<br>1 + adenoma,<br>2 + adenocarcinoma<br>and adenoma | NA                                | NA                                                                                  |
| Ordóñez<br>N.G. [36]<br>(2000, USA)              | NA             | NA                            | 11 (NA)                   | 11:0 (NA)                                                      | NA                             | NA                 | NA                                                | NA                                                                              | 11 <sup>b</sup> :0  | NA                                                                       | NA                                | NA                                                                                  |
| Akintola-<br>Ogunremi O.<br>[274] (2003,<br>USA) | NA             | NA                            | 66 (35:31)                | NA                                                             | M <sup>1</sup> : 62<br>(30–91) | NA                 | 92% +<br>lymph<br>and/or<br>distant<br>metastases | 92% + lymph and/or<br>distant metastases<br>(mostly liver)                      | 36:30               | 32 + adenoma and/or<br>adenocarcinoma                                    | M <sup>2</sup> : 8–9              | 2: >3 years                                                                         |
| Pizzi S. [38]<br>(2003, Italy)                   | NA             | NA                            | 9 (6:3)                   | 9:0 (NA)                                                       | (63–81)                        | NA                 | 6                                                 | 3 (3 liver, 1 lung)<br>unknown if lymph are<br>distant mets                     | NA                  | NA                                                                       | NA                                | NA                                                                                  |

Table S10. Cont.

| Author<br>(Year,<br>Country)         | Time<br>Period | % of<br>Colorectal<br>Cancers | n Colorectal<br>NEC (M:W) | n Colonic NEC:<br>n Rectal NEC<br>(n Specified Location)                                                                                    | Age Year<br>(Range)                                                                        | Size cm<br>(Range)                                                           | n Lymph.<br>Met. | n Distant Met. at<br>Presentation/Study<br>Start (Specified Sites) | n SC:n LC          | Other Histological<br>Components        | Overall<br>Survival Mo<br>(Range)                        | Long-Term Survivors<br>(>2 Years, DOD, AWD, NED), n:<br>Time Til Death/Follow-Up Mo |
|--------------------------------------|----------------|-------------------------------|---------------------------|---------------------------------------------------------------------------------------------------------------------------------------------|--------------------------------------------------------------------------------------------|------------------------------------------------------------------------------|------------------|--------------------------------------------------------------------|--------------------|-----------------------------------------|----------------------------------------------------------|-------------------------------------------------------------------------------------|
| Stelow, E.B.<br>[282] (2003,<br>USA) | NA             | NA                            | 15 (9:6)                  | 10:3 (6 right colon,<br>4 sigmoid colon,<br>3 rectum) (2NA)                                                                                 | M <sup>1</sup> : 73<br>(44–87)                                                             | M <sup>1</sup> : 6.6<br>(0.4–15)                                             | NA               | NA                                                                 | 15 <sup>b</sup> :0 | 11 + adenoma                            | NA                                                       | NA                                                                                  |
| Bernick P.E.<br>[264] (2004,<br>USA) | 1977–<br>1998  | <1%                           | 38 (17:21) <sup>d</sup>   | 17:20 (8 cecum,<br>2 right colon, 1 hepatic<br>flexure, 3 transverse<br>colon, 3 sigmoid<br>colon), 14 rectum,<br>6 anal canal, 1 appendix) | M <sup>1</sup> : 57<br>(29–86) <sup>d</sup>                                                | NA                                                                           | NA               | 25 (2 NA) <sup>d</sup>                                             | 22:16 <sup>d</sup> | NA                                      | M <sup>2</sup> : 10.5 (95%<br>CI: 6.7–18.9) <sup>d</sup> | 26% alive at 2 years <sup>d</sup>                                                   |
| Brenner B.<br>[7] (2004,<br>USA)     | 1980–<br>2002  | NA                            | 25 (NA)                   | 13:12 (13 colon,<br>10 rectum,<br>2 anal canal)                                                                                             | NA                                                                                         | NA                                                                           | NA               | NA                                                                 | 25 <sup>b</sup> :0 | 11 + adenoma,<br>1 + ulcerative colitis | NA                                                       | NA                                                                                  |
| Furlan D.<br>[39] (2004,<br>Italy)   | NA             | NA                            | 7 (4:3)                   | NA                                                                                                                                          | (50–77)                                                                                    | (2.5–7)                                                                      | 5                | 2 (2 liver) NA if<br>lymph were also mets,<br>2 NA                 | NA                 | NA                                      | Average:<br>15 (1–72)                                    | 1: 72                                                                               |
| La Rosa S.<br>[58] (2004,<br>Italy)  | NA             | NA                            | 10 (6:4)                  | 6:4 (6 right colon,<br>4 rectum)                                                                                                            | Colon: M <sup>1</sup> :<br>67.5<br>(50–92),<br>Rectum: m<br>M <sup>1</sup> : 61<br>(56–67) | M <sup>1</sup> colon:<br>4 (2.5–7),<br>Rectum: M <sup>1</sup><br>3.7 (1.3–7) | NA               | 9                                                                  | NA                 | NA                                      | NA                                                       | NA                                                                                  |

Table S10. Cont.

| Author<br>(Year,<br>Country)                        | Time<br>Period | % of<br>Colorectal<br>Cancers | n Colorectal<br>NEC (M:W) | n Colonic NEC:<br>n Rectal NEC<br>(n Specified Location) | Age Year<br>(Range) | Size cm<br>(Range)                               | n Lymph.<br>Met.                                         | n Distant Met. at<br>Presentation/Study<br>Start (Specified Sites) | n SC:n LC         | Other Histological<br>Components | Overall<br>Survival Mo<br>(Range) | Long-Term Survivors<br>(>2 Years, DOD, AWD, NED), n:<br>Time Til Death/Follow-Up Mo |
|-----------------------------------------------------|----------------|-------------------------------|---------------------------|----------------------------------------------------------|---------------------|--------------------------------------------------|----------------------------------------------------------|--------------------------------------------------------------------|-------------------|----------------------------------|-----------------------------------|-------------------------------------------------------------------------------------|
| Furlan D.<br>[43] (2005,<br>Italy)                  | NA             | NA                            | 10 (6:4)                  | NA                                                       | (50–77)             | All<br>intermediate<br>-large or<br>intermediate | 7                                                        | 4 (4 liver), NA if<br>lymph mets<br>were distant                   | NA                | NA                               | (1–72), 2 NA,                     | 1: 72                                                                               |
| Grabrowski<br>P. [45]<br>(2005,<br>Germany)         | 1981–<br>2001  | NA                            | 8 (NA)                    | 4:4 (1 cecum/ascending<br>colon, 3 colon,<br>4 rectum)   | NA                  | All<br>>2 cm                                     | NA                                                       | 8                                                                  | NA                | NA                               | NA                                | NA                                                                                  |
| Shida T. [50]<br>(2005,<br>Japan)                   | 1999–<br>2004  | NA                            | 6 (3:3)                   | 3:3 (NA)                                                 | (45–78)             | NA                                               | NA                                                       | 3                                                                  | 3:3<br>(moderate) | NA                               | Average<br>7 (1–14)               | NA                                                                                  |
| Haider K.<br>[12] (2006,<br>Canada)                 | 1971–<br>2002  | NA                            | 8 (4:4)                   | NA                                                       | NA                  | NA                                               | NA                                                       | 4 ED                                                               | 8 <sup>b</sup> :0 | NA                               | NA                                | NA                                                                                  |
| Hainsworth<br>J.D. [84]<br>(2006, USA) <sup>a</sup> | 1999–<br>2005  | NA                            | 9 (NA)                    | NA                                                       | NA                  | NA                                               | NA<br>(9 lymph<br>nodes or<br>distant<br>metastases<br>) | 9 (lymph nodes or<br>distant metastases)                           | NA                | NA                               | NA                                | NA                                                                                  |
| Li A.F.Y.<br>[42] (2006,<br>Taiwan)                 | 1985–<br>2004  | NA                            | 6 (3:3)                   | 6:0 (NA)                                                 | (32–79)             | NA                                               | 6                                                        | 5                                                                  | NA                | NA                               | Average:<br>14 (0–35)             | 2: 34, 35                                                                           |

Table 10. Cont.

| Author<br>(Year,<br>Country)                | Time<br>Period | % of<br>Colorectal<br>Cancers | n Colorectal<br>NEC (M:W) | n Colonic NEC:<br>n Rectal NEC<br>(n Specified Location)                                                        | Age Year<br>(Range)                  | Size cm<br>(Range) | n Lymph.<br>Met. | n Distant Met. at<br>Presentation/Study<br>Start (Specified Sites) | n SC:n LC          | Other Histological<br>Components | Overall<br>Survival Mo<br>(Range)   | Long-Term Survivors<br>(>2 Years, DOD, AWD, NED), n:<br>Time Til Death/Follow-Up Mo |
|---------------------------------------------|----------------|-------------------------------|---------------------------|-----------------------------------------------------------------------------------------------------------------|--------------------------------------|--------------------|------------------|--------------------------------------------------------------------|--------------------|----------------------------------|-------------------------------------|-------------------------------------------------------------------------------------|
| Uccella S.<br>[37] (2006,<br>Italy)         | 1982–<br>2004  | NA                            | 11 (8:3)                  | NA                                                                                                              | (50–85)                              | (1.3–7)            | NA               | (11 “malignant”)                                                   | NA                 | NA                               | NA                                  | NA                                                                                  |
| Kang H. [5]<br>(2007, USA)                  | 1991–<br>2000  | 0.3%                          | 455<br>(222: 233)         | 65.7%:29.6%<br>(44.9% right colon,<br>6.9% transverse colon,<br>13.9% left colon,<br>29.6% rectum)<br>(4.6% NA) | M <sup>1</sup> : 67.9<br>(SD ± 14.4) | NA                 | NA               | 62.1% distant,<br>27.1% regional,<br>10.8% localized               | NA                 | NA                               | 5 years relative<br>survival: 21.4% | 21.4%: alive at 5-year                                                              |
| Lee S.S. [15]<br>(2007,<br>Korea)           | 1995–<br>2004  | NA                            | 5 (NA)                    | 2:3 (NA)                                                                                                        | NA                                   | NA                 | NA               | NA                                                                 | 5 <sup>b</sup> :0  | NA                               | NA                                  | NA                                                                                  |
| Lepage C.<br>[1] (2007,<br>UK)              | 1986–<br>1999  | NA                            | 95 (NA)                   | NA                                                                                                              | NA                                   | NA                 | NA               | NA                                                                 | 95 <sup>b</sup> :0 | NA                               | 1 year relative<br>survival: 27%    | NA                                                                                  |
| Ploekinger<br>U. [73]<br>(2007,<br>Germany) | 1999–<br>2007  | NA                            | 14 (NA)                   | NA                                                                                                              | NA                                   | NA                 | NA               | NA                                                                 | NA                 | NA                               | NA                                  | NA                                                                                  |
| Arnold C.N.<br>[265] (2008,<br>Germany)     | NA             | NA                            | 28 (13:6)<br>(9NA)        | 25:3 (NA)                                                                                                       | (29–92)                              | NA                 | NA               | (28 “malignant”)                                                   | NA                 | NA                               | (0–57 weeks)<br>(10 NA)             | 6: 18–99 weeks                                                                      |



Table S10. Cont.

| Author<br>(Year,<br>Country)                             | Time<br>Period | % of<br>Colorectal<br>Cancers | n Colorectal<br>NEC (M:W) | n Colonic NEC:<br>n Rectal NEC<br>(n Specified Location) | Age Year<br>(Range)             | Size cm<br>(Range) | n Lymph.<br>Met. | n Distant Met. at<br>Presentation/Study<br>Start (Specified Sites) | n SC:n LC           | Other Histological<br>Components | Overall<br>Survival Mo<br>(Range) | Long-Term Survivors<br>(>2 Years, DOD, AWD, NED), n:<br>Time Til Death/Follow-Up Mo |
|----------------------------------------------------------|----------------|-------------------------------|---------------------------|----------------------------------------------------------|---------------------------------|--------------------|------------------|--------------------------------------------------------------------|---------------------|----------------------------------|-----------------------------------|-------------------------------------------------------------------------------------|
| Li A.F.Y.<br>[16] (2010,<br>Taiwan)                      | 1989–<br>2008  | NA                            | 13 (10:3)                 | NA                                                       | M <sup>1</sup> : 61.9 ±<br>18.5 | NA                 | NA               | 12 ED                                                              | 13 <sup>b</sup> :0  | NA                               | M <sup>2</sup> : 6 ± 1.59<br>(SD) | 0                                                                                   |
| Li A.F.Y.<br>[34] (2010,<br>Taiwan)                      | 1989–<br>2009  | NA                            | 15 (11:4)                 | NA                                                       | M <sup>1</sup> :<br>54 ± 19     | NA                 | NA               | 15 ED                                                              | 15 <sup>b</sup> :0  | 0                                | M <sup>2</sup> : 5.1 ± 3.1        | NA                                                                                  |
| Niederle<br>M.B. [66]<br>(2010,<br>Austria) <sup>a</sup> | 2004–<br>2005  | NA                            | 8 (NA)                    | 4:4 (NA)                                                 | NA                              | NA                 | NA               | NA                                                                 | 8:0                 | NA                               | NA                                | NA                                                                                  |
| Shida T.<br>(2010,<br>Japan) [56]                        | 1999–<br>2007  | NA                            | 6 (2:4)                   | 2:4 (NA)                                                 | (47–84)                         | NA                 | NA               | 3                                                                  | 2:4                 | NA                               | Average: 27<br>(1–65)             | 3: 65, 50, 36                                                                       |
| Grossman<br>R.A. [11]<br>(2011, USA)                     | 1973–<br>2006  | NA                            | 342 (NA)                  | NA                                                       | NA                              | NA                 | NA               | NA                                                                 | 342 <sup>b</sup> :0 | NA                               | NA                                | NA                                                                                  |
| Patta A.<br>[269] (2011,<br>USA)                         | 2003–<br>2010  | NA                            | 8 (5:3)                   | 3:5 (NA)                                                 | M <sup>2</sup> : 64<br>(31–83)  | NA                 | 5                | 8 (8 liver, 2 lung,<br>1 peritoneum, 1 bone,<br>3 distant lymph)   | NA                  | NA                               | M <sup>2</sup> : 9.5<br>(3.5–17)  | 0                                                                                   |
| Welin S.<br>[108] (2011,<br>Sweden,<br>Norway)           | 2004–<br>2009  | NA                            | 5 (NA)                    | NA                                                       | NA                              | NA                 | NA               | 5                                                                  | NA                  | NA                               | NA                                | NA                                                                                  |



Table S10. Cont.

| Author<br>(Year,<br>Country)                    | Time<br>Period | % of<br>Colorectal<br>Cancers | n Colorectal<br>NEC (M:W) | n Colonic NEC:<br>n Rectal NEC<br>(n Specified Location) | Age Year<br>(Range)    | Size cm<br>(Range)             | n Lymph.<br>Met. | n Distant Met. at<br>Presentation/Study<br>Start (Specified Sites) | n SC:n LC          | Other Histological<br>Components     | Overall<br>Survival Mo<br>(Range) | Long-Term Survivors<br>(>2 Years, DOD, AWD, NED), n:<br>Time Til Death/Follow-Up Mo |
|-------------------------------------------------|----------------|-------------------------------|---------------------------|----------------------------------------------------------|------------------------|--------------------------------|------------------|--------------------------------------------------------------------|--------------------|--------------------------------------|-----------------------------------|-------------------------------------------------------------------------------------|
| Faggiano A.<br>[68] (2012,<br>Italy)            | 1990–<br>2007  | NA                            | 7 (NA)                    | NA                                                       | NA                     | NA                             | NA               | NA                                                                 | NA                 | NA                                   | NA                                | NA                                                                                  |
| Korse C.M<br>[95]<br>(2012, The<br>Netherlands) | 1994–<br>2009  | NA                            | 5 (NA)                    | 5:0 (NA)                                                 | NA                     | NA                             | NA               | NA                                                                 | 2:3                | NA                                   | NA                                | NA                                                                                  |
| La Rosa<br>[268] (2012,<br>Italy)               | 1980–<br>2010  | NA                            | 27 (15:12)                | 26: 0 (17 right colon,<br>9 left colon) (1 NA)           | Average:<br>67 (34–85) | NA                             | 19               | 8                                                                  | 12:11<br>(4 mixed) | 11 + non-neuroendocrine<br>component | 1 year survival:<br>ca. 20%       | 4: 11–257 (M <sup>1</sup> : 190)                                                    |
| Olsen I.H.<br>[117] (2012,<br>Denmark)          | 2007–<br>2009  | NA                            | 6 (NA)                    | NA                                                       | NA                     | NA                             | NA               | 6                                                                  | NA                 | NA                                   | NA                                | NA                                                                                  |
| Olsen I.H.<br>[122] (2012,<br>Denmark)          | NA             | NA                            | 5 (NA)                    | NA                                                       | NA                     | NA                             | NA               | 5                                                                  | NA                 | NA                                   | NA                                | NA                                                                                  |
| Chagpar R.<br>[273] (2013,<br>USA)              | NA             | NA                            | 528 (NA)                  | NA                                                       | NA                     | NA                             | NA               | NA                                                                 | NA                 | NA                                   | NA                                | NA                                                                                  |
| Delektorskaya<br>V.V. [67]<br>(2013,<br>Russia) | 1994–<br>2011  | NA                            | 8 (NA)                    | NA                                                       | NA                     | M <sup>1</sup> : 4.3 (2–<br>9) | 6                | 4                                                                  | NA                 | NA                                   | NA                                | NA                                                                                  |

Table S10. Cont.

| Author<br>(Year,<br>Country)                                                | Time<br>Period | % of<br>Colorectal<br>Cancers | n Colorectal<br>NEC (M:W) | n Colonic NEC:<br>n Rectal NEC<br>(n Specified Location) | Age Year<br>(Range)              | Size cm<br>(Range) | n Lymph.<br>Met. | n Distant Met. at<br>Presentation/Study<br>Start (Specified Sites) | n SC:n LC                                                   | Other Histological<br>Components | Overall<br>Survival Mo<br>(Range)                                                                                    | Long-Term Survivors<br>(>2 Years, DOD, AWD, NED), n:<br>Time Til Death/Follow-Up Mo |
|-----------------------------------------------------------------------------|----------------|-------------------------------|---------------------------|----------------------------------------------------------|----------------------------------|--------------------|------------------|--------------------------------------------------------------------|-------------------------------------------------------------|----------------------------------|----------------------------------------------------------------------------------------------------------------------|-------------------------------------------------------------------------------------|
| Feng S.T.<br>[82] (2013,<br>China)                                          | 2009–<br>2013  | NA                            | 5 (NA)                    | 0:5 (NA)                                                 | NA                               | NA                 | NA               | NA                                                                 | NA                                                          | NA                               | NA                                                                                                                   | NA                                                                                  |
| Furlan D.<br>[281] (2013,<br>Italy)                                         | 1989–<br>2009  | NA                            | 21 (13:8)                 | 21:0 (10 right colon,<br>11 left colon)                  | M <sup>2</sup> : 69.5<br>(44–85) | NA                 | NA               | 16 stage<br>III–IV (AJCC)                                          | NA                                                          | NA                               | NA                                                                                                                   | 2: 93, 215                                                                          |
| Korse C.M<br>[3]. (2013,<br>Netherlands<br>Cancer<br>Registry) <sup>e</sup> | 1990–<br>2010  | NA                            | 372 (NA)                  | NA                                                       | NA                               | NA                 | NA               | NA                                                                 | NA                                                          | NA                               | 5 years relative<br>survival rate:<br>LC 1990–2000/<br>2001–2010:<br>24/22%.<br>SC 1990–2000/<br>2001–2010<br>12/9%. | NA                                                                                  |
| Sorbye H.<br>[4] (2013,<br>12 Nordic<br>hospitals)                          | 2000–<br>2009  | NA                            | 82 (NA)                   | 61:21 (NA)                                               | NA                               | NA                 | NA               | NA                                                                 | 65% rectal<br>tumours:<br>SC, 30%<br>of colon<br>tumours:SC | NA                               | M <sup>2</sup> : colon: 8<br>(CI 95%:<br>6.0–9.9),<br>rectum: 10 (CI<br>95%: 8.4–13.6)                               | NA                                                                                  |

Table S10. Cont.

| Author<br>(Year,<br>Country)                                | Time<br>Period | % of<br>Colorectal<br>Cancers | n Colorectal<br>NEC (M:W) | n Colonic NEC:<br>n Rectal NEC<br>(n Specified Location)                                                          | Age Year<br>(Range)                            | Size cm<br>(Range)                         | n Lymph.<br>Met. | n Distant Met. at<br>Presentation/Study<br>Start (Specified Sites)                                                             | n SC:n LC                                                 | Other Histological<br>Components                    | Overall<br>Survival Mo<br>(Range) | Long-Term Survivors<br>(>2 Years, DOD, AWD, NED), n:<br>Time Til Death/Follow-Up Mo |
|-------------------------------------------------------------|----------------|-------------------------------|---------------------------|-------------------------------------------------------------------------------------------------------------------|------------------------------------------------|--------------------------------------------|------------------|--------------------------------------------------------------------------------------------------------------------------------|-----------------------------------------------------------|-----------------------------------------------------|-----------------------------------|-------------------------------------------------------------------------------------|
| Van der<br>Zwan J.M.<br>[284] (2013<br>RARECARE,<br>Europe) | 1995–<br>2002  | NA                            | 172                       | 86                                                                                                                | NA                                             | NA                                         | NA               | NA                                                                                                                             | NA                                                        | NA                                                  | NA                                | NA                                                                                  |
| Aytac E.<br>[262] (2014,<br>USA)                            | 1993–<br>2011  | 0.33%                         | 25 (8:17)                 | 9:16 (4 right colon,<br>3 transverse colon,<br>2 sigmoid colon,<br>7 rectum, 9 anal canal)                        | M <sup>1</sup> : 56.4 ±<br>2.7                 | NA                                         | NA               | 9 (7 liver, 3 lung,<br>2 brain)                                                                                                | NA                                                        | 6+ adenocarcinoma,<br>1+ adenosquamous<br>component | NA                                | NA                                                                                  |
| Lee J.L. [25]<br>(2014, Korea)                              | 2000–<br>2010  | 0.16%                         | 18 (15:5) <sup>f</sup>    | 12:8 (2 cecum,<br>4 ascending colon,<br>1 flexure, 1 transverse<br>colon, 4 left colon,<br>8 rectum) <sup>f</sup> | M <sup>1</sup> : 64<br>years ± 11 <sup>f</sup> | M <sup>1</sup> : 5.1 ±<br>2.5 <sup>f</sup> | NA               | 10 (6 liver, 2 distant<br>lymph, 2 multi liver +<br>perineal seeding) <sup>f</sup>                                             | 8: 6<br>(4 mixed,<br>2 MANEC)                             | NA                                                  | M <sup>2</sup> : 16 <sup>f</sup>  | NA                                                                                  |
| Smith J.D.<br>[270] (2014,<br>USA)                          | 1991–<br>2010  | NA                            | 126 (62:64)               | 70: 58 (38 colon,<br>23 cecum, 9 sigmoid,<br>53 rectum,<br>5 anal canal)                                          | M <sup>2</sup> : 56<br>(30–91)                 | M <sup>2</sup> : 4 (0.1–<br>11)            | NA               | 85 (64 liver, 11 lung,<br>10 bone,<br>8 retroperitoneal<br>lymph nodes,<br>7 peritoneum,<br>5 inguinal lymph<br>node, 2 brain) | 49:23 (18<br>collision<br>tumour +<br>adenocarci<br>noma) | 4 + adenocarcinoma                                  | M <sup>2</sup> : 13.2             | 3: M <sup>2</sup> 37 mo follow-up                                                   |

Table S10. Cont.

| Author<br>(Year,<br>Country)          | Time<br>Period | % of<br>Colorectal<br>Cancers | n Colorectal<br>NEC (M:W)                                          | n Colonic NEC:<br>n Rectal NEC<br>(n Specified Location)      | Age Year<br>(Range) | Size cm<br>(Range) | n Lymph.<br>Met.               | n Distant Met. at<br>Presentation/Study<br>Start (Specified Sites)                                                                                                                      | n SC:n LC | Other Histological<br>Components | Overall<br>Survival Mo<br>(Range) | Long-Term Survivors<br>(>2 Years, DOD, AWD, NED), n:<br>Time Til Death/Follow-Up Mo |
|---------------------------------------|----------------|-------------------------------|--------------------------------------------------------------------|---------------------------------------------------------------|---------------------|--------------------|--------------------------------|-----------------------------------------------------------------------------------------------------------------------------------------------------------------------------------------|-----------|----------------------------------|-----------------------------------|-------------------------------------------------------------------------------------|
| Yamaguchi<br>T. [92]<br>(2014, Japan) | 2000–<br>2011  | NA                            | 31 <sup>g</sup>                                                    | NA                                                            | NA                  | NA                 | NA                             | NA                                                                                                                                                                                      | NA        | NA                               | M <sup>2</sup> : 7.6 <sup>g</sup> | NA                                                                                  |
| TOTAL                                 | 1964–<br>2010  | 0.3–1.9 <sup>h</sup>          | 2026 <sup>h</sup><br>(M: 436/841<br>(52%),<br>W: 405/841<br>(48%)) | COLON: 410/594 <sup>h</sup> ,<br>RECTUM: 170/594 <sup>h</sup> | (29–92)             | (0.1–11)           | 79/112<br>(71%) <sup>h,i</sup> | 199/307 (65%) (sites<br>when mentioned:<br>105 liver,<br>19 peritoneum,<br>16 distant lymph<br>metastases, 14 lung,<br>12 bone, 2 brain,<br>1 diaphragma,<br>1 duodenum) <sup>h,i</sup> | -         | -                                | -                                 | -                                                                                   |

NEC: Neuroendocrine Carcinoma: includes WHO 2000/2004/2010 definition (poorly differentiated endocrine carcinomas, G3 tumours, small cell and large cell carcinomas); NA: Not Available; M: Men; W: Women; M<sup>1</sup>: Mean; M<sup>2</sup>: Median; Mo: Month/s; Year: Year/s; SC: Small Cell; LC: Large Cell; Met.: Metastases; CI: Confidence Intervall; DOD: Dead of disease; AWD: Alive with disease; NED: No evidence of disease; LD: tumour confined to a localized anatomic region (the oesophagus/perioesophageal tissue/adjacent organs) with/without locoregional lymph nodes metastases (encompassable within a tolerable radiation therapy treatment portal), ED: outside LD; AJCC: American Joint Committee on Cancer; <sup>a</sup> Prospective study, all others NA or retrospective; <sup>b</sup> Part of inclusion criteria; <sup>c</sup> Includes moderately differentiated and well differentiated tumours; <sup>d</sup> Includes 1 appendix NEC; <sup>e</sup> Not all numbers are exact- from incidence rates.; <sup>f</sup> Includes 2 MANEC (unknown distribution); <sup>g</sup> Orignal cohort (mixed NEC primaries) includes 21 MANECs, unknown distribution; <sup>h</sup> after removal of possible overlapping cohorts with lowest case numbers; <sup>i</sup> procent values and LD/ED not included.
